# Supplementary material for: Treatment of Locally Advanced Rectal Cancer in the Era of Total Neoadjuvant Therapy: A Systematic Review and Network Meta-Analysis
Source: PubMed Central journal article supplement (PMC11151159; doi:10.1001/jamanetworkopen.2024.14702), 2024-06-04
Supplement: jamanetwopen-e2414702-s001.pdf [file jamanetwopen-e2414702-s001.pdf]

## Supplemental Online Content

Turri G, Ostuzzi G, Vita G, et al. Treatment of locally advanced rectal cancer in the era of total neoadjuvant therapy: a systematic review and network meta-analysis. *JAMA Netw Open*. 2024;7(6):e2414702. doi:10.1001/jamanetworkopen.2024.14702

**eFigure 1.** PRISMA Flowchart

**eAppendix 1.** Search Strategy and Data Extraction

**eMethods 1.** Complete Statistical Methodology

**eTable 1.** List of Studies Included/Excluded/Ongoing/Awaiting Assessment

**eTable 2.** Characteristics of Included Studies

**eTable 3.** Summary of Inclusion and Exclusion Criteria of Included Studies

**eFigure 2.** Risk of Bias of Included Studies

**eFigure 3.** Transitivity Assessment and Meta-Regression

**eAppendix 2.** Primary Outcome: Patients With Pathologic Complete Response

**eAppendix 3.** Primary Outcome: Assessment of Publication Bias

**eAppendix 4.** Primary Outcome: Number Needed to Treat

**eAppendix 5.** Primary Outcome: CINeMA

**eAppendix 6.** Primary Outcome: Sensitivity Analyses

**eAppendix 7.** Tolerability of Treatment

**eAppendix 8.** Toxicity of Treatment

**eAppendix 9.** Dropouts by Any Cause

**eAppendix 10.** Preoperative Treatment Related Deaths

**eAppendix 11.** Rate of Randomized Patients Who Underwent Surgery

**eAppendix 12.** Rate of R0 Resections

**eAppendix 13.** Rate of Negative CRM

**eAppendix 14.** Rate of ypN0

**eAppendix 15.** Rate of Postoperative Complications Clavien-Dindo 3 or Greater

**eAppendix 16.** Rate of Anastomotic Leak

**eAppendix 17.** Locoregional Recurrence at 3 Years

**eAppendix 18.** Locoregional Recurrence at 5 Years

**eAppendix 19.** Locoregional Failure at 3 Years

**eAppendix 20.** Locoregional Failure at 5 Years

**eAppendix 21.** Distant Recurrence at 3 Years

**eAppendix 22.** Distant Recurrence at 5 Years

**eAppendix 23.** Disease-Free Survival at 3 Years

**eAppendix 24.** Disease-Free Survival at 5 Years

**eAppendix 25.** Overall Survival at 3 Years

**eAppendix 26.** Overall Survival at 5 Years

**eReferences**

This supplemental material has been provided by the authors to give readers additional information about their work.

**eFigure 1.** PRISMA Flowchart

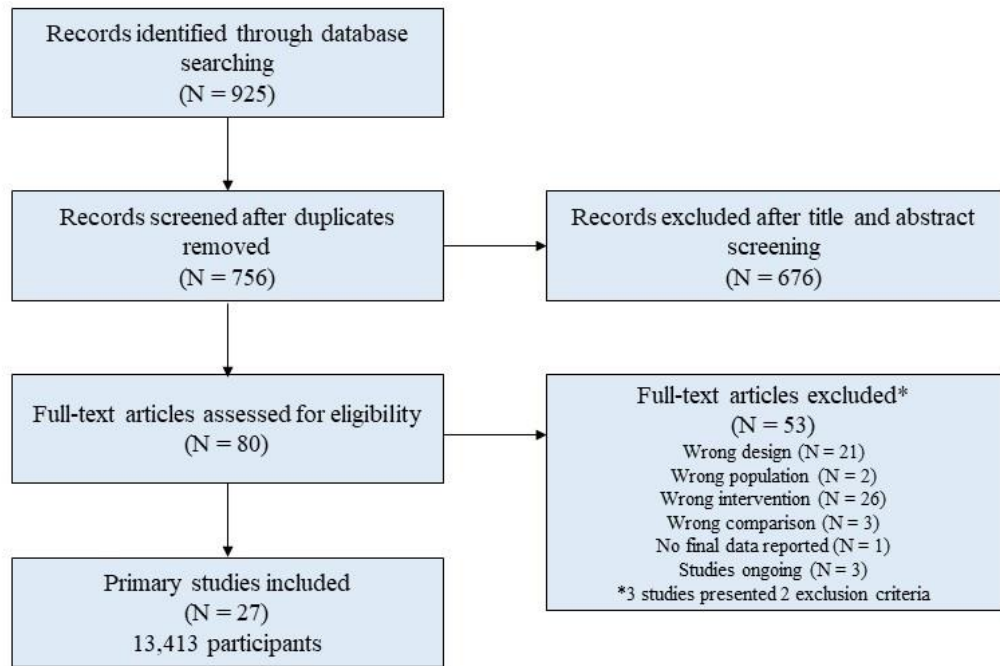

## eAppendix 1. Search Strategy and Data Extraction

We searched without time or language restrictions Medline, EMBASE, Cochrane Central Register of Controlled Trials (CENTRAL), and Web of Science Core Collection electronic databases. Further, we searched ClinicalTrials.gov for unpublished studies. We searched records from database inception to June 8, 2023 (full search strategy attached below). Additionally, we screened references of assessed articles for other potential matches for inclusion.

### PubMed (08/06/2023; 561 results)

("cancer"[Title/Abstract] OR "oncolog\*" [Title/Abstract] OR "adenocarcinoma"[Title/Abstract] OR "tumor"[Title/Abstract] OR "neoplas\*" [Title/Abstract]) AND ("rectum"[Title/Abstract] OR "rectal"[Title/Abstract]) AND ("neoadjuvant"[Title/Abstract] OR "preoperat\*" [Title/Abstract]) AND (randomizedcontrolledtrial[Filter])

### Web of Science, Core Collection (08/06/2023; 329 results)

#1 (((((TI=(cancer)) OR TI=(oncolog\*)) OR TI=(adenocarcinoma)) OR TI=(tumor)) OR TI=(neoplas\*))

#2 (TI=(rectum)) OR TI=(rectal)

#3 (TI=(neoadjuvant)) OR TI=(preoperat\*)

(((#1) AND #2) AND #3) AND ALL=(randomized controlled trial) AND LA=(English)

*Indexes=SCI-EXPANDED, SSCI, A&HCI, CPCI-S, CPCI-SSH, BKCI-S, BKCI-SSH, ESCI, CCR-EXPANDED, IC Timespan=All years*

### CENTRAL (08/06/2023; 837 results)

Neoadjuvant therapy rectal cancer in Title Abstract Keyword AND English in Language - (Word variations have been searched)

### ClinicalTrials.gov (08/06/2023, 399 results)

Neoadjuvant therapy; preoperative therapy, Condition: Rectal cancer, Filters: Interventional studies, Adults, Older Adults. Also searched for synonyms: preoperative therapy, induction therapy, treatment, rectal carcinoma, cancer of the rectum.

Two authors (GT, GO) independently assessed titles, abstracts and full texts of potentially relevant articles, and extracted data following recommendations of the Cochrane Handbook for Systematic Reviews of Interventions. Two authors (GT, GV) assessed the methodologic quality of included studies using the Cochrane Risk of Bias version 2 (RoB2) tool. Disagreements were resolved by discussion and consensus with a third senior author (CP, CB).

## eMethods 1. Complete Statistical Methodology

We performed a standard pairwise, random-effects meta-analysis for every comparison, and, for each outcome, we also conducted a NMA with a random-effects model in a frequentist framework, using RStudio (version 2023.06.0-421) *netmeta* package and Stata (version 17.0) *mvmeta* package. For dichotomous outcomes, we calculated and pooled relative risks (RRs) with 95% confidence intervals (CIs).

We calculated dichotomous data on a strict intention-to-treat (ITT) basis, considering the total number of randomized participants as denominator. For the primary outcome, where participants had been excluded from the trial before the endpoint, we assumed that they experienced a negative outcome by the end of the trial.

When relevant outcomes were not reported, we asked trial authors to supply the data. In the absence of data from authors, we employed validated statistical methods to impute missing outcomes, with due consideration of the possible bias of these procedures, in accordance with the Cochrane Handbook<sup>1</sup>. When standard deviations (SDs) were not reported and not supplied by authors upon request, we calculated them based on the standard error (SE) or t-statistics or P values<sup>1</sup>.

For the primary outcome, we calculated the number-needed-to-treat (NNT), defined as the number of individuals needed to be treated with one treatment versus another for one individual to have an additional desirable or undesirable outcome (number-needed-to-treat-to-benefit, NNTB, or to-harm, NNTH, respectively)<sup>2</sup>, using validated methodology<sup>3</sup> (see Supplement for details).

For pairwise meta-analyses, we assessed heterogeneity by visual inspection of forest plots, and by the  $I^2$  statistics. For the NMA, common heterogeneity across all comparisons was assumed and estimated in each network<sup>4,5</sup>.

We assessed global heterogeneity by using the  $\tau^2$  (low:  $\tau^2 \leq 0.010$ , moderate:  $0.010 < \tau^2 \leq 0.242$ , high:  $\tau^2 > 0.242$ ) and the  $I^2$  (low, 0–40%; moderate, 30–60%; substantial, 50–90%; and considerable, 75–100%)<sup>6</sup>. For the NMA, common heterogeneity across all comparisons<sup>4</sup> was assumed and estimated in each network.

Transitivity assumption is met when effect modifiers are equally distributed across the comparisons. We expected that the inclusion and exclusion criteria would allow to select studies sufficiently similar in terms of characteristics of participants, study design and outcomes, in order for all treatments included in the network to be considered “exchangeable” (as if all of them were part of a large, multi-arm trial). We extracted key study characteristics judged to be potential effect modifiers, namely: study design (open-label or double-blind); number of participants included; definition of LAR; doses and cycles of chemotherapy agents; doses and modality of radiotherapy; months of follow-up; median year of study conduct; proportion of participants discontinuing treatment before study endpoint; percentage of female participants; mean age; percentage of clinical T3-4 (cT4); percentage of participants with clinically suspected nodal metastases (cN+); mean distance from the anal verge (AV); percentage of pathologic T4 after pre-operative treatment (ypT4). By comparing the distribution of these possible effect modifiers across comparisons contributing to the estimation of the treatment effect, we formulated a judgment on whether differences in their distributions were large enough to threaten the validity of the analysis<sup>7</sup>. We considered that distribution differences in specific study characteristics across the different treatment strategies were relevant in case of both significant imbalances according to the Kruskal-Wallis test (continuous variables), the Pearson  $\chi^2$  or the Fisher’s exact test (categorical variables), and meta-regression analyses showing an actual impact on treatment effect<sup>8,9</sup>.

We assessed the presence of inconsistency (defined as the statistical disagreement between direct and indirect evidence of a treatment comparison) by comparing direct and indirect evidence within each closed loop<sup>10</sup> and comparing the goodness of fit for an NMA model that assumes consistency with a model that allows for inconsistency in a “design by treatment interaction model” framework<sup>11</sup> by using the Stata commands *mvmeta*<sup>12</sup> and *ifplot*<sup>13</sup> and the Stata network suite<sup>14</sup>.

For the primary outcome, we calculated the probability of each treatment of being at each possible rank, and produced mean ranks of treatments using the R *gemtc* package.

If  $\geq 10$  studies were included in the primary outcome, we assessed publication bias by visually inspecting the funnel plot, testing for asymmetry with the Egger’s regression test<sup>15</sup>, and investigating possible reasons for funnel plot asymmetry.

For the primary outcome, we assessed the confidence of evidence by using the Confidence in Network Meta-Analysis (CINeMA) methodology<sup>16,17</sup> through its web-based application (<http://cinema.ispm.ch>).

For the primary outcome, we conducted sensitivity analyses excluding trials with (a) overall high risk of bias according to RoB2; (b) high risk of indirectness; (c) CHT as one of the treatment arms.

**eTable 1.** List of Studies Included/Excluded/Ongoing/Awaiting Assessment

| Study            | in/out   | Reason | Reason - details | Reference                                                                                                                                                                                                                                                                                                                                                                                                                                                                                                                                                                                                                                                                                                                                                                                                                                                                                                                                                                                                                              |
|------------------|----------|--------|------------------|----------------------------------------------------------------------------------------------------------------------------------------------------------------------------------------------------------------------------------------------------------------------------------------------------------------------------------------------------------------------------------------------------------------------------------------------------------------------------------------------------------------------------------------------------------------------------------------------------------------------------------------------------------------------------------------------------------------------------------------------------------------------------------------------------------------------------------------------------------------------------------------------------------------------------------------------------------------------------------------------------------------------------------------|
| Aschele 2011     | Included |        |                  | Aschele C, Cionini L, Lonardi S, et al. Primary tumor response to preoperative chemoradiation with or without oxaliplatin in locally advanced rectal cancer: Pathologic results of the STAR-01 randomized phase III trial. <i>J Clin Oncol.</i> 2011;29(20):2773-2780. doi:10.1200/JCO.2010.34.4911<br>Aschele C, Lonardi S, Cionini L, et al. Final results of STAR-01: A randomized phase III trial comparing preoperative chemoradiation with or without oxaliplatin in locally advanced rectal cancer. <i>J Clin Oncol.</i> 2016;34(15_suppl):3521-3521. doi:10.1200/jco.2016.34.15_suppl.3521                                                                                                                                                                                                                                                                                                                                                                                                                                     |
| Bahadoer 2021    | Included |        |                  | Bahadoer RR, Dijkstra EA, van Etten B, et al. Short-course radiotherapy followed by chemotherapy before total mesorectal excision (TME) versus preoperative chemoradiotherapy, TME, and optional adjuvant chemotherapy in locally advanced rectal cancer (RAPIDO): a randomised, open-label, phase 3 trial. <i>Lancet Oncol.</i> 2021;22(1):29-42. doi:10.1016/S1470-2045(20)30555-6<br>Bahadoer RR, Hospers GAP, Marijnen CAM, et al. Risk and location of distant metastases in patients with locally advanced rectal cancer after total neoadjuvant treatment or chemoradiotherapy in the RAPIDO trial. <i>Eur J Cancer.</i> 2023;185:139-149. doi: 10.1016/j.ejca.2023.02.027<br>Dijkstra EA, Nilsson PJ, Hospers GAP, et al. Locoregional Failure During and After Short-course Radiotherapy followed by Chemotherapy and Surgery Compared to Long-course Chemoradiotherapy and Surgery – A Five-year Follow-up of the RAPIDO Trial. <i>Ann Surg.</i> 2023;Published ahead of print(4):766-772. doi: 10.1097/sla.0000000000005799 |
| Bosset 2005      | Included |        |                  | Bosset JF, Calais G, Mineur L, et al. Enhanced tumoricidal effect of chemotherapy with preoperative radiotherapy for rectal cancer: Preliminary results - EORTC 22921. <i>J Clin Oncol.</i> 2005;23(24):5620-5627. doi:10.1200/JCO.2005.02.113<br>Bosset JF, Calais G, Mineur L, et al. Fluorouracil-based adjuvant chemotherapy after preoperative chemoradiotherapy in rectal cancer: Long-term results of the EORTC 22921 randomised study. <i>Lancet Oncol.</i> 2014;15(2):184-190. doi:10.1016/S1470-2045(13)70599-0                                                                                                                                                                                                                                                                                                                                                                                                                                                                                                              |
| Bujko 2004       | Included |        |                  | Bujko K, Nowacki MP, Nasierowska-Guttmejer A, et al. Sphincter preservation following preoperative radiotherapy for rectal cancer: Report of a randomised trial comparing short-term radiotherapy vs. conventionally fractionated radiochemotherapy. In: <i>Radiotherapy and Oncology.</i> Vol 72. Elsevier; 2004:15-24. doi:10.1016/j.radonc.2003.12.006<br>Bujko K, Nowacki MP, Nasierowska-Guttmejer A, Michalski W, Bebenek M, Kryj M. Long-term results of a randomized trial comparing preoperative short-course radiotherapy with preoperative conventionally fractionated chemoradiation for rectal cancer. <i>Br J Surg.</i> 2006;93(10):1215-1223. doi:10.1002/bjs.5506                                                                                                                                                                                                                                                                                                                                                      |
| Bujko 2013       | Included |        |                  | Bujko K, Nasierowska-Guttmejer A, Wyrwicz L, et al. Neoadjuvant treatment for unresectable rectal cancer: An interim analysis of a multicentre randomized study. <i>Radiother Oncol.</i> 2013;107(2):171-177. doi:10.1016/j.radonc.2013.03.001<br>Bujko K, Wyrwicz L, Rutkowski A, et al. Long-course oxaliplatin-based preoperative chemoradiation versus 5 × 5 Gy and consolidation chemotherapy for cT4 or fixed cT3 rectal cancer: Results of a randomized phase III study. <i>Ann Oncol.</i> 2016;27(5):834-842. doi:10.1093/annonc/mdw062                                                                                                                                                                                                                                                                                                                                                                                                                                                                                        |
| Chakrabarti 2021 | Included |        |                  | Chakrabarti D, Rajan S, Akhtar N, et al. Short-course radiotherapy with consolidation chemotherapy versus conventionally fractionated long-course chemoradiotherapy for locally advanced rectal cancer: randomized clinical trial. <i>Br J Surg.</i> 2021;108(5):511-520. doi:10.1093/bjs/znab020                                                                                                                                                                                                                                                                                                                                                                                                                                                                                                                                                                                                                                                                                                                                      |
| Conroy 2021      | Included |        |                  | Conroy T, Bosset JF, Etienne PL, et al. Neoadjuvant chemotherapy with FOLFIRINOX and preoperative chemoradiotherapy for patients with locally advanced rectal cancer (UNICANCER-PRODIGE 23): a multicentre, randomised, open-label, phase 3 trial. <i>Lancet Oncol.</i> 2021;22(5):702-715. doi:10.1016/S1470-2045(21)00079-6                                                                                                                                                                                                                                                                                                                                                                                                                                                                                                                                                                                                                                                                                                          |
| Deng 2016        | Included |        |                  | Deng Y, Chi P, Lan P, et al. Modified FOLFOX6 with or without radiation versus fluorouracil and leucovorin with radiation in neoadjuvant treatment of locally advanced rectal cancer: Initial results of the Chinese FOWARC multicenter, open-label, randomized three-arm phase III trial. <i>J Clin Oncol.</i> 2016;34(27):3300-3307. doi:10.1200/JCO.2016.66.6198<br>Deng Y, Chi P, Lan P, et al. Neoadjuvant modified folfox6 with or without radiation versus fluorouracil plus radiation for locally advanced rectal cancer: Final results of the Chinese FOWARC trial. <i>J Clin Oncol.</i> 2019;37(34):3223-3233. doi:10.1200/JCO.18.02309                                                                                                                                                                                                                                                                                                                                                                                      |

|                       |          |  |  |                                                                                                                                                                                                                                                                                                                                                                                                                                                                                                                                                                                                                                                                                                                                                                                         |
|-----------------------|----------|--|--|-----------------------------------------------------------------------------------------------------------------------------------------------------------------------------------------------------------------------------------------------------------------------------------------------------------------------------------------------------------------------------------------------------------------------------------------------------------------------------------------------------------------------------------------------------------------------------------------------------------------------------------------------------------------------------------------------------------------------------------------------------------------------------------------|
| Fernández-Martos 2015 | Included |  |  | Fernández-Martos C, Garcia-Albeniz X, Pericay C, et al. Chemoradiation, surgery and adjuvant chemotherapy versus induction chemotherapy followed by chemoradiation and surgery: Long-term results of the Spanish GCR-3 phase II randomized trial. <i>Ann Oncol.</i> 2015;26(8):1722-1728. doi:10.1093/annonc/mdv223                                                                                                                                                                                                                                                                                                                                                                                                                                                                     |
| Fokas 2019            | Included |  |  | Fokas E, Allgäuer M, Polat B, et al. Randomized phase II trial of chemoradiotherapy plus induction or consolidation chemotherapy as total neoadjuvant therapy for locally advanced rectal cancer: CAO/ARO/AIO-12. <i>J Clin Oncol.</i> 2019;37(34):3212-3222. doi:10.1200/JCO.19.00308<br>Fokas E, Schlenska-Lange A, Polat B, et al. Chemoradiotherapy Plus Induction or Consolidation Chemotherapy as Total Neoadjuvant Therapy for Patients with Locally Advanced Rectal Cancer: Long-term Results of the CAO/ARO/AIO-12 Randomized Clinical Trial. <i>JAMA Oncol.</i> 2022;8(1):e215445-e215445. doi:10.1001/jamaoncol.2021.5445                                                                                                                                                    |
| Gérard 2006           | Included |  |  | Gérard JP, Conroy T, Bonnetain F, et al. Preoperative radiotherapy with or without concurrent fluorouracil and leucovorin in T3-4 rectal cancers: Results of FFCD 9203. <i>J Clin Oncol.</i> 2006;24(28):4620-4625. doi:10.1200/JCO.2006.06.7629                                                                                                                                                                                                                                                                                                                                                                                                                                                                                                                                        |
| Gérard 2010           | Included |  |  | Gérard JP, Azria D, Gourgou-Bourgade S, et al. Comparison of two neoadjuvant chemoradiotherapy regimens for locally advanced rectal cancer: Results of the phase III trial accord 12/0405-Prodige 2. <i>J Clin Oncol.</i> 2010;28(10):1638-1644. doi:10.1200/JCO.2009.25.8376<br>Gérard JP, Azria D, Gourgou-Bourgade S, et al. Clinical outcome of the ACCORD 12/0405 PRODIGE 2 randomized trial in rectal cancer. <i>J Clin Oncol.</i> 2012;30(36):4558-4565. doi:10.1200/JCO.2012.42.8771<br>Azria D, Doyen J, Jarlier M, et al. Late toxicities and clinical outcome at 5 years of the ACCORD 12/0405-PRODIGE 02 trial comparing two neoadjuvant chemoradiotherapy regimens for intermediate-risk rectal cancer. <i>Ann Oncol.</i> 2017;28(10):2436-2442. doi:10.1093/annonc/mdx351 |
| Haddad 2017           | Included |  |  | Haddad P, Miraie M, Farhan F, et al. Addition of oxaliplatin to neoadjuvant radiochemotherapy in MRI-defined T3, T4 or N+ rectal cancer: a randomized clinical trial. <i>Asia Pac J Clin Oncol.</i> 2017;13(6):416-422. doi:10.1111/ajco.12675                                                                                                                                                                                                                                                                                                                                                                                                                                                                                                                                          |
| Jiao 2015             | Included |  |  | Jiao D, Zhang R, Gong Z, et al. Fluorouracil-based preoperative chemoradiotherapy with or without oxaliplatin for stage ii/iii rectal cancer: A 3-year follow-up study. <i>Chinese J Cancer Res.</i> 2015;27(6):588-596. doi:10.3978/j.issn.1000-9604.2015.12.05                                                                                                                                                                                                                                                                                                                                                                                                                                                                                                                        |
| Jin 2022              | Included |  |  | Jin J, Tang Y, Hu C, et al. Multicenter, Randomized, Phase III Trial of Short-Term Radiotherapy Plus Chemotherapy Versus Long-Term Chemoradiotherapy in Locally Advanced Rectal Cancer (STELLAR). <i>J Clin Oncol.</i> 2022;40(15):1681-1692. doi:10.1200/jco.21.01667                                                                                                                                                                                                                                                                                                                                                                                                                                                                                                                  |
| Kim 2018              | Included |  |  | Kim SY, Joo J, Kim TW, et al. A Randomized Phase 2 Trial of Consolidation Chemotherapy After Preoperative Chemoradiation Therapy Versus Chemoradiation Therapy Alone for Locally Advanced Rectal Cancer: KCSG CO 14-03. <i>Int J Radiat Oncol Biol Phys.</i> 2018;101(4):889-899. doi:10.1016/j.ijrobp.2018.04.013                                                                                                                                                                                                                                                                                                                                                                                                                                                                      |
| Latkauskas 2012       | Included |  |  | Latkauskas T, Pauzas H, Gineikiene I, et al. Initial results of a randomized controlled trial comparing clinical and pathological downstaging of rectal cancer after preoperative short-course radiotherapy or long-term chemoradiotherapy, both with delayed surgery. <i>Color Dis.</i> 2012;14(3):294-298. doi:10.1111/j.1463-1318.2011.02815.x<br>Latkauskas T, Pauzas H, Kairevice L, et al. Preoperative conventional chemoradiotherapy versus short-course radiotherapy with delayed surgery for rectal cancer: Results of a randomized controlled trial. <i>BMC Cancer.</i> 2016;16(1):1-7. doi:10.1186/s12885-016-2959-9                                                                                                                                                        |
| Maréchal 2012         | Included |  |  | Maréchal R, Vos B, Polus M, et al. Short course chemotherapy followed by concomitant chemoradiotherapy and surgery in locally advanced rectal cancer: A randomized multicentric phase II study. <i>Ann Oncol.</i> 2012;23(6):1525-1530. doi:10.1093/annonc/mdr473                                                                                                                                                                                                                                                                                                                                                                                                                                                                                                                       |
| Mei 2023              | Included |  |  | Mei W-J, Wang X-Z, Li Y-F, et al. Neoadjuvant Chemotherapy with CAPOX versus Chemoradiation for Locally Advanced Rectal Cancer with Uninvolved Mesorectal Fascia (CONVERT): Initial Results of a Phase III Trial. <i>Ann Surg.</i> 2023;277(4):557-564. doi:10.1097/sla.0000000000005780                                                                                                                                                                                                                                                                                                                                                                                                                                                                                                |
| Mohiuddin 2006        | Included |  |  | Mohiuddin M, Winter K, Mitchell E, et al. Randomized phase II study of neoadjuvant combined-modality chemoradiation for distal rectal cancer: Radiation therapy oncology group trial 0012. <i>J Clin Oncol.</i> 2006;24(4):650-655. doi:10.1200/JCO.2005.03.6095                                                                                                                                                                                                                                                                                                                                                                                                                                                                                                                        |
| Moore 2017            | Included |  |  | Moore J, Price T, Carruthers S, et al. Prospective randomized trial of neoadjuvant chemotherapy during the 'wait period' following preoperative chemoradiotherapy for rectal cancer: results of the WAIT trial. <i>Color Dis.</i> 2017;19(11):973-979. doi:10.1111/codi.13724                                                                                                                                                                                                                                                                                                                                                                                                                                                                                                           |
| Ngan 2012             | Included |  |  | Ngan SY, Burmeister B, Fisher RJ, et al. Randomized trial of short-course radiotherapy versus long-course chemoradiation comparing rates of local recurrence in patients with T3 rectal cancer: Trans-Tasman Radiation Oncology Group Trial 01.04. <i>J Clin Oncol.</i> 2012;30(31):3827-3833. doi:10.1200/JCO.2012.42.9597                                                                                                                                                                                                                                                                                                                                                                                                                                                             |

|                    |          |                    |                                          |                                                                                                                                                                                                                                                                                                                                                                                                                                                                                            |
|--------------------|----------|--------------------|------------------------------------------|--------------------------------------------------------------------------------------------------------------------------------------------------------------------------------------------------------------------------------------------------------------------------------------------------------------------------------------------------------------------------------------------------------------------------------------------------------------------------------------------|
|                    |          |                    |                                          | Ansari N, Solomon MJ, Fisher RJ, et al. Acute Adverse Events and Postoperative Complications in a Randomized Trial of Preoperative Short-course Radiotherapy Versus Long-course Chemoradiotherapy for T3 Adenocarcinoma of the Rectum: Trans-Tasman Radiation Oncology Group Trial (TROG 01.04). <i>Ann Surg.</i> 2017;265(5):882-888. doi:10.1097/SLA.0000000000001987                                                                                                                    |
| O'Connell 2014     | Included |                    |                                          | O'Connell MJ, Colangelo LH, Beart RW, et al. Capecitabine and oxaliplatin in the preoperative multimodality treatment of rectal cancer: Surgical end points from national surgical adjuvant breast and bowel project trial R-04. <i>J Clin Oncol.</i> 2014;32(18):1927-1934. doi:10.1200/JCO.2013.53.7753                                                                                                                                                                                  |
| Rodel 2015         | Included |                    |                                          | Rödel C, Graeven U, Fietkau R, et al. Oxaliplatin added to fluorouracil-based preoperative chemoradiotherapy and postoperative chemotherapy of locally advanced rectal cancer (the German CAO/ARO/AIO-04 study): final results of the multicentre, open-label, randomised, phase 3 trial. <i>Lancet Oncol.</i> 2015;16(8):979-989. doi:10.1016/S1470-2045(15)00159-X                                                                                                                       |
| Schmoll 2021       | Included |                    |                                          | Schmoll HJ, Stein A, van Cutsem E, et al. Pre- And postoperative capecitabine without or with oxaliplatin in locally advanced rectal cancer: PETACC 6 trial by EORTC GITCG and ROG, AIO, AGITG, BGDO, and FFCD. <i>J Clin Oncol.</i> 2021;39(1):17-29. doi:10.1200/JCO.20.01740                                                                                                                                                                                                            |
| Schrag 2023        | Included |                    |                                          | Schrag D, Shi Q, Weiser M et al. Preoperative treatment for locally advanced rectal cancer. <i>N Engl J Med.</i> 2023 Jun 4. doi: 10.1056/NEJMoa2303269. Online ahead of print.                                                                                                                                                                                                                                                                                                            |
| Wang 2019          | Included |                    |                                          | Wang J, Guan Y, Gu W, et al. Long-course neoadjuvant chemoradiotherapy with versus without a concomitant boost in locally advanced rectal cancer: A randomized, multicenter, phase II trial (FDRT-002). <i>Radiat Oncol.</i> 2019;14(1). doi:10.1186/s13014-019-1420-z                                                                                                                                                                                                                     |
| Choi 2023          | ONGOING  |                    |                                          | NCT05673772. Preoperative Sequential Short-course Radiation Therapy and FOLFOX for Locally Advanced Rectal Cancer (SOLAR). <a href="https://clinicaltrials.gov/ct2/show/NCT05673772?term=solar&amp;type=Intr&amp;cond=Rectal+Cancer&amp;cntry=KR&amp;draw=2&amp;rank=1">https://clinicaltrials.gov/ct2/show/NCT05673772?term=solar&amp;type=Intr&amp;cond=Rectal+Cancer&amp;cntry=KR&amp;draw=2&amp;rank=1</a>                                                                             |
| Kim 2018           | ONGOING  |                    |                                          | Kim CW, Kang BM, Kim IY, et al. Korean Society of Coloproctology (KSCP) trial of cONSolidation Chemotherapy for Locally advanced mid or low rectal cancer after neoadjUvant concurrent chemoraDiothErapy: A multicenter, randomized controlled trial (KONCLUDE). <i>BMC Cancer.</i> 2018;18(1):1-8. doi:10.1186/S12885-018-4466-7/TABLES/1                                                                                                                                                 |
| NCT03177382        | ONGOING  |                    |                                          | Total Neoadjuvant Treatment vs. Chemoradiotherapy in Local Advanced Rectal Cancer With High Risk Factors (TNTCRT). ClinicalTrials.gov Identifier: NCT03177382.                                                                                                                                                                                                                                                                                                                             |
| Wang 2022          | ONGOING  |                    |                                          | Wang Y, Shen L, Wan J, et al. Short-course radiotherapy combined with CAPOX and Toripalimab for the total neoadjuvant therapy of locally advanced rectal cancer: a randomized, prospective, multicentre, double-arm, phase II trial (TORCH). <i>BMC Cancer.</i> 2022;22(1):1-8. doi:10.1186/S12885-022-09348-Z/FIGURES/2                                                                                                                                                                   |
| Aboelnaga 2015     | Excluded | WRONG DESIGN       | Single arm                               | Aboelnaga EM, Daoud MA, Eladl EI, Zaid AM. Induction FOLFOX followed by preoperative hyperfractionated radiotherapy plus bolus 5-fluorouracil in locally advanced rectal carcinoma: single arm phase I-II study. <i>Med Oncol.</i> 2015 Apr;32(4):108. doi: 10.1007/s12032-015-0556-4.                                                                                                                                                                                                     |
| Aghili 2018        | Excluded | WRONG DESIGN       | Single arm                               | Aghili M, Sotoudeh S, Ghalehtaki R et al. Preoperative short course radiotherapy with concurrent and consolidation chemotherapies followed by delayed surgery in locally advanced rectal cancer: Preliminary results. <i>Radiat Oncol J</i> 2018; 36(1): 17-24. Doi: 10.3857/roj.2017.00185                                                                                                                                                                                                |
| Borg 2014          | Excluded | WRONG INTERVENTION | Immunotherapy                            | Borg C, André T, Manton G et al. Pathological response and safety of two neoadjuvant strategies with bevacizumab in MRI-defined locally advanced T3 resectable rectal cancer: a randomized, noncomparative phase II study. <i>Ann Oncol.</i> 2014 Nov;25(11):2205-2210. doi: 10.1093/annonc/mdu377.                                                                                                                                                                                        |
| Boulis-Wassif 1984 | Excluded | WRONG INTERVENTION | Wrong schedule of treatment              | Boulis-Wassif S, Gerard A, Loygue J, Camelot D, Buyse M, Duez N. Final results of a randomized trial on the treatment of rectal cancer with preoperative radiotherapy alone or in combination with 5-fluorouracil, followed by radical surgery. Trial of the European Organization on Research and Treatment of Cancer Gastrointestinal Tract Cancer Cooperative Group. <i>Cancer.</i> 1984 May 1;53(9):1811-8. doi: 10.1002/1097-0142(19840501)53:9<1811::aid-cnrcr2820530902>3.0.co;2-h. |
| Cedermark 1995     | Excluded | WRONG INTERVENTION | No preoperative therapy in control group | Cedermark B, Johansson H, Rutqvist LE, et al. The Stockholm I trial of preoperative short term radiotherapy in operable rectal carcinoma. A prospective randomized trial. Stockholm Colorectal Cancer Study Group. <i>Cancer.</i> 1995;75:2269-2275. doi: 10.1002/1097-0142(19950501)75:9<2269::aid-cnrcr2820750913>3.0.co;2-i.                                                                                                                                                            |
| Cercek 2012        | Excluded | WRONG DESIGN       | Single arm                               | Cercek A, Goodman KA, Hajj C et al. Neoadjuvant chemotherapy first, followed by chemoradiation and then surgery, in the management of locally advanced rectal cancer. <i>J Natl Compr Canc Netw.</i> 2014 Apr;12(4):513-9. doi: 10.6004/jnccn.2014.0056                                                                                                                                                                                                                                    |
| Chiorean 2012      | Excluded | WRONG DESIGN       | Single arm                               | Chiorean EG, Sanghani S, Schiel MA et al. Phase II and gene expression analysis trial of neoadjuvant capecitabine plus irinotecan followed by capecitabine-based chemoradiotherapy for locally advanced rectal cancer: Hoosier Oncology Group GI03-53. <i>Cancer Chemother Pharmacol.</i> 2012 Jul;70(1):25-32. doi: 10.1007/s00280-012-1883-1                                                                                                                                             |



|                       |          |                                |                                                       |                                                                                                                                                                                                                                                                                                                                                                                              |
|-----------------------|----------|--------------------------------|-------------------------------------------------------|----------------------------------------------------------------------------------------------------------------------------------------------------------------------------------------------------------------------------------------------------------------------------------------------------------------------------------------------------------------------------------------------|
| Chua 2010             | Excluded | WRONG DESIGN                   | Single arm                                            | Chua YJ, Barbachano Y, Cunningham D et al. Neoadjuvant capecitabine and oxaliplatin before chemoradiotherapy and total mesorectal excision in MRI-defined poor-risk rectal cancer: a phase 2 trial. <i>Lancet Oncol.</i> 2010 Mar;11(3):241-8. doi: 10.1016/S1470-2045(09)70381-X.                                                                                                           |
| Cotte 2015            | Excluded | WRONG INTERVENTION             | Wrong schedule of treatment                           | Cotte E, Passot G, Decullier E et al. Pathologic Response, When Increased by Longer Interval, Is a Marker but Not the Cause of Good Prognosis in Rectal Cancer: 17-year Follow-up of the Lyon R90-01 Randomized Trial. <i>Int J Radiat Oncol Biol Phys.</i> 2016 Mar 1;94(3):544-53. doi: 10.1016/j.ijrobp.2015.10.061.                                                                      |
| De Felice 2021        | Excluded | WRONG DESIGN                   | Single arm                                            | De Felice F, D'Ambrosio G, Iafrate F et al. Intensified Total Neoadjuvant Therapy in Patients With Locally Advanced Rectal Cancer: A Phase II Trial. <i>Clin Oncol (R Coll Radiol).</i> 2021 Dec;33(12):788-794. doi: 10.1016/j.clon.2021.06.006.                                                                                                                                            |
| Dewdney 2012          | Excluded | WRONG INTERVENTION             | Immunotherapy                                         | Dewdney A, Cunningham D, Tabernero J et al. Multicenter randomized phase II clinical trial comparing neoadjuvant oxaliplatin, capecitabine, and preoperative radiotherapy with or without cetuximab followed by total mesorectal excision in patients with high-risk rectal cancer (EXPERT-C). <i>J Clin Oncol.</i> 2012 May 10;30(14):1620-7. doi: 10.1200/JCO.2011.39.6036.                |
| Fernández-Martos 2019 | Excluded | WRONG INTERVENTION             | Immunotherapy                                         | Fernández-Martos C, Pericay C, Losa F et al. Effect of Aflibercept Plus Modified FOLFOX6 Induction Chemotherapy Before Standard Chemoradiotherapy and Surgery in Patients With High-Risk Rectal Adenocarcinoma: The GEMCAD 1402 Randomized Clinical Trial. <i>JAMA Oncol.</i> 2019 Nov 1;5(11):1566-1573. doi: 10.1001/jamaoncol.2019.2294.                                                  |
| Fisher 1988           | Excluded | WRONG INTERVENTION             | Adjuvant radiotherapy                                 | Fisher B, Wolmark N, Rockette H, et al. Postoperative adjuvant chemotherapy or radiation therapy for rectal cancer: results from NSABP protocol R-01. <i>J Natl Cancer Inst.</i> 1988;80:21-29. doi: 10.1093/jnci/80.1.21.                                                                                                                                                                   |
| Folkesson 2005        | Excluded | WRONG INTERVENTION             | No preoperative therapy in control group              | Folkesson J, Birgisson H, Pahlman L, et al. Swedish Rectal Cancer Trial: long lasting benefits from radiotherapy on survival and local recurrence rate. <i>J Clin Oncol.</i> 2005;23:5644-5650. doi: 10.1200/JCO.2005.08.144.                                                                                                                                                                |
| Gao 2014              | Excluded | WRONG DESIGN                   | Single arm                                            | Gao YH, An X, Sun WJ et al. Evaluation of capecitabine and oxaliplatin administered prior to and then concomitant to radiotherapy in high risk locally advanced rectal cancer. <i>J Surg Oncol.</i> 2014 Apr;109(5):478-82. doi: 10.1002/jso.23516.                                                                                                                                          |
| Gao 2014              | Excluded | WRONG DESIGN                   | Single arm                                            | Gao YH, Lin JZ, An X et al. Neoadjuvant sandwich treatment with oxaliplatin and capecitabine administered prior to, concurrently with, and following radiation therapy in locally advanced rectal cancer: a prospective phase 2 trial. <i>Int J Radiat Oncol Biol Phys.</i> 2014 Dec 1;90(5):1153-60. doi: 10.1016/j.ijrobp.2014.07.021.                                                     |
| Garcia-Aguilar 2015   | Excluded | WRONG DESIGN                   | Non randomized                                        | Garcia-Aguilar J, Chow OS, Smith DD, et al. Effect of adding mFOLFOX6 after neoadjuvant chemoradiation in locally advanced rectal cancer: A multicentre, phase 2 trial. <i>Lancet Oncol.</i> 2015;16(8):957-966. doi:10.1016/S1470-2045(15)00004-2                                                                                                                                           |
| Garcia-Aguilar 2022   | Excluded | WRONG INTERVENTION             | Non-operative management                              | Garcia-Aguilar J, Patil S, Gollub MJ et al. Organ Preservation in Patients With Rectal Adenocarcinoma Treated With Total Neoadjuvant Therapy. <i>J Clin Oncol.</i> 2022 Aug 10;40(23):2546-2556. doi: 10.1200/JCO.22.00032.                                                                                                                                                                  |
| Gerard 1988           | Excluded | WRONG INTERVENTION             | No preoperative therapy in control group              | Gérard A, Buyse M, Nordlinger M et al. Preoperative radiotherapy as adjuvant treatment in rectal cancer. Final results of a randomized study of the European Organization for Research and Treatment of Cancer (EORTC). <i>Ann Surg.</i> 1988 Nov;208(5):606-14. doi: 10.1097/0000658-198811000-00011.                                                                                       |
| Gerard 2023           | Excluded | WRONG DESIGN, WRONG COMPARISON | Wrong schedule of treatment, non-operative management | Gerard JP, Barbet N, Schiappa R et al. Neoadjuvant chemoradiotherapy with radiation dose escalation with contact x-ray brachytherapy boost or external beam radiotherapy boost for organ preservation in early cT2-cT3 rectal adenocarcinoma (OPERA): a phase 3, randomised controlled trial. <i>Lancet Gastroenterol Hepatol.</i> 2023 Apr;8(4):356-367. doi: 10.1016/S2468-1253(22)00392-2 |
| Goldberg 1994         | Excluded | WRONG INTERVENTION             | No preoperative therapy in control group              | Goldberg PA, Nicholls RJ, Porter NH, et al. Long-term results of a randomised trial of short-course low-dose adjuvant preoperative radiotherapy for rectal cancer: reduction in local treatment failure. <i>Eur J Cancer.</i> 1994;30A:1602-1606. doi: 10.1016/0959-8049(94)00312-s.                                                                                                         |
| Golo 2018             | Excluded | WRONG DESIGN                   | Single arm                                            | Golo D, But-Hadzic J, Anderlueh F et al. Induction chemotherapy, chemoradiotherapy and consolidation chemotherapy in preoperative treatment of rectal cancer - long-term results of phase II OIGIT-01 Trial. <i>Radiol Oncol.</i> 2018 Sep 11;52(3):267-274. doi: 10.2478/raon-2018-0028.                                                                                                    |
| Guillem 2005          | Excluded | WRONG DESIGN                   | Single arm                                            | Guillem JG, Chessin DB, Cohen AM et al. Long-term oncologic outcome following preoperative combined modality therapy and total mesorectal excision of locally advanced rectal cancer. <i>Ann Surg.</i> 2005 May;241(5):829-36; discussion 836-8. doi: 10.1097/01.sla.0000161980.46459.96.                                                                                                    |
| Hartley 2005          | Excluded | WRONG DESIGN                   | Pooled analysis                                       | Hartley A, Ho KF, McConkey C, Geh JI. Pathological complete response following pre-operative chemoradiotherapy in rectal cancer: analysis of phase II/III trials. <i>Br J Radiol.</i> 2005 Oct;78(934):934-8. doi: 10.1259/bjr/86650067.                                                                                                                                                     |
| Helbling 2012         | Excluded | WRONG INTERVENTION             | Monoclonal antibody                                   | Helbling D, Bodoky G, Gautschi O et al. Neoadjuvant chemoradiotherapy with or without panitumumab in patients with wild-type KRAS, locally advanced rectal cancer (LARC): a randomized, multicenter, phase II trial SAKK 41/07. <i>Ann Oncol.</i> 2013 Mar;24(3):718-25. doi: 10.1093/annonc/mds519.                                                                                         |



|                 |          |                                       |                                                 |                                                                                                                                                                                                                                                                                                                                                                                                                                                             |
|-----------------|----------|---------------------------------------|-------------------------------------------------|-------------------------------------------------------------------------------------------------------------------------------------------------------------------------------------------------------------------------------------------------------------------------------------------------------------------------------------------------------------------------------------------------------------------------------------------------------------|
| Hofheinz 2012   | Excluded | WRONG INTERVENTION                    | Comparison of two chemotherapy regimens         | Hofheinz RD, Wenz F, Post S et al. Chemoradiotherapy with capecitabine versus fluorouracil for locally advanced rectal cancer: a randomised, multicentre, non-inferiority, phase 3 trial. <i>Lancet Oncol.</i> 2012 Jun;13(6):579-88. doi: 10.1016/S1470-2045(12)70116-X.                                                                                                                                                                                   |
| Jung 2015       | Excluded | WRONG INTERVENTION                    | Comparison of two chemotherapy regimens         | Jung M, Shin SJ, Koom WS et al. A Randomized Phase 2 Study of Neoadjuvant Chemoradiation Therapy With 5-Fluorouracil/Leucovorin or Irinotecan/S-1 in Patients With Locally Advanced Rectal Cancer. <i>Int J Radiat Oncol Biol Phys.</i> 2015 Dec 1;93(5):1015-22. doi: 10.1016/j.ijrobp.2015.08.037.                                                                                                                                                        |
| Kapiteijn 2001  | Excluded | WRONG COMPARISON                      | No preoperative therapy in control group        | Kapiteijn E, Marijnen CA, Nagtegaal ID, et al. Preoperative radiotherapy combined with total mesorectal excision for resectable rectal cancer. <i>N Engl J Med.</i> 2001;345:638-646. doi: 10.1056/NEJMoa010580.                                                                                                                                                                                                                                            |
| Kayal 2014      | Excluded | WRONG INTERVENTION                    | Comparison of two chemotherapy regimens         | Kayal PK, Saha A, Dastidar AG, Mahata A, Das A, Sarkar R. A randomized comparative study between neoadjuvant 5-fluorouracil and leucovorin versus 5-fluorouracil and cisplatin along with concurrent radiation in locally advanced carcinoma rectum. <i>Clin Cancer Investig J</i> 2014;3:32-7.                                                                                                                                                             |
| Lefevre 2016    | Excluded | WRONG INTERVENTION                    | Wrong schedule of treatment                     | Lefevre JH, Mineur L, Kotti S et al. Effect of Interval (7 or 11 weeks) Between Neoadjuvant Radiochemotherapy and Surgery on Complete Pathologic Response in Rectal Cancer: A Multicenter, Randomized, Controlled Trial (GRECCAR-6). <i>J Clin Oncol.</i> 2016 Nov 1;34(31):3773-3780. doi: 10.1200/JCO.2016.67.6049.                                                                                                                                       |
| Marco 2018      | Excluded | WRONG DESIGN                          | Not randomized                                  | Marco MR, Zhou L, Patil S, et al. Consolidation mFOLFOX6 chemotherapy after chemoradiotherapy improves survival in patients with locally advanced rectal cancer: Final results of a multicenter phase II trial. <i>Dis Colon Rectum.</i> 2018;61(10):1146-1155. doi:10.1097/DCR.0000000000001207                                                                                                                                                            |
| Markovina 2017  | Excluded | WRONG DESIGN                          | Not randomized                                  | Markovina S, Youssef F, Roy A, et al. Improved Metastasis- and Disease-Free Survival With Preoperative Sequential Short-Course Radiation Therapy and FOLFOX Chemotherapy for Rectal Cancer Compared With Neoadjuvant Long-Course Chemoradiotherapy: Results of a Matched Pair Analysis. In: <i>International Journal of Radiation Oncology Biology Physics.</i> Vol 99. <i>Int J Radiat Oncol Biol Phys;</i> 2017:417-426. doi:10.1016/j.ijrobp.2017.05.048 |
| Masi 2019       | Excluded | WRONG DESIGN                          | Single arm                                      | Masi G, Vivaldi C, Fornaro L et al. Total neoadjuvant approach with FOLFOXIRI plus bevacizumab followed by chemoradiotherapy plus bevacizumab in locally advanced rectal cancer: the TRUST trial. <i>Eur J Cancer.</i> 2019 Mar;110:32-41. doi: 10.1016/j.ejca.2019.01.006.                                                                                                                                                                                 |
| NCT02514278     | Excluded | WRONG INTERVENTION                    | Non-operative management, ongoing               | Optimisation of Response for Organ Preservation in Rectal Cancer : Neoadjuvant Chemotherapy and Radiochemotherapy vs. Radiochemotherapy (GRECCAR12). <i>ClinicalTrials.gov Identifier:</i> NCT02514278.                                                                                                                                                                                                                                                     |
| NCT02945566     | Excluded | WRONG INTERVENTION , WRONG POPULATION | Non-operative management, early rectal cancer   | Can the Rectum be Saved by Watchful Waiting or TransAnal Surgery Following (Chemo)Radiotherapy Versus Total Mesorectal Excision for Early REctal Cancer? (STAR-TREC). <i>ClinicalTrials.gov Identifier:</i> NCT02945566.                                                                                                                                                                                                                                    |
| NCT04246684     | Excluded | WRONG INTERVENTION                    | Non-operative management, ongoing               | Short RT Versus RCT,Followed by Chemo.and Organ Preservation for Interm and High-risk Rectal Cancer Patients. <i>ClinicalTrials.gov Identifier:</i> NCT04246684                                                                                                                                                                                                                                                                                             |
| Peeters 2007    | Excluded | WRONG DESIGN                          | No preoperative therapy in control group        | Peeters KCMJ, Marijnen CAM, Nagtegaal ID et al. The TME trial after a median follow-up of 6 years: increased local control but no survival benefit in irradiated patients with resectable rectal carcinoma. <i>Ann Surg.</i> 2007 Nov;246(5):693-701. doi: 10.1097/01.sla.0000257358.56863.ce.                                                                                                                                                              |
| Pettersson 2015 | Excluded | WRONG POPULATION                      | Exclusion of locally-advanced rectal cancer     | Pettersson D, Löhrinc E, Holm T et al. Tumour regression in the randomized Stockholm III Trial of radiotherapy regimens for rectal cancer. <i>Br J Surg.</i> 2015 Jul;102(8):972-8; discussion 978. doi: 10.1002/bjs.9811.                                                                                                                                                                                                                                  |
| Rahma 2021      | Excluded | WRONG INTERVENTION                    | Immunotherapy                                   | Rahma OE, Yothers G, Hong TS et al. Use of Total Neoadjuvant Therapy for Locally Advanced Rectal Cancer: Initial Results From the Pembrolizumab Arm of a Phase 2 Randomized Clinical Trial. <i>JAMA Oncol.</i> 2021 Aug 1;7(8):1225-1230. doi: 10.1001/jamaoncol.2021.1683.                                                                                                                                                                                 |
| Saha 2015       | Excluded | WRONG DESIGN                          | Pilot study                                     | Saha A, Ghosh SK, Roy C et al. A randomized controlled pilot study to compare capecitabine-oxaliplatin with 5-FU-leucovorin as neoadjuvant concurrent chemoradiation in locally advanced adenocarcinoma of rectum. <i>J Cancer Res Ther.</i> 2015 Jan-Mar;11(1):88-93. doi: 10.4103/0973-1482.150341.                                                                                                                                                       |
| Sauer 2012      | Excluded | WRONG INTERVENTION                    | Post-operative chemioradiotherapy               | Sauer R, Liersch T, Merkel S et al. Preoperative versus postoperative chemoradiotherapy for locally advanced rectal cancer: results of the German CAO/ARO-94 randomized phase III trial after a median follow-up of 11 years. <i>J Clin Oncol.</i> 2012 Jun 1;30(16):1926-33. doi: 10.1200/JCO.2011.40.1836.                                                                                                                                                |
| Siegel 2009     | Excluded | NO FINAL DATA REPORTED                | No final data reported, only protocol published | Siegel R, Burock S, Wernecke KD et al. Preoperative short-course radiotherapy versus combined radiochemotherapy in locally advanced rectal cancer: a multi-centre prospectively randomised study of the Berlin Cancer Society. <i>BMC Cancer.</i> 2009 Feb 6;9:50. doi: 10.1186/1471-2407-9-50.                                                                                                                                                             |

|                 |          |                                       |                                          |                                                                                                                                                                                                                                                                                                                                                                                                                            |
|-----------------|----------|---------------------------------------|------------------------------------------|----------------------------------------------------------------------------------------------------------------------------------------------------------------------------------------------------------------------------------------------------------------------------------------------------------------------------------------------------------------------------------------------------------------------------|
| Smith 2015      | Excluded | WRONG INTERVENTION , WRONG COMPARISON | Not randomized, non-operative management | Smith JJ, Chow OS, Gollub MJ et al. Organ Preservation in Rectal Adenocarcinoma: a phase II randomized controlled trial evaluating 3-year disease-free survival in patients with locally advanced rectal cancer treated with chemoradiation plus induction or consolidation chemotherapy, and total mesorectal excision or nonoperative management. <i>BMC Cancer</i> .2015 Oct 23;15:767. doi: 10.1186/s12885-015-1632-z. |
| Tveit 1997      | Excluded | WRONG INTERVENTION                    | Post-operative chemioradiotherapy        | Tveit KM, Guldvog I, Hagen S, et al. Randomized controlled trial of postoperative radiotherapy and short-term time-scheduled 5-fluorouracil against surgery alone in the treatment of Dukes B and C rectal cancer. Norwegian Adjuvant Rectal Cancer Project Group. <i>Br J Surg</i> . 1997;84:1130–1135.                                                                                                                   |
| Wang 2018       | Excluded | WRONG INTERVENTION                    | No preoperative therapy in control group | Wang F, Fan W, Peng J et al. Total mesorectal excision with or without preoperative chemoradiotherapy for resectable mid/low rectal cancer: a long-term analysis of a prospective, single-center, randomized trial. <i>Cancer Commun (Lond)</i> . 2018 Dec 20;38(1):73. doi: 10.1186/s40880-018-0342-8.                                                                                                                    |
| Wang 2018       | Excluded | WRONG DESIGN                          | Single arm                               | Wang X, Yu Y, Meng W et al. Total neoadjuvant treatment (CAPOX plus radiotherapy) for patients with locally advanced rectal cancer with high risk factors: A phase 2 trial. <i>Radiother Oncol</i> . 2018 Nov;129(2):300-305. doi: 10.1016/j.radonc.2018.08.027.                                                                                                                                                           |
| Wong 2012       | Excluded | WRONG INTERVENTION                    | Comparison of two chemotherapy regimens  | Wong SJ, Winter K, Meropol NJ et al. Radiation Therapy Oncology Group 0247: a randomized Phase II study of neoadjuvant capecitabine and irinotecan or capecitabine and oxaliplatin with concurrent radiotherapy for patients with locally advanced rectal cancer. <i>Int J Radiat Oncol Biol Phys</i> . 2012 Mar 15;82(4):1367-75. doi: 10.1016/j.ijrobp.2011.05.027.                                                      |
| Wiśniowska 2016 | Excluded | WRONG DESIGN                          | Subgroup analysis of RCT                 | Wiśniowska K, Nasierowska-Guttmejer A, Polkowski W et al. Does the addition of oxaliplatin to preoperative chemoradiation benefit cT4 or fixed cT3 rectal cancer treatment? A subgroup analysis from a prospective study. <i>Eur J Surg Oncol</i> . 2016 Dec;42(12):1859-1865. doi: 10.1016/j.ejso.2016.08.001.                                                                                                            |
| Wolmark 2000    | Excluded | WRONG INTERVENTION                    | Post-operative chemioradiotherapy        | Wolmark N, Wieand HS, Hyams DM, et al. Randomized trial of postoperative adjuvant chemotherapy with or without radiotherapy for carcinoma of the rectum: National Surgical Adjuvant Breast and Bowel Project Protocol R-02. <i>J Natl Cancer Inst</i> . 2000;92:388–396.                                                                                                                                                   |
| Zhu 2013        | Excluded | WRONG DESIGN                          | Single arm                               | Zhu J, Gu W, Lian P et al. A phase II trial of neoadjuvant IMRT-based chemoradiotherapy followed by one cycle of capecitabine for stage II/III rectal adenocarcinoma. <i>Radiat Oncol</i> . 2013 May 29;8:130. doi: 10.1186/1748-717X-8-130.                                                                                                                                                                               |

**eTable 2. Characteristics of Included Studies**

Legend: pCR=pathologic complete response; AV distance=distance from the anal verge; L-CRT1=long-course chemoradiotherapy with single-agent fluoropyrimidine-based chemotherapy; L-CRT2=long-course chemoradiotherapy with duplex chemotherapy drug (fluoropyrimidine plus oxaliplatin); FU=fluorouracil; OXA=oxaliplatin; Cape=capecitabine; S-RT=short-course radiotherapy; L-RT=long-course radiotherapy; FU-LV=fluorouracil plus leucovorin; NR=not reported; XELOX/CapOX=capecitabine plus oxaliplatin; FOLFIRONOX=oxaliplatin, irinotecan, FU-LV; mFOLFOX6= leucovorin 400 mg/m<sup>2</sup> intravenously followed by fluorouracil 400 mg/m<sup>2</sup> intravenously and fluorouracil 2.4 g/m<sup>2</sup> by 48-h continuous intravenous infusion plus oxaliplatin 85 mg/m<sup>2</sup> on day 1 of each chemotherapy cycle; CHT=chemotherapy. Percentages are computed on the intention-to-treat population.

| First author     | Year | Number of patients | Treatment control arm                   | Treatment experimental arm                                     | Women (%) | Mean age | Mean AV distance (cm) / Range (%) | Clinical stage exp. arm (%) | pCR exp. arm (%) | R0 exp. arm (%) | ypN0 exp. arm (%) | ypT1-2 exp. arm (%) | Mean follow-up (months) |
|------------------|------|--------------------|-----------------------------------------|----------------------------------------------------------------|-----------|----------|-----------------------------------|-----------------------------|------------------|-----------------|-------------------|---------------------|-------------------------|
| Aschele          | 2011 | 739                | L-RT (50.4 Gy) + FU (L-CRT1)            | L-RT (50.4 Gy) + OXA + FU (L-CRT2)                             | 33.0      | 62.5     | Max 12 cm<br><8 cm: 76.9          | cT3-4: 95.1<br>cN+: 66.8    | 16.0             | 91.0            | 67.1              | 35.1                | 105.6                   |
| Bahadoer         | 2021 | 912                | L-RT (50.4 Gy) + Cape (L-CRT1)          | S-RT (25 Gy) → CAPOX x 6 / FOLFOX4 x 9 (S-RT + consolidation)  | 32.6      | 61.0     | Max 16 cm<br><10 cm: 61.5         | cT3-4: 97.0<br>cN+: 90.9    | 26.0             | 82.7            | 68.6              | 22.3                | 74.4                    |
| Bosset           | 2005 | 1011               | L-RT (45 Gy)                            | L-RT (45 Gy) + FU-LV (L-CRT1)                                  | 29.6      | 63.1     | Max 15 cm<br><10 cm: 94.3         | cT3-4: 100<br>cN+: NR       | 12.8             | NR              | 67.2              | 40.5                | 124.8                   |
| Bujko            | 2004 | 312                | S-RT (25 Gy) → TME (7 days) (S-RTearly) | L-RT (50.4 Gy) + FU-LV (L-CRT1)                                | 35.0      | 60.0     | 5.7                               | cT3-4: NR<br>cN+: NR        | 14.0             | 82.8            | 68.0              | 39.5                | 48.0                    |
| Bujko            | 2013 | 515                | L-RT (50.4 Gy) + OXA + FU-LV (L-CRT2)   | S-RT (25 Gy) → FOLFOX4 x 3 (S-RT + consolidation)              | 31.5      | 60.0     | Max 15 cm<br><10 cm: 97.3         | cT3-4: 96.9<br>cN+: NR      | 16.0             | 77.3            | 57.5              | 19.1                | 35.0                    |
| Chakrabarti      | 2021 | 140                | L-RT (50.4 Gy) + Cape (L-CRT1)          | S-RT (25 Gy) → XELOX x 2 (S-RT + consolidation)                | 33.6      | 42.0     | NR                                | cT3-4: 100<br>cN+: 68.1     | 11.6             | 86.9            | 75.3              | 66.7                | NR                      |
| Conroy           | 2021 | 461                | L-RT (50 Gy) + Cape (L-CRT1)            | FOLFIRONOX x 6 → L-RT + Cape (Induction + L-CRT)               | 33.6      | 61.5     | Max 15 cm<br><10 cm: 87%          | cT3-4: 96.1<br>cN+: 89.6    | 25.5             | 87.0            | 75.8              | 30.7                | 47.9                    |
| Deng             | 2016 | 475                | L-RT (46-50.4 Gy) + FU-LV (L-CRT1)      | L-RT (46-50.4 Gy) + mFOLFOX6 (L-CRT2)                          | 34.3      | 54.0     | 5.4                               | cT3-4: 98.2<br>cN+: 81.8    | 25.4             | 81.2            | 50.9              | NR                  | 45.1                    |
|                  |      |                    |                                         | mFOLFOX6 x 4-6 (CHT)                                           | 34.3      | 54.0     | 6                                 | cT3-4: 99.4<br>cN+: 72.1    | 6.1              | 82.4            | 32.7              | NR                  | 45.1                    |
| Fernández-Martos | 2015 | 103                | L-RT + Cape + OXA (L-CRT2)              | XELOX x 4 → L-RT + Cape + OXA (Induction + L-CRT)              | 34.0      | 61.0     | Max 12 cm                         | cT3-4: NR<br>cN+: NR        | 14.3             | 85.7            | 67.9              | NR                  | 69.0                    |
| Fokas            | 2019 | 306                | -                                       | FOLFOX x 3 → L-RT (50.4 Gy) + FU + OXA (Induction + L-CRT)     | 32        | 62.0     | Max 12 cm<br><10 cm: 84.0         | cT3-4: 96.2<br>cN+: 85.9    | 17.3             | 83.3            | 67.3              | 37.2                | 43.0                    |
|                  |      |                    |                                         | L-RT (50.4 Gy) + FU + OXA → FOLFOX x 3 (L-CRT + consolidation) | 33        | 61.0     | Max 12 cm<br><10 cm: 90.0         | cT3-4: 96.7<br>cN+: 90.0    | 25.3             | 85.3            | 74.0              | 27.3                | 43.0                    |
| Gérard           | 2006 | 733                | L-RT (45 Gy)                            | L-RT (45 Gy) + FU-LV (L-CRT1)                                  | 33.5      | 63.5     | NR                                | cT3-4: 98.4<br>cN+: NR      | 10.9             | 90.1            | 67.3              | 29.9                | 81.0                    |

|            |      |      |                                            |                                                                   |      |      |                           |                          |      |                         |      |      |      |
|------------|------|------|--------------------------------------------|-------------------------------------------------------------------|------|------|---------------------------|--------------------------|------|-------------------------|------|------|------|
| Gérard     | 2010 | 598  | L-RT (45 Gy) + Cape (L-CRT1)               | L-RT (45 Gy) + CapOX (L-CRT2)                                     | 46.0 | 62.0 | NR                        | cT3-4: 92.7<br>cN+: 72.5 | 18.9 | 44.0<br>(44.0% missing) | 69.1 | 30.5 | 60.2 |
| Haddad     | 2017 | 63   | L-RT (50-50.4 Gy) + Cape (L-CRT1)          | L-RT (50-50.4 Gy) + CapOX (L-CRT2)                                | 31.7 | 57.0 | 6.2                       | cT3-4: 97.0<br>cN+: 93.5 | 34.0 | NR                      | NR   | NR   | NR   |
| Jiao       | 2015 | 206  | L-RT (50 Gy) + Cape (L-CRT1)               | L-RT (50 Gy) + XELOX (L-CRT2)                                     | 44.2 | 55.8 | Max 12 cm<br><8 cm: 79.6  | cT3-4: 98.1<br>cN+: 78.6 | 23.3 | 97.1                    | 71.8 | 39.8 | 48.7 |
| Jin        | 2022 | 599  | L-RT (50 Gy) + Cape (L-CRT1)               | S-RT (25 Gy) → CapOX x 4 (S-RT + consolidation)                   | 29.0 | 55.5 | Max 10 cm<br><5 cm: 49.3  | cT3-4: 98.9<br>cN+: 86.9 | 13.1 | 72.1                    | 56.0 | 27.5 | 35.0 |
| Kim        | 2018 | 110  | L-RT (50.4 Gy) + Cape (L-CRT1)             | L-RT (50.4 Gy) + Cape → CapOX x 2 (L-CRT + consolidation)         | 24.0 | 55.5 | 5.5                       | cT3-4: 100<br>cN+: 92.5  | 11.3 | 90.6                    | 52.8 | 24.5 | NR   |
| Latkauskas | 2012 | 150  | S-RT (25 Gy) → TME (6 weeks) (S-RTdelayed) | L-RT (50 Gy) + FU-LV (L-CRT1)                                     | 33.6 | 64.0 | Max 15 cm<br><10 cm: 89.3 | cT3-4: NR<br>cN+: 76.0   | 10.6 | 85.3                    | 72.0 | 32   | 39.7 |
| Maréchal   | 2012 | 57   | L-RT (45 Gy) + FU (L-CRT1)                 | mFOLFOX6 x 2 → L-RT (45 Gy) + FU (Induction + L-CRT)              | 35.0 | 62.0 | NR                        | cT3-4: 96.4<br>cN+: NR   | 25.0 | 96.4                    | 46.4 | 21.4 | NR   |
| Mei        | 2023 | 589  | L-RT (50 Gy) + Cape (L-CRT1)               | CapOX x 4 (CHT)                                                   | 38.0 | 60.0 | Max 12 cm<br><10 cm: 96.6 | cT3-4: 94.7<br>cN+: 69.3 | 10.0 | 90.3                    | 66.7 | 29.3 | NR   |
| Mohiuddin  | 2006 | 103  | L-RT (45.6 Gy) + FU (L-CRT1)               | L-RT (45 Gy) + Irinotecan + FU (L-CRT2)                           | 34.0 | 57.0 | Max 9 cm                  | cT3-4: 100<br>cN+: NR    | 26.4 | NR                      | NR   | NR   | NR   |
| Moore      | 2017 | 49   | L-RT (50.4 Gy) + FU (L-CRT1)               | L-RT (50.4 Gy) + FU → FU x 3 (L-CRT + consolidation)              | 26.5 | 60.0 | 6.3                       | cT3-4: 100<br>cN+: 100   | 16.0 | 92.0                    | 64.0 | 24.0 | NR   |
| Ngan       | 2012 | 323  | S-RT (25 Gy) → TME (7 days) (S-RTearly)    | L-RT (50.4 Gy) + FU (L-CRT1)                                      | 27.0 | 63.5 | 6.6                       | cT3-4: 100<br>cN+: 37.9  | 14.9 | 93.7                    | 63.3 | 29.2 | 70.8 |
| O'Connell  | 2014 | 1276 | L-RT (50.4 Gy) + FU or Cape (L-CRT1)       | L-RT (50.4 Gy) + FU + Oxa or CapOX (L-CRT2)                       | 32.0 | NR   | Max 12 cm                 | cT3-4: NR<br>cN+: NR     | 19.5 | NR                      | NR   | NR   | 54   |
| Rodel      | 2015 | 1232 | L-RT (50.4 Gy) + FU (L-CRT1)               | L-RT (50.4 Gy) + FU + OXA (L-CRT2)                                | 29.0 | 62.0 | Max 12 cm<br><10 cm: 89.8 | cT3-4: 96.2<br>cN+: 73.7 | 17.0 | 92.3                    | 67.9 | 32.9 | 49.6 |
| Schmoll    | 2021 | 1068 | L-RT (45-50.4 Gy) + Cape (L-CRT1)          | L-RT (45-50.4 Gy) + CapOX (L-CRT2)                                | 29.2 | 62   | Max 12 cm<br>≤5 cm: 45.1  | cT3-4: 97.5<br>cN+: 74.1 | 14.0 | 95.8                    | NR   | NR   | 64.0 |
| Schrag     | 2023 | 1128 | L-RT (50.4 Gy) + FU or Cape (L-CRT1)       | mFOLFOX6 x 6 (CHT) (+ selective L-CRT in 53 patients)             | 34.5 | 57.2 | 8.6                       | cT3-4: 89.0<br>cN+: 60.2 | 20.0 | 90.4                    | 68.4 | 40.8 | 58.0 |
| Wang       | 2019 | 120  | L-RT (50 Gy) + CapOX (L-CRT2)              | L-RT (50 Gy + 5 Gy boost) + CapOX → XELOX (L-CRT + consolidation) | 30.0 | NR   | Max 12 cm<br>≤5 cm: 66.7  | cT3-4: 100<br>cN+: 76.7  | 23.3 | NR                      | 65.0 | 40.0 | 42.0 |

**eTable 3.** Summary of Inclusion and Exclusion Criteria of Included Studies

| First author     | Year | cT2 | cT3 | cT4 | cN+           | Threatened/involved MRF | EMVI +        | Recurrent cancers | Distance from AV                |
|------------------|------|-----|-----|-----|---------------|-------------------------|---------------|-------------------|---------------------------------|
| Aschele          | 2011 |     |     |     |               |                         | Not specified |                   | 12 cm                           |
| Bahadoer         | 2021 |     |     |     |               |                         |               |                   | 16 cm                           |
| Bosset           | 2005 |     |     |     | Not specified | Not specified           | Not specified |                   | 15 cm                           |
| Bujko            | 2004 |     |     |     | Not specified | Not specified           | Not specified |                   | Inferior margin palpable on DRE |
| Bujko            | 2013 |     |     |     | Not specified |                         | Not specified |                   | 15 cm                           |
| Chakrabarti      | 2021 |     |     |     |               | Not specified           | Not specified |                   | Mid-lower rectum                |
| Conroy           | 2021 |     |     |     |               | Not specified           | Not specified |                   | 15 cm                           |
| Deng             | 2016 |     |     |     |               | Not specified           | Not specified |                   | 12 cm                           |
| Fernández-Martos | 2015 |     |     |     |               | Not specified           | Not specified |                   | 12 cm                           |
| Fokas            | 2019 |     |     |     |               | Not specified           |               |                   | 12 cm                           |
| Gérard           | 2006 |     |     |     | Not specified | Not specified           | Not specified |                   | Accessible to DRE               |
| Gérard           | 2010 |     |     |     | Not specified | Not specified           | Not specified |                   | Accessible to DRE               |
| Haddad           | 2017 |     |     |     |               | Not specified           | Not specified |                   | 15 cm                           |
| Jiao             | 2015 |     |     |     |               | Not specified           | Not specified |                   | 12 cm                           |
| Jin              | 2022 |     |     |     |               | Not specified           | Not specified |                   | Mid-lower rectum                |
| Kim              | 2018 |     |     |     | Not specified | Not specified           | Not specified |                   | 12 cm                           |
| Latkauskas       | 2012 |     |     |     |               | Not specified           | Not specified |                   | 15 cm                           |
| Maréchal         | 2012 |     |     |     |               | Not specified           | Not specified |                   | Not specified                   |
| Mei              | 2023 |     |     |     |               |                         | Not specified |                   | 12 cm                           |
| Mohiuddin        | 2006 |     |     |     | Not specified | Not specified           | Not specified |                   | 9 cm                            |
| Moore            | 2017 |     |     |     |               |                         |               |                   | 12 cm                           |
| Ngan             | 2012 |     |     |     |               | Not specified           | Not specified |                   | 12 cm                           |
| O'Connell        | 2014 |     |     |     |               | Not specified           | Not specified |                   | 12 cm                           |
| Rodel            | 2015 |     |     |     |               | Not specified           | Not specified |                   | 12 cm                           |
| Schmoll          | 2021 |     |     |     |               | Not specified           | Not specified |                   | 12 cm                           |
| Schrag           | 2023 |     |     |     |               |                         | Not specified |                   | 12 cm                           |
| Wang             | 2019 |     |     |     |               | Not specified           | Not specified |                   | 12 cm                           |

**eFigure 2. Risk of bias of included studies**

**Risk of Bias Summary**

Total number of studies = 27

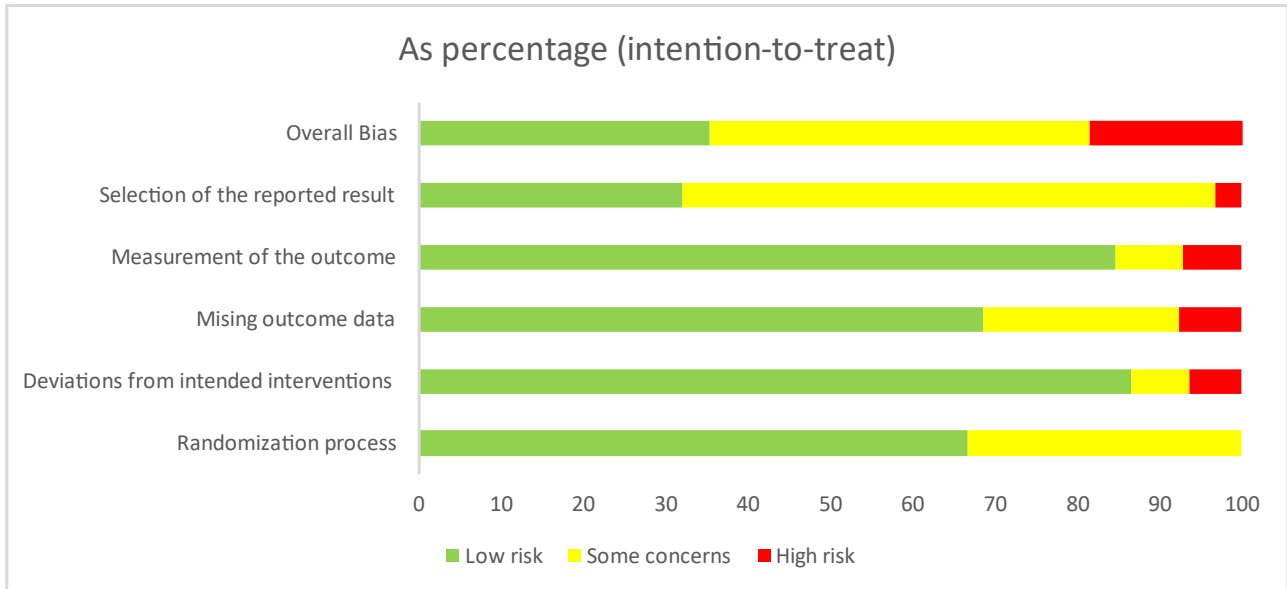

|               | Randomization process | Deviations from intended interventions | Missing outcome data | Measurement of the outcome | Selection of the reported result | Overall Bias |
|---------------|-----------------------|----------------------------------------|----------------------|----------------------------|----------------------------------|--------------|
| Low risk      | 66,7%                 | 92,5%                                  | 92,5%                | 74,1%                      | 63%                              | 33,3%        |
| Some concerns | 33,3%                 | 0%                                     | 3,7%                 | 25,9%                      | 7%                               | 55,6%        |
| High risk     | 0%                    | 7,5%                                   | 3,7%                 | 0%                         | 0%                               | 11,1%        |

# Risk of Bias Graph

| Unique ID         | Study ID | Experimental | Comparator | Outcome | Weight | D1 | D2 | D3 | D4 | D5 | Overall |                                                                                                                                                                                                                                                                                                    |
|-------------------|----------|--------------|------------|---------|--------|----|----|----|----|----|---------|----------------------------------------------------------------------------------------------------------------------------------------------------------------------------------------------------------------------------------------------------------------------------------------------------|
| Aschele 2011      | 1        | NA           | NA         | NA      | NA     | +  | +  | +  | +  | !  | !       |  Low risk<br> Some concerns<br> High risk |
| Bahadoer 2021     | 2        | NA           | NA         | NA      | NA     | +  | +  | +  | +  | +  | +       |                                                                                                                                                                                                                                                                                                    |
| Bosset 2005       | 3        | NA           | NA         | NA      | NA     | +  | +  | +  | +  | +  | +       |                                                                                                                                                                                                                                                                                                    |
| Bujko 2004        | 4        | NA           | NA         | NA      | NA     | +  | +  | +  | !  | !  | !       | D1 Randomisation process<br>D2 Deviations from the intended interventions<br>D3 Missing outcome data<br>D4 Measurement of the outcome<br>D5 Selection of the reported result                                                                                                                       |
| Bujko (2) 2013    | 5        | NA           | NA         | NA      | NA     | +  | +  | +  | !  | +  | !       |                                                                                                                                                                                                                                                                                                    |
| Chakrabarty 2016  | 6        | NA           | NA         | NA      | NA     | !  | +  | +  | +  | !  | !       |                                                                                                                                                                                                                                                                                                    |
| Conroy 2021       | 7        | NA           | NA         | NA      | NA     | +  | +  | +  | +  | +  | +       |                                                                                                                                                                                                                                                                                                    |
| Deng 2016         | 8        | NA           | NA         | NA      | NA     | +  | +  | +  | !  | +  | !       |                                                                                                                                                                                                                                                                                                    |
| Fernandez-Ma 2019 | 9        | NA           | NA         | NA      | NA     | !  | +  | +  | !  | +  | !       |                                                                                                                                                                                                                                                                                                    |
| Fokas 2019        | 10       | NA           | NA         | NA      | NA     | +  | +  | +  | +  | +  | +       |                                                                                                                                                                                                                                                                                                    |
| Gerard 2006       | 11       | NA           | NA         | NA      | NA     | +  | +  | +  | +  | !  | !       |                                                                                                                                                                                                                                                                                                    |
| Gerard (2) 2011   | 12       | NA           | NA         | NA      | NA     | +  | +  | +  | +  | !  | !       |                                                                                                                                                                                                                                                                                                    |
| Haddad 2017       | 13       | NA           | NA         | NA      | NA     | !  | +  | !  | +  | !  | !       |                                                                                                                                                                                                                                                                                                    |
| Jiao 2015         | 14       | NA           | NA         | NA      | NA     | +  | +  | +  | +  | !  | !       |                                                                                                                                                                                                                                                                                                    |
| Jin 2022          | 15       | NA           | NA         | NA      | NA     | +  | +  | !  | +  | +  | !       |                                                                                                                                                                                                                                                                                                    |
| Kim 2018          | 16       | NA           | NA         | NA      | NA     | !  | +  | +  | +  | +  | !       |                                                                                                                                                                                                                                                                                                    |
| Latkauskas 2017   | 17       | NA           | NA         | NA      | NA     | !  | !  | +  | !  | !  | !       |                                                                                                                                                                                                                                                                                                    |
| Marechal 2012     | 18       | NA           | NA         | NA      | NA     | +  | +  | +  | +  | !  | !       |                                                                                                                                                                                                                                                                                                    |
| Mei 2023          | 19       | NA           | NA         | NA      | NA     | +  | +  | +  | +  | +  | +       |                                                                                                                                                                                                                                                                                                    |
| Mohiuddin 2020    | 20       | NA           | NA         | NA      | NA     | !  | +  | +  | +  | !  | !       |                                                                                                                                                                                                                                                                                                    |
| Moore 2017        | 21       | NA           | NA         | NA      | NA     | +  | +  | +  | +  | +  | +       |                                                                                                                                                                                                                                                                                                    |
| Ngan 2012         | 22       | NA           | NA         | NA      | NA     | !  | +  | +  | !  | +  | !       |                                                                                                                                                                                                                                                                                                    |
| O'Connell 2014    | 23       | NA           | NA         | NA      | NA     | !  | +  | +  | +  | +  | !       |                                                                                                                                                                                                                                                                                                    |
| Rodel 2015        | 24       | NA           | NA         | NA      | NA     | +  | +  | +  | +  | +  | +       |                                                                                                                                                                                                                                                                                                    |
| Schmoll 2021      | 25       | NA           | NA         | NA      | NA     | +  | +  | +  | +  | +  | +       |                                                                                                                                                                                                                                                                                                    |
| Schrag 2023       | 27       | NA           | NA         | NA      | NA     | !  | !  | +  | !  | +  | !       |                                                                                                                                                                                                                                                                                                    |
| Wang 2019         | 26       | NA           | NA         | NA      | NA     | +  | +  | +  | +  | +  | +       |                                                                                                                                                                                                                                                                                                    |



**eFigure 3. Transitivity Assessment and Meta-Regression**

**Continuous variables**

We represented the distribution of the variable within each treatment strategy as a boxplots and performed the Kruskal-Wallis equality-of-populations rank test. The results of the meta-regression analyses are also reported.

| Potential effect modifiers    | Boxplot                                                                             | Kruskal-Wallis equality-of-populations rank test      | Meta-regression analysis                          |
|-------------------------------|-------------------------------------------------------------------------------------|-------------------------------------------------------|---------------------------------------------------|
| Year of publication           | 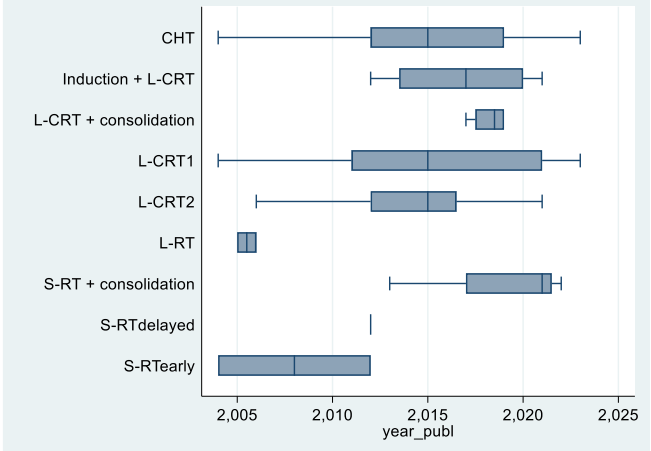  | chi-squared with ties = 15.938 with 8 d.f. p = 0.0433 | Coeff. = -0.1293549<br>SE = 0.093929<br>p = 0.168 |
| Mean follow-up length (weeks) |  | chi-squared with ties = 11.771 with 8 d.f. p = 0.1617 | Coeff. = -0.034571<br>SE = 0.7435485<br>p = 0.963 |

|                                          |  |                                                              |                                                             |
|------------------------------------------|--|--------------------------------------------------------------|-------------------------------------------------------------|
| <p>Mean age</p>                          |  | <p>chi-squared with ties = 12.639 with 8 d.f. p = 0.1249</p> | <p>Coeff. = -0.1482965<br/>SE = 0.1358809<br/>p = 0.275</p> |
| <p>Proportion of female participants</p> |  | <p>chi-squared with ties = 10.355 with 8 d.f. p = 0.2410</p> | <p>Coeff. = -0.1126564<br/>SE = 0.1946762<br/>p = 0.563</p> |
| <p>Proportion of cT4</p>                 |  | <p>chi-squared with ties = 8.001 with 7 d.f. p = 0.3325</p>  | <p>Coeff. = 0.0206261<br/>SE = 0.0198416<br/>p = 0.299</p>  |

|                          |  |                                                                 |                                                             |
|--------------------------|--|-----------------------------------------------------------------|-------------------------------------------------------------|
| <p>Proportion of cN+</p> |  | <p>chi-squared with ties = 9.388 with 7 d.f.<br/>p = 0.1529</p> | <p>Coeff. = 0.0552351<br/>SE = 0.0434548<br/>p = 0.204</p>  |
| <p>Mean AV distance</p>  |  | <p>chi-squared with ties = 6.145 with 8 d.f.<br/>p = 0.6309</p> | <p>Coeff. = -0.2150342<br/>SE = 0.2321012<br/>p = 0.354</p> |
| <p>Proportion of pT4</p> |  | <p>chi-squared with ties = 2.364 with 8 d.f.<br/>p = 0.9678</p> | <p>Coeff. = 0.0070797<br/>SE = 0.0613205<br/>p = 0.908</p>  |

**eAppendix 2.** Primary Outcome: Patients With Pathologic Complete Response (PCR)

**Characteristics of the network**

Number of treatments:

9

Number of studies:

27

Number of individuals included:

13413

Number of individuals randomized to each treatment:

|   | Treatment name        | N. individuals randomized |
|---|-----------------------|---------------------------|
| 1 | CHT                   | 1050                      |
| 2 | Induction + L-CRT     | 469                       |
| 3 | L-CRT + consolidation | 288                       |
| 4 | L-CRT1                | 6084                      |
| 5 | L-CRT2                | 3169                      |
| 6 | L-RT                  | 872                       |
| 7 | S-RT + consolidation  | 1090                      |
| 8 | S-RTdelayed           | 75                        |
| 9 | S-RTearly             | 316                       |

**Pairwise meta-analysis**

Risk ratios above 1 favor the first treatment of the comparison.

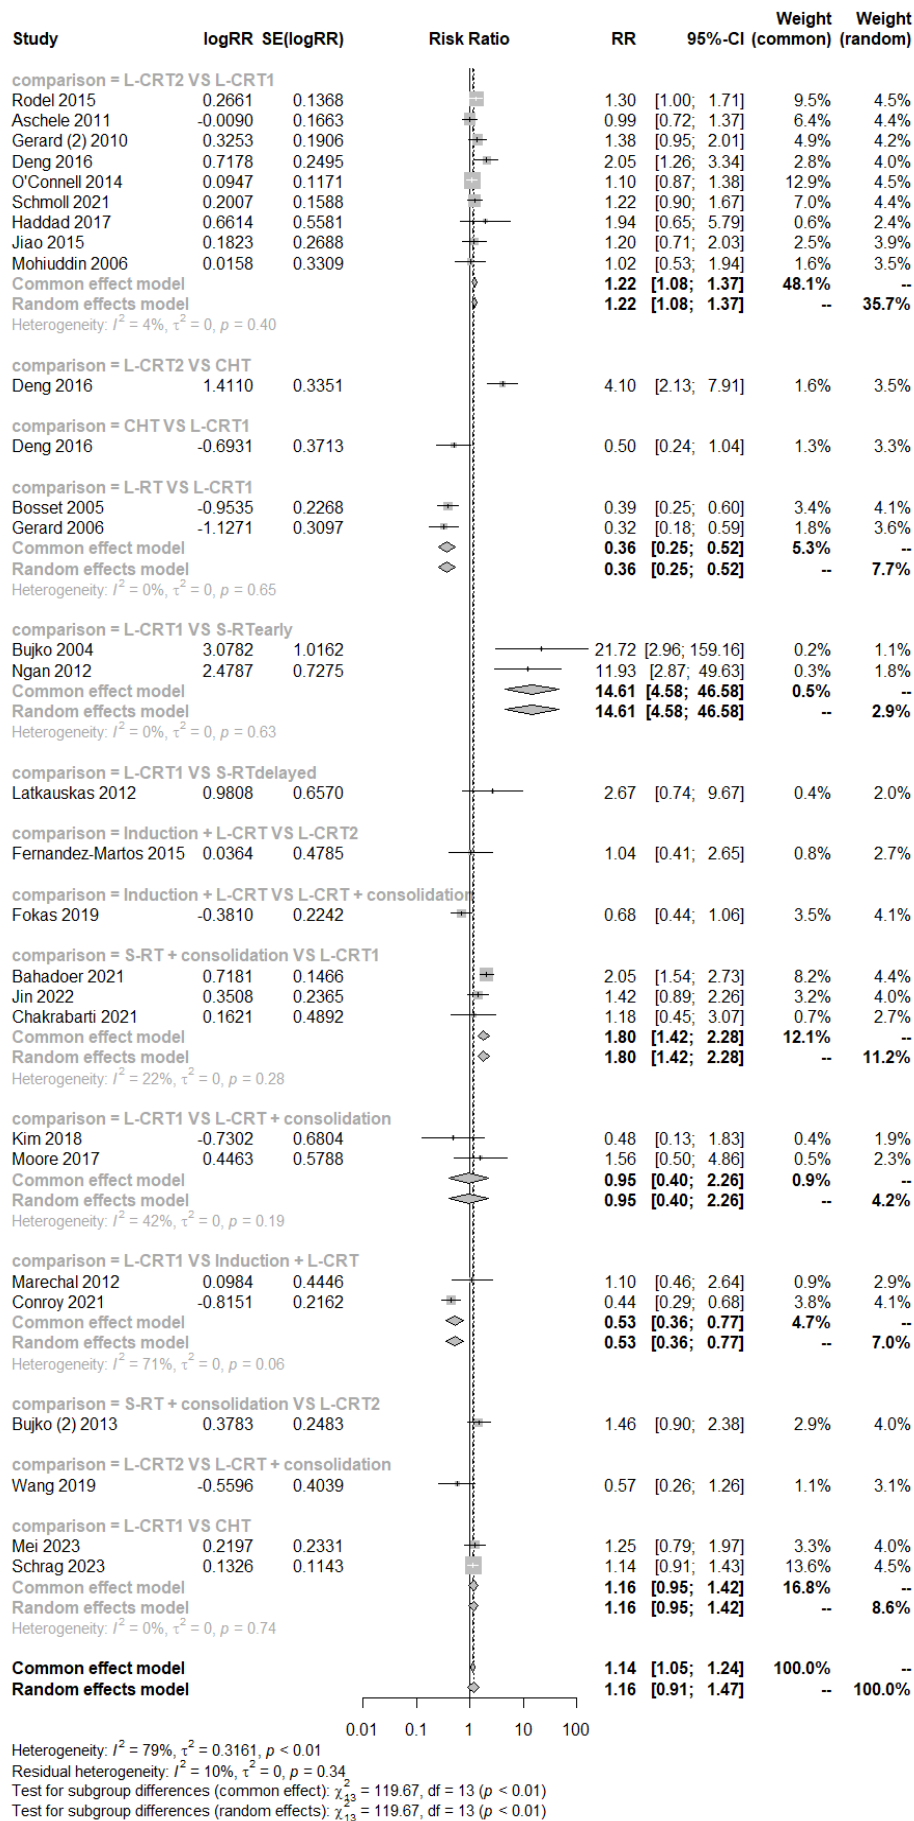

**Network map** The thickness of lines is proportional to the number of studies comparing the two treatments and the size of circles is proportional to the number of individuals for each treatment.

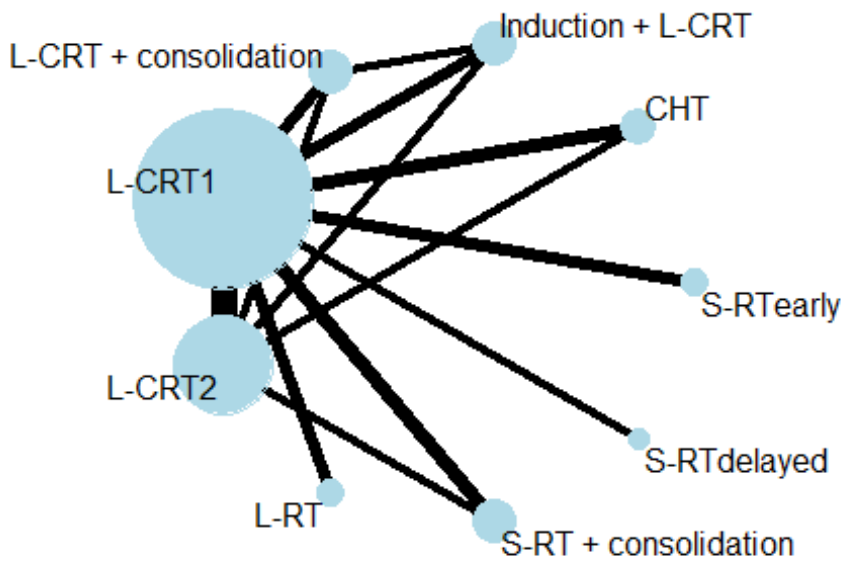

**Netleague table** Relative risks (RRs) and 95% confidence intervals (CIs) are reported. Results of the network meta-analysis are reported in the lower left part of the table and results from the pairwise meta-analysis are reported in the upper right part of the table. RRs higher than 1 favor the column-defining treatment.

|   | V1                    | V2                    | V3                     | V4                    | V5                    | V6                   | V7                    | V8                   | V9                    |
|---|-----------------------|-----------------------|------------------------|-----------------------|-----------------------|----------------------|-----------------------|----------------------|-----------------------|
| 1 | CHT                   | .                     | .                      | 0.80 (0.61 to 1.05)   | 0.24 (0.12 to 0.50)   | .                    | .                     | .                    | .                     |
| 2 | 0.48 (0.30 to 0.75)   | Induction + L-CRT     | 0.68 (0.41 to 1.15)    | 1.83 (1.17 to 2.84)   | 1.04 (0.39 to 2.75)   | .                    | .                     | .                    | .                     |
| 3 | 0.38 (0.23 to 0.65)   | 0.80 (0.53 to 1.22)   | L-CRT + consolidation  | 1.05 (0.43 to 2.55)   | 1.75 (0.76 to 4.04)   | .                    | .                     | .                    | .                     |
| 4 | 0.75 (0.57 to 0.98)   | 1.57 (1.09 to 2.25)   | 1.95 (1.25 to 3.06)    | L-CRT1                | 0.81 (0.69 to 0.94)   | 2.77 (1.84 to 4.18)  | 0.58 (0.43 to 0.78)   | 2.67 (0.71 to 9.95)  | 14.65 (4.51 to 47.52) |
| 5 | 0.59 (0.44 to 0.80)   | 1.24 (0.85 to 1.80)   | 1.54 (0.98 to 2.43)    | 0.79 (0.68 to 0.92)   | L-CRT2                | .                    | 0.69 (0.39 to 1.20)   | .                    | .                     |
| 6 | 2.07 (1.27 to 3.39)   | 4.34 (2.51 to 7.50)   | 5.41 (2.94 to 9.94)    | 2.77 (1.84 to 4.18)   | 3.52 (2.27 to 5.44)   | L-RT                 | .                     | .                    | .                     |
| 7 | 0.42 (0.29 to 0.62)   | 0.89 (0.57 to 1.39)   | 1.11 (0.66 to 1.87)    | 0.57 (0.43 to 0.74)   | 0.72 (0.54 to 0.96)   | 0.21 (0.13 to 0.34)  | S-RT + consolidation  | .                    | .                     |
| 8 | 1.99 (0.52 to 7.64)   | 4.18 (1.07 to 16.36)  | 5.20 (1.30 to 20.91)   | 2.67 (0.71 to 9.95)   | 3.38 (0.90 to 12.72)  | 0.96 (0.24 to 3.82)  | 4.69 (1.22 to 17.97)  | S-RTdelayed          | .                     |
| 9 | 10.94 (3.27 to 36.61) | 22.94 (6.70 to 78.58) | 28.58 (8.11 to 100.74) | 14.65 (4.51 to 47.52) | 18.57 (5.67 to 60.84) | 5.28 (1.52 to 18.38) | 25.76 (7.70 to 86.14) | 5.49 (0.94 to 32.11) | S-RTearly             |

**Forest plot** L-CRT-1 was used as a common comparator. RRs above 1 favor the strategy over the common comparator (L-CRT1).

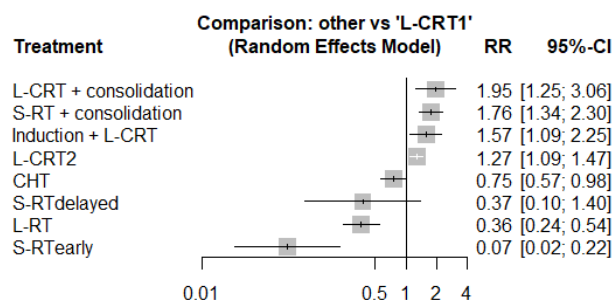

**Assessment of heterogeneity and consistency**

*Global heterogeneity*

We interpreted  $\tau^2$  as follows: heterogeneity low with  $\tau^2 \leq 0.010$ , moderate with  $0.010 < \tau^2 \leq 0.242$ , high with  $\tau^2 > 0.242$ , and  $I^2$  statistics as follows: not important (0%-40%), moderate (30%-60%), substantial (50%-90%), considerable (75%-100%).

$\tau^2 = 0.0194$  ;  $\tau = 0.1393$

$I^2 = 26.44\%$  ( 0 % to 56.84 %)

*Consistency: global approach*

Q statistic to assess consistency under the assumption of a full design-by-treatment interaction random effects model

Q statistics to assess homogeneity / consistency

|                 | Q     | df | p-value |
|-----------------|-------|----|---------|
| Total           | 27.19 | 20 | 0.1300  |
| Within designs  | 12.01 | 14 | 0.6058  |
| Between designs | 15.18 | 6  | 0.0189  |

Design-specific decomposition of within-designs Q statistic

| Design                       | Q    | df | p-value |
|------------------------------|------|----|---------|
| L-CRT1:CHT                   | 0.11 | 1  | 0.7373  |
| L-CRT1:Induction + L-CRT     | 3.41 | 1  | 0.0646  |
| L-CRT1:L-CRT + consolidation | 1.73 | 1  | 0.1878  |
| L-CRT1:L-CRT2                | 3.76 | 7  | 0.8073  |
| L-CRT1:L-RT                  | 0.20 | 1  | 0.6512  |
| L-CRT1:S-RT + consolidation  | 2.55 | 2  | 0.2791  |
| L-CRT1:S-RTearly             | 0.23 | 1  | 0.6314  |

Between-designs Q statistic after detaching of single designs

| Detached design                         | Q     | df | p-value |
|-----------------------------------------|-------|----|---------|
| Induction + L-CRT:L-CRT + consolidation | 13.59 | 5  | 0.0184  |
| Induction + L-CRT:L-CRT2                | 14.92 | 5  | 0.0107  |
| L-CRT + consolidation:L-CRT2            | 15.15 | 5  | 0.0097  |
| L-CRT1:CHT                              | 8.27  | 5  | 0.1422  |
| L-CRT1:Induction + L-CRT                | 13.12 | 5  | 0.0223  |
| L-CRT1:L-CRT + consolidation            | 12.23 | 5  | 0.0317  |
| L-CRT1:L-CRT2                           | 9.74  | 5  | 0.0828  |
| L-CRT1:S-RT + consolidation             | 15.18 | 5  | 0.0096  |
| L-CRT2:S-RT + consolidation             | 15.18 | 5  | 0.0096  |
| L-CRT1:CHT:L-CRT2                       | 3.74  | 4  | 0.4421  |

Q statistic to assess consistency under the assumption of a full design-by-treatment interaction random effects model

|                 | Q     | df | p-value | $\tau$ .within | $\tau^2$ .within |
|-----------------|-------|----|---------|----------------|------------------|
| Between designs | 15.18 | 6  | 0.0189  | 0              | 0                |

*Consistency: local approach*

Separate indirect from direct evidence (SIDE) using back-calculation method  
Random effects model:

| comparison                              | k | prop | nma  | direct | indir. | RoR  | z     | p-value |
|-----------------------------------------|---|------|------|--------|--------|------|-------|---------|
| L-CRT1:CHT                              | 3 | 0.97 | 1.34 | 1.25   | 9.82   | 0.13 | -2.61 | 0.0089  |
| CHT:L-CRT2                              | 1 | 0.18 | 0.59 | 0.24   | 0.72   | 0.34 | -2.68 | 0.0073  |
| Induction + L-CRT:L-CRT + consolidation | 1 | 0.67 | 0.80 | 0.68   | 1.11   | 0.62 | -1.06 | 0.2903  |
| L-CRT1:Induction + L-CRT                | 2 | 0.67 | 0.64 | 0.55   | 0.87   | 0.63 | -1.18 | 0.2374  |



|                              |   |      |      |      |      |      |       |        |
|------------------------------|---|------|------|------|------|------|-------|--------|
| Induction + L-CRT:L-CRT2     | 1 | 0.15 | 1.24 | 1.04 | 1.27 | 0.81 | -0.38 | 0.7037 |
| L-CRT1:L-CRT + consolidation | 2 | 0.26 | 0.51 | 0.95 | 0.41 | 2.29 | 1.58  | 0.1135 |
| L-CRT + consolidation:L-CRT2 | 1 | 0.30 | 1.54 | 1.75 | 1.46 | 1.20 | 0.36  | 0.7196 |
| L-CRT1:L-CRT2                | 9 | 0.89 | 0.79 | 0.81 | 0.67 | 1.21 | 0.78  | 0.4332 |
| L-CRT1:S-RT + consolidation  | 3 | 0.78 | 0.57 | 0.58 | 0.54 | 1.07 | 0.21  | 0.8325 |
| L-CRT2:S-RT + consolidation  | 1 | 0.27 | 0.72 | 0.69 | 0.74 | 0.93 | -0.21 | 0.8325 |

Legend:  
 comparison - Treatment comparison  
 k - Number of studies providing direct evidence  
 prop - Direct evidence proportion  
 nma - Estimated treatment effect (RR) in network meta-analysis  
 direct - Estimated treatment effect (RR) derived from direct evidence  
 indir. - Estimated treatment effect (RR) derived from indirect evidence  
 RoR - Ratio of Ratios (direct versus indirect)  
 z - z-value of test for disagreement (direct versus indirect)  
 p-value - p-value of test for disagreement (direct versus indirect)

**Netrank** Higher p-score values indicate higher ranking of treatments

|                       | P-score |
|-----------------------|---------|
| L-CRT + consolidation | 0.9319  |
| S-RT + consolidation  | 0.8769  |
| Induction + L-CRT     | 0.7870  |
| L-CRT2                | 0.6431  |
| L-CRT1                | 0.4901  |
| CHT                   | 0.3574  |
| S-RTdelayed           | 0.2250  |
| L-RT                  | 0.1844  |
| S-RTearly             | 0.0042  |

**eAppendix 3.** Primary Outcome: Assessment of publication bias

We assessed the risk of publication bias only for the comparisons L-CRT2 vs L-CRT1, which included 9 RCTs.

For the remaining comparisons, too few RCTs to assess publication bias were included.

*Funnel plot*

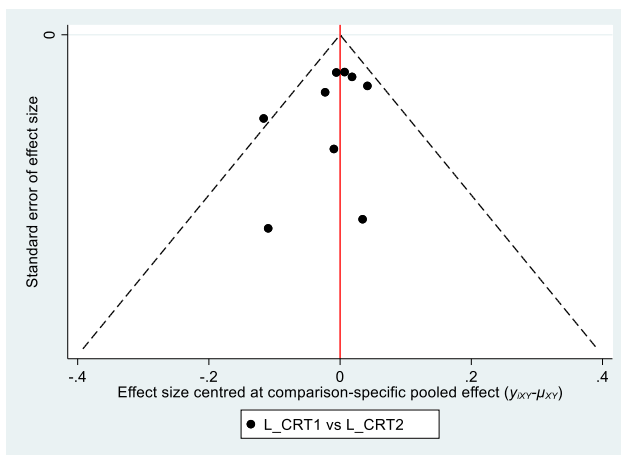

*Egger's test*



#### eAppendix 4. Primary Outcome: Number-needed-to-treat

We calculated the control event rate (CER) by calculating the mean proportion of PCR in individuals receiving L-CRT1, as indicated by Veroniki et al. (J Clin Epidemiol 2019;111:11-22) → 22 RCT; mean 0.14; SD 0.056; range 0.05 to 0.27

Therefore, we calculate the number-needed-to-treat-to-benefit or to-harm (NNTB/NNTH) by applying the formula  $NNT = 1/((1-RR)*CER)$ . Negative values were interpreted as NNTB and positive values as NNTH:

- L-CRT + consolidation vs. L-CRT1: RR 1.95 [1.25; 3.06] → NNTB 7.5 [28.5; 3.5]
- S-RT + consolidation vs. L-CRT1: RR 1.76 [1.34; 2.30] → NNTB 9.4 [21.0; 5.5]
- Induction + L-CRT vs. L-CRT1: RR 1.57 [1.09; 2.25] → NNTB 12.5 [79.4; 5.7]
- L-CRT2 vs. L-CRT1: RR 1.27 [1.09; 1.48] → NNTB 26.4 [79.4; 14.8]
- CHT vs. L-CRT1: RR 0.75 [0.57; 0.98] → NNTH 28.6 [16.6; 357.1]
- S-RTdelayed vs. L-CRT1: RR 0.38 [0.10; 1.40] → NNTH 11.5 [NNTH 7.9; ∞; NNTB 17.8]
- L-RT vs. L-CRT1: RR 0.36 [0.24; 0.54] → NNTH 11.2 [9.4; 15.5]
- S-RTearly vs. L-CRT1: RR 0.07 [0.02; 0.22] → NNTH 7.7 [7.3; 9.1]

## eAppendix 5. Primary Outcome: CINeMA

The analysis of the certainty of the evidence was performed with the online application CINeMA, which follows the principles of the GRADE methodology. The following criteria were applied:

- Within-study bias: the “overall” risk of bias of each study was calculated as follows: (a) LOW risk if all domains of the Cochrane RoB2 were at low risk; (b) HIGH risk if at least one domain was at high risk; (c) UNCLEAR RISK if for at least one domain there were “some concerns”. For each comparison, the histogram was interpreted according to a “Average risk of bias” rule;
- Reporting bias: a “low risk” was considered for all the included studies;
- Indirectness: the histogram was interpreted according to a “Average risk of bias” rule;
- Imprecision, Heterogeneity, Incoherence: Relative effect estimates below 0.67 and above 1.50 are considered clinically important.

### Risk of bias contributions

The bar chart shows the contributions of each piece of study to the network estimate

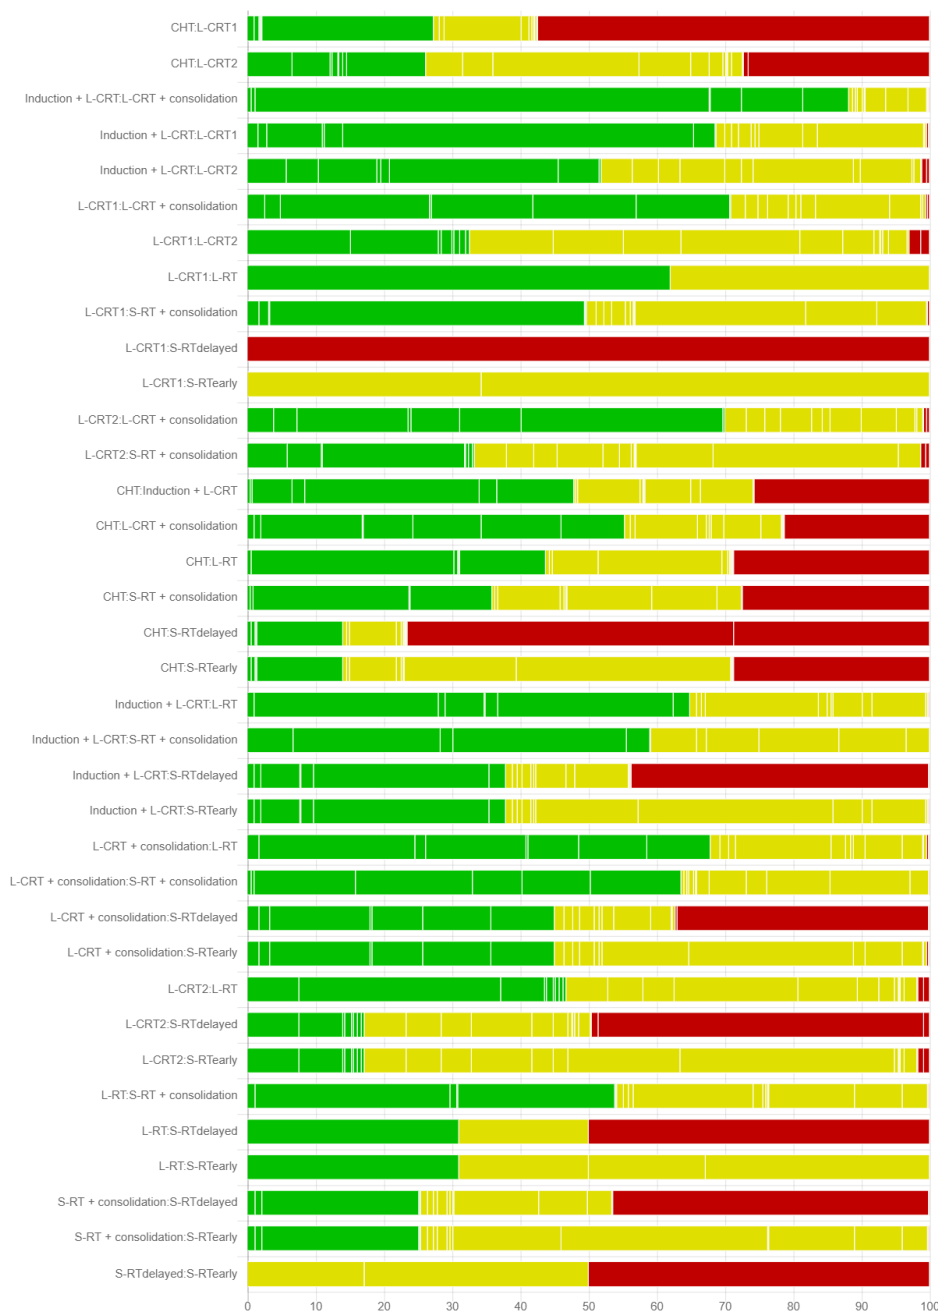

## Indirectness contributions

The bar chart shows the contributions of each study to the network estimate

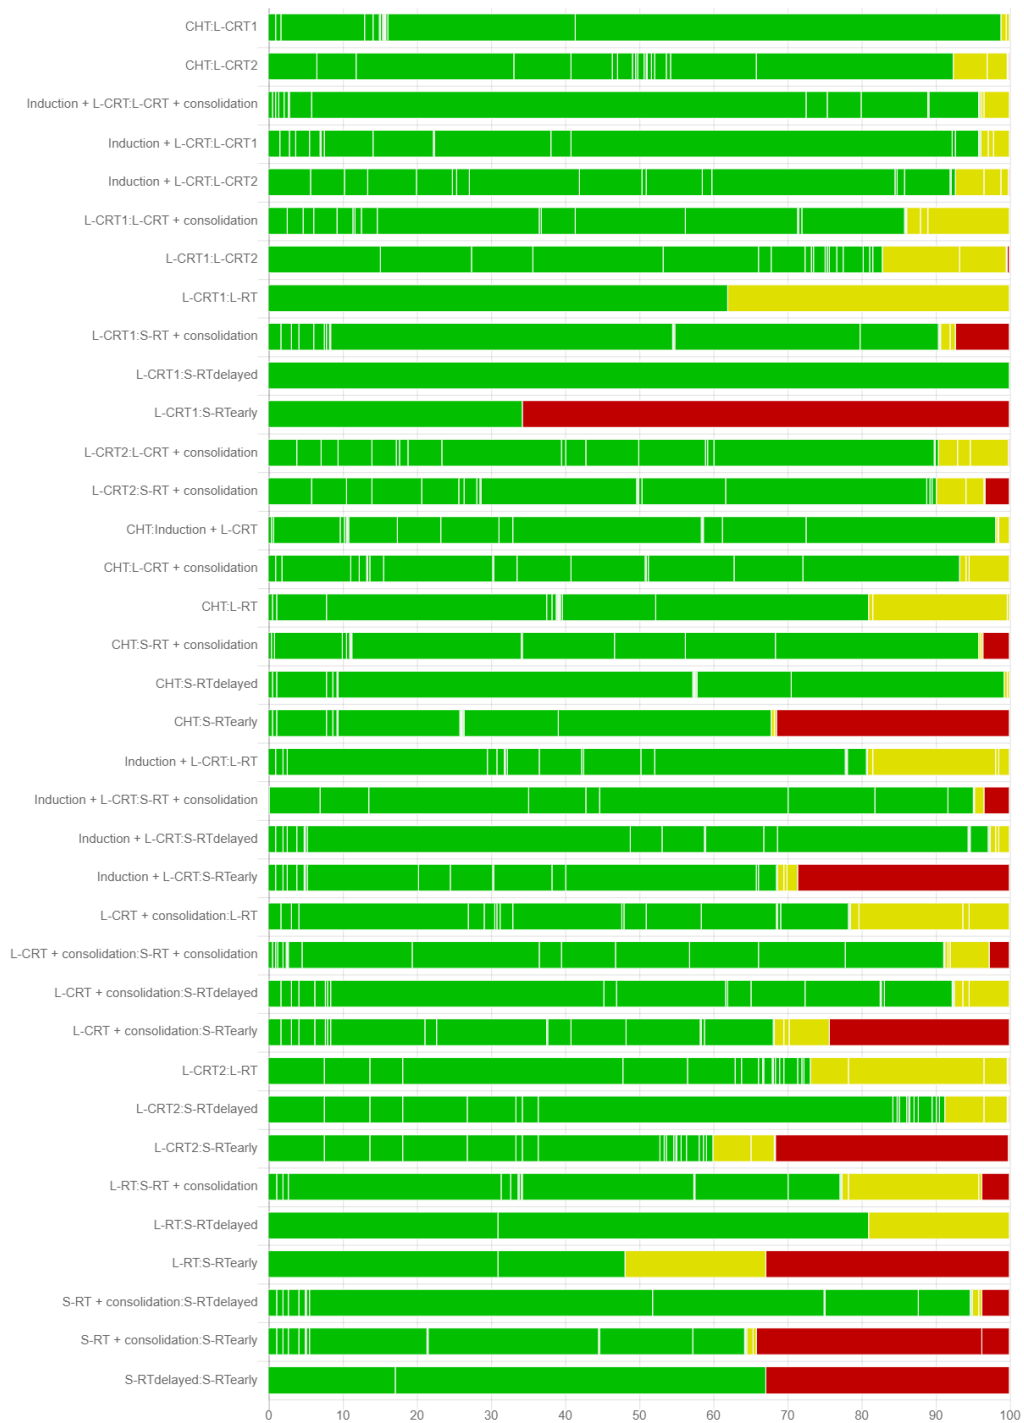

## CINeMA report

| Comparison                                  | Number of studies | Within-study bias | Reporting bias | Indirectness  | Imprecision    | Heterogeneity | Incoherence    | Confidence rating | Reason(s) for downgrading                                            |
|---------------------------------------------|-------------------|-------------------|----------------|---------------|----------------|---------------|----------------|-------------------|----------------------------------------------------------------------|
| CHT vs. L-CRT1                              | 3                 | Some concerns     | Low risk       | No concerns   | No concerns    | Some concerns | Some concerns  | Very low          | ["Within-study bias", "Heterogeneity", "Incoherence"]                |
| CHT vs. L-CRT2                              | 1                 | Some concerns     | Low risk       | No concerns   | No concerns    | No concerns   | Some concerns  | Low               | ["Within-study bias", "Incoherence"]                                 |
| Induction + L-CRT vs. L-CRT + consolidation | 1                 | No concerns       | Low risk       | No concerns   | Some concerns  | No concerns   | No concerns    | Moderate          | ["Imprecision"]                                                      |
| Induction + L-CRT vs. L-CRT1                | 2                 | No concerns       | Low risk       | No concerns   | No concerns    | Some concerns | No concerns    | Moderate          | ["Heterogeneity"]                                                    |
| Induction + L-CRT vs. L-CRT2                | 1                 | No concerns       | Low risk       | No concerns   | Some concerns  | No concerns   | No concerns    | Moderate          | ["Imprecision"]                                                      |
| L-CRT1 vs. L-CRT + consolidation            | 2                 | No concerns       | Low risk       | No concerns   | No concerns    | No concerns   | No concerns    | High              | []                                                                   |
| L-CRT2 vs. L-CRT + consolidation            | 1                 | No concerns       | Low risk       | No concerns   | Some concerns  | No concerns   | No concerns    | Moderate          | ["Imprecision"]                                                      |
| L-CRT1 vs. L-CRT2                           | 9                 | Some concerns     | Low risk       | No concerns   | No concerns    | Some concerns | No concerns    | Low               | ["Within-study bias", "Heterogeneity"]                               |
| L-CRT1 vs. L-RT                             | 2                 | No concerns       | Low risk       | No concerns   | No concerns    | No concerns   | Major concerns | Low               | ["Incoherence"]                                                      |
| L-CRT1 vs. S-RT + consolidation             | 3                 | Some concerns     | Low risk       | No concerns   | No concerns    | No concerns   | No concerns    | Moderate          | ["Within-study bias"]                                                |
| L-CRT1 vs. S-RTdelayed                      | 1                 | Major concerns    | Low risk       | No concerns   | Some concerns  | Some concerns | Major concerns | Very low          | ["Within-study bias", "Imprecision", "Heterogeneity", "Incoherence"] |
| L-CRT1 vs. S-RTearly                        | 2                 | Some concerns     | Low risk       | Some concerns | No concerns    | No concerns   | Major concerns | Very low          | ["Within-study bias", "Indirectness", "Incoherence"]                 |
| L-CRT2 vs. S-RT + consolidation             | 1                 | Some concerns     | Low risk       | No concerns   | No concerns    | Some concerns | No concerns    | Low               | ["Within-study bias", "Heterogeneity"]                               |
| CHT vs. Induction + L-CRT                   | 0                 | Some concerns     | Low risk       | No concerns   | No concerns    | No concerns   | Major concerns | Very low          | ["Within-study bias", "Incoherence"]                                 |
| CHT vs. L-CRT + consolidation               | 0                 | Some concerns     | Low risk       | No concerns   | No concerns    | No concerns   | Major concerns | Very low          | ["Within-study bias", "Incoherence"]                                 |
| CHT vs. L-RT                                | 0                 | Some concerns     | Low risk       | No concerns   | No concerns    | No concerns   | Major concerns | Very low          | ["Within-study bias", "Incoherence"]                                 |
| CHT vs. S-RT + consolidation                | 0                 | Some concerns     | Low risk       | No concerns   | No concerns    | No concerns   | Major concerns | Very low          | ["Within-study bias", "Incoherence"]                                 |
| CHT vs. S-RTdelayed                         | 0                 | Major concerns    | Low risk       | No concerns   | Major concerns | No concerns   | Major concerns | Very low          | ["Within-study bias", "Imprecision", "Incoherence"]                  |
| CHT vs. S-RTearly                           | 0                 | Some concerns     | Low risk       | Some concerns | No concerns    | No concerns   | Major concerns | Very low          | ["Within-study bias", "Indirectness", "Incoherence"]                 |
| Induction + L-CRT vs. L-RT                  | 0                 | No concerns       | Low risk       | No concerns   | No concerns    | No concerns   | Major concerns | Very low          | ["Incoherence"]                                                      |
| Induction + L-CRT vs. S-RT + consolidation  | 0                 | No concerns       | Low risk       | No concerns   | Some concerns  | Some concerns | Major concerns | Very low          | ["Imprecision", "Heterogeneity", "Incoherence"]                      |
| Induction + L-CRT vs. S-RTdelayed           | 0                 | Some concerns     | Low risk       | No concerns   | No concerns    | Some concerns | Major concerns | Very low          | ["Within-study bias", "Heterogeneity", "Incoherence"]                |
| Induction + L-CRT vs. S-RTearly             | 0                 | Some concerns     | Low risk       | Some concerns | No concerns    | No concerns   | Major concerns | Very low          | ["Within-study bias", "Indirectness", "Incoherence"]                 |
| L-CRT + consolidation vs. L-RT              | 0                 | No concerns       | Low risk       | No concerns   | No concerns    | No concerns   | Major concerns | Low               | ["Incoherence"]                                                      |
| L-CRT + consolidation vs.                   | 0                 | No concerns       | Low risk       | No concerns   | Major concerns | No concerns   | Major concerns | Very low          | ["Imprecision", "Incoherence"]                                       |

|                                       |   |                |          |               |                |             |                |          |                                                                     |
|---------------------------------------|---|----------------|----------|---------------|----------------|-------------|----------------|----------|---------------------------------------------------------------------|
| S-RT + consolidation                  |   |                |          |               |                |             |                |          |                                                                     |
| L-CRT + consolidation vs. S-RTdelayed | 0 | Some concerns  | Low risk | No concerns   | No concerns    | No concerns | Major concerns | Very low | ["Within-study bias", "Incoherence"]                                |
| L-CRT + consolidation vs. S-RTearly   | 0 | Some concerns  | Low risk | Some concerns | No concerns    | No concerns | Major concerns | Very low | ["Within-study bias", "Indirectness", "Incoherence"]                |
| L-CRT2 vs. L-RT                       | 0 | Some concerns  | Low risk | No concerns   | No concerns    | No concerns | Major concerns | Very low | ["Within-study bias", "Incoherence"]                                |
| L-CRT2 vs. S-RTdelayed                | 0 | Some concerns  | Low risk | No concerns   | Some concerns  | No concerns | Major concerns | Very low | ["Within-study bias", "Imprecision", "Incoherence"]                 |
| L-CRT2 vs. S-RTearly                  | 0 | Some concerns  | Low risk | Some concerns | No concerns    | No concerns | Major concerns | Very low | ["Within-study bias", "Indirectness", "Incoherence"]                |
| L-RT vs. S-RT + consolidation         | 0 | No concerns    | Low risk | No concerns   | No concerns    | No concerns | Major concerns | Low      | ["Incoherence"]                                                     |
| L-RT vs. S-RTdelayed                  | 0 | Some concerns  | Low risk | No concerns   | Major concerns | No concerns | Major concerns | Very low | ["Within-study bias", "Imprecision", "Incoherence"]                 |
| L-RT vs. S-RTearly                    | 0 | Some concerns  | Low risk | Some concerns | No concerns    | No concerns | Major concerns | Very low | ["Within-study bias", "Indirectness", "Incoherence"]                |
| S-RT + consolidation vs. S-RTdelayed  | 0 | Some concerns  | Low risk | No concerns   | No concerns    | No concerns | Major concerns | Very low | ["Within-study bias", "Incoherence"]                                |
| S-RT + consolidation vs. S-RTearly    | 0 | Some concerns  | Low risk | Some concerns | No concerns    | No concerns | Major concerns | Very low | ["Within-study bias", "Indirectness", "Incoherence"]                |
| S-RTdelayed vs. S-RTearly             | 0 | Major concerns | Low risk | Some concerns | Some concerns  | No concerns | Major concerns | Very low | ["Within-study bias", "Indirectness", "Imprecision", "Incoherence"] |



**eAppendix 6. Primary Outcome: Sensitivity analyses for the primary outcome “PCR”**

**Sensitivity 1 - excluding studies with high risk of bias**

**Characteristics of the network**

Number of treatments:

8

Number of studies:

24

Number of individuals included:

12072

Number of individuals randomized to each treatment:

|   | Treatment name        | N. individuals randomized |
|---|-----------------------|---------------------------|
| 1 | CHT                   | 465                       |
| 2 | Induction + L-CRT     | 469                       |
| 3 | L-CRT + consolidation | 288                       |
| 4 | L-CRT1                | 5435                      |
| 5 | L-CRT2                | 3137                      |
| 6 | L-RT                  | 872                       |
| 7 | S-RT + consolidation  | 1090                      |
| 8 | S-RTearly             | 316                       |

**Pairwise meta-analysis**

Risk ratios above 1 favor the first treatment of the comparison.

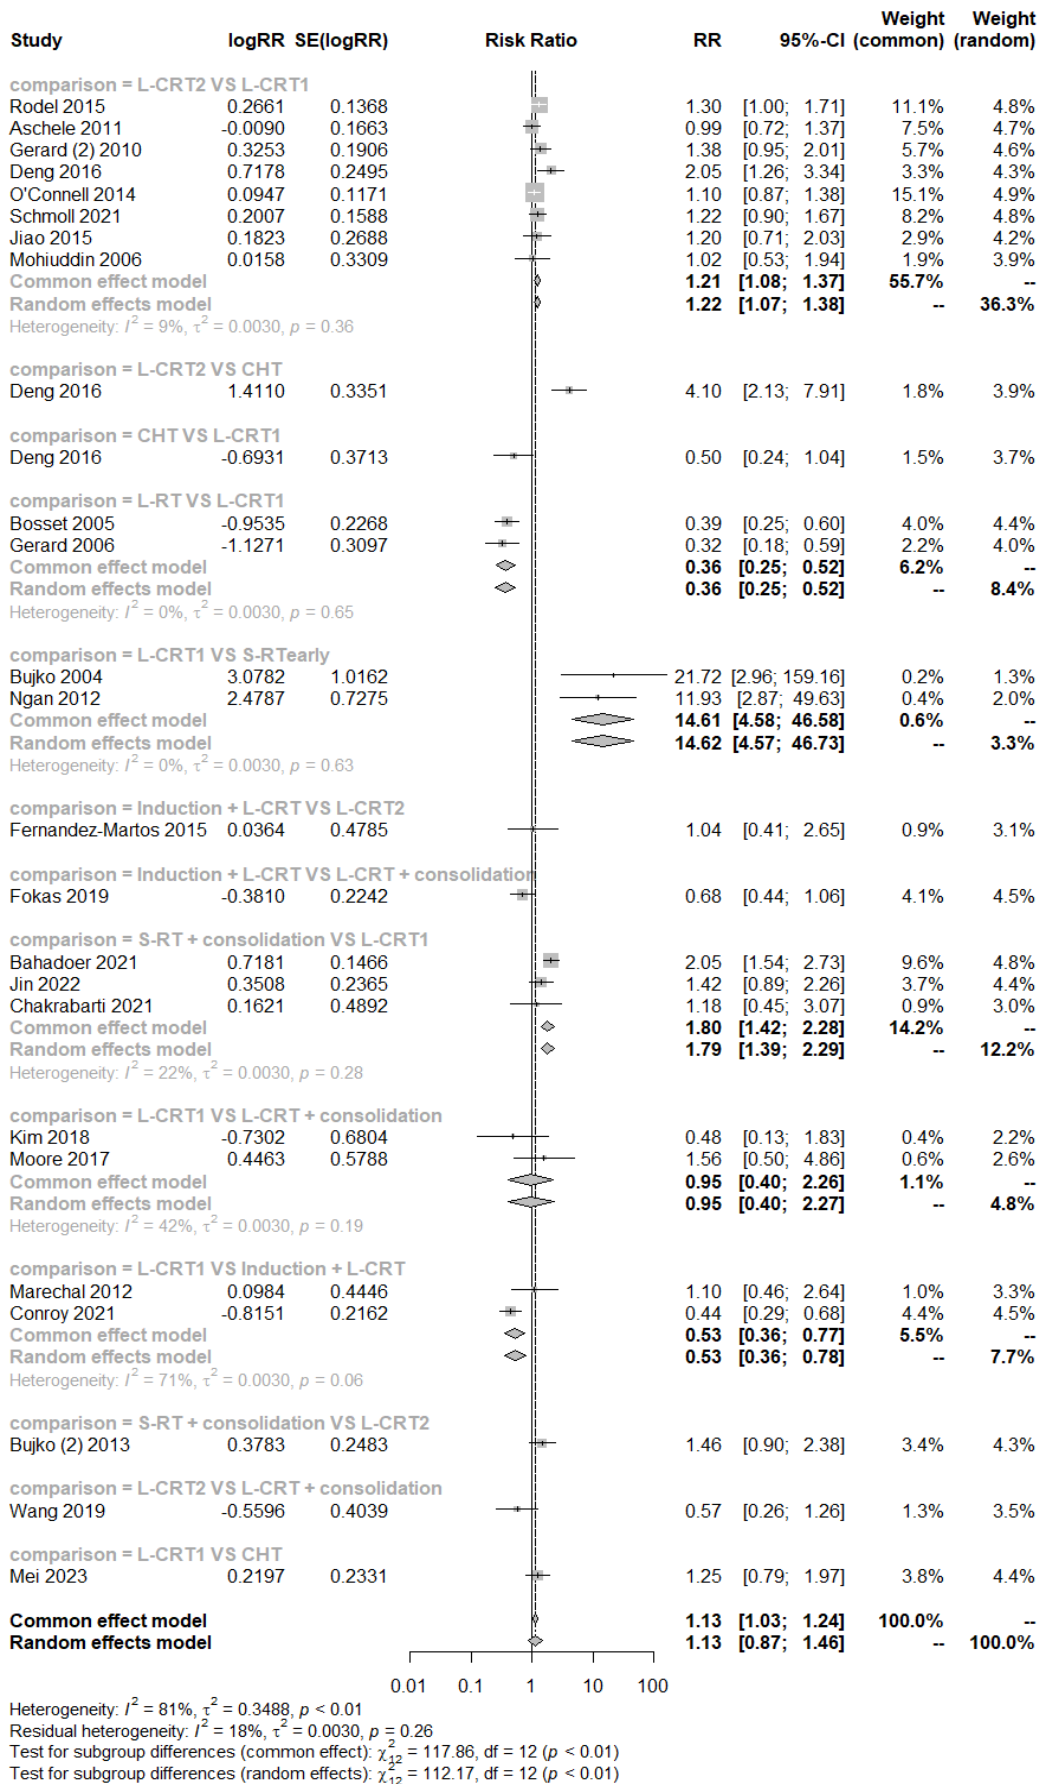

**Network map** The thickness of lines is proportional to the number of studies comparing the two treatments and the size of circles is proportional to the number of individuals for each treatment.

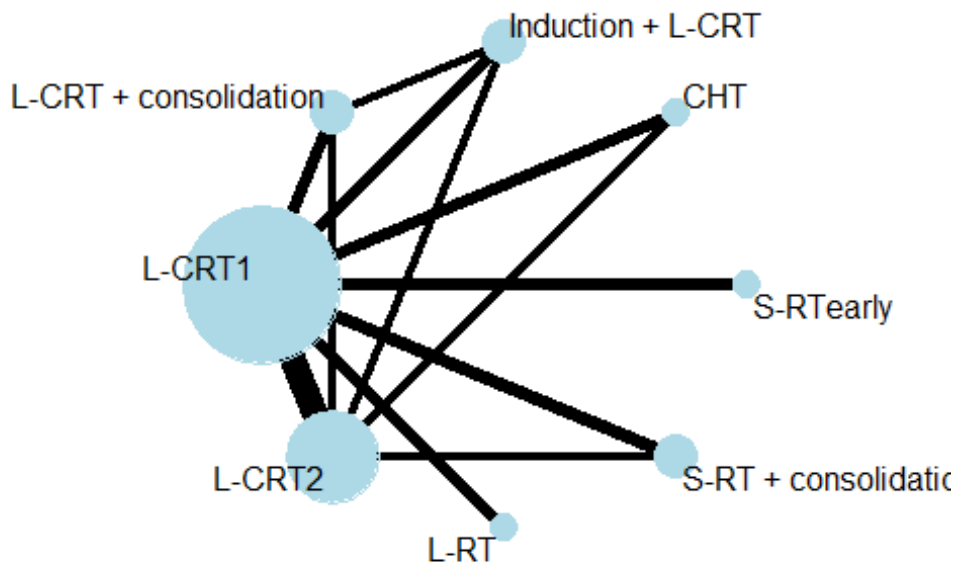

**Netleague table** Relative risks (RRs) and 95% confidence intervals (CIs) are reported. Results of the network meta-analysis are reported in the lower left part of the table and results from the pairwise meta-analysis are reported in the upper right part of the table. RRs higher than 1 favor the column-defining treatment.

|   | V1                   | V2                    | V3                     | V4                    | V5                    | V6                   | V7                    | V8                    |
|---|----------------------|-----------------------|------------------------|-----------------------|-----------------------|----------------------|-----------------------|-----------------------|
| 1 | CHT                  | .                     | .                      | 0.69 (0.45 to 1.07)   | 0.24 (0.12 to 0.49)   | .                    | .                     | .                     |
| 2 | 0.38 (0.22 to 0.66)  | Induction + L-CRT     | 0.68 (0.41 to 1.14)    | 1.83 (1.19 to 2.83)   | 1.04 (0.39 to 2.74)   | .                    | .                     | .                     |
| 3 | 0.31 (0.17 to 0.56)  | 0.80 (0.53 to 1.22)   | L-CRT + consolidation  | 1.05 (0.44 to 2.55)   | 1.75 (0.76 to 4.02)   | .                    | .                     | .                     |
| 4 | 0.60 (0.39 to 0.90)  | 1.57 (1.10 to 2.24)   | 1.95 (1.25 to 3.04)    | L-CRT1                | 0.81 (0.70 to 0.95)   | 2.77 (1.85 to 4.16)  | 0.58 (0.43 to 0.78)   | 14.64 (4.52 to 47.42) |
| 5 | 0.48 (0.31 to 0.73)  | 1.25 (0.86 to 1.82)   | 1.56 (0.99 to 2.45)    | 0.80 (0.69 to 0.93)   | L-CRT2                | .                    | 0.69 (0.39 to 1.19)   | .                     |
| 6 | 1.65 (0.92 to 2.95)  | 4.34 (2.53 to 7.45)   | 5.40 (2.96 to 9.86)    | 2.77 (1.85 to 4.16)   | 3.46 (2.25 to 5.33)   | L-RT                 | .                     | .                     |
| 7 | 0.34 (0.21 to 0.55)  | 0.89 (0.57 to 1.39)   | 1.11 (0.66 to 1.86)    | 0.57 (0.44 to 0.74)   | 0.71 (0.53 to 0.95)   | 0.21 (0.13 to 0.33)  | S-RT + consolidation  | .                     |
| 8 | 8.72 (2.51 to 30.34) | 22.94 (6.72 to 78.33) | 28.55 (8.13 to 100.30) | 14.64 (4.52 to 47.42) | 18.28 (5.59 to 59.76) | 5.29 (1.52 to 18.32) | 25.72 (7.71 to 85.76) | S-RTearly             |

**Forest plot** L-CRT-1 was used as a common comparator. RRs above 1 favor the strategy over the common comparator (L-CRT1).

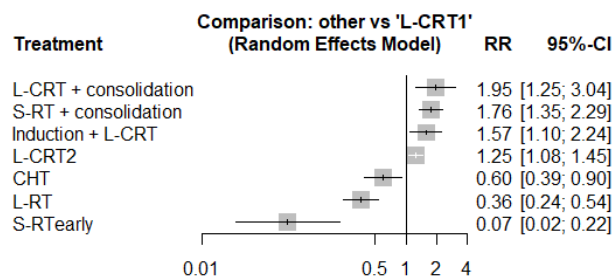

**Assessment of heterogeneity and consistency**

*Global heterogeneity*

We interpreted  $\tau^2$  as follows: heterogeneity low with  $\tau^2 \leq 0.010$ , moderate with  $0.010 < \tau^2 \leq 0.242$ , high with  $\tau^2 > 0.242$ , and  $I^2$  statistics as follows: not important (0%-40%), moderate (30%-60%), substantial (50%-90%), considerable (75%-100%).

$\tau^2 = 0.0173$  ;  $\tau = 0.1316$

$I^2 = 24.42\%$  ( 0 % to 56.69 %)

Consistency: global approach

Q statistic to assess consistency under the assumption of a full design-by-treatment interaction random effects model

Q statistics to assess homogeneity / consistency

|                 | Q     | df | p-value |
|-----------------|-------|----|---------|
| Total           | 23.82 | 18 | 0.1611  |
| Within designs  | 11.10 | 12 | 0.5207  |
| Between designs | 12.72 | 6  | 0.0477  |

Design-specific decomposition of within-designs Q statistic

| Design                       | Q    | df | p-value |
|------------------------------|------|----|---------|
| L-CRT1:Induction + L-CRT     | 3.41 | 1  | 0.0646  |
| L-CRT1:L-CRT + consolidation | 1.73 | 1  | 0.1878  |
| L-CRT1:L-CRT2                | 2.96 | 6  | 0.8139  |
| L-CRT1:L-RT                  | 0.20 | 1  | 0.6512  |
| L-CRT1:S-RT + consolidation  | 2.55 | 2  | 0.2791  |
| L-CRT1:S-RTearly             | 0.23 | 1  | 0.6314  |

Between-designs Q statistic after detaching of single designs

| Detached design                         | Q     | df | p-value |
|-----------------------------------------|-------|----|---------|
| Induction + L-CRT:L-CRT + consolidation | 11.10 | 5  | 0.0493  |
| Induction + L-CRT:L-CRT2                | 12.44 | 5  | 0.0293  |
| L-CRT + consolidation:L-CRT2            | 12.69 | 5  | 0.0264  |
| L-CRT1:CHT                              | 8.38  | 5  | 0.1366  |
| L-CRT1:Induction + L-CRT                | 10.59 | 5  | 0.0601  |
| L-CRT1:L-CRT + consolidation            | 9.80  | 5  | 0.0810  |
| L-CRT1:L-CRT2                           | 8.16  | 5  | 0.1476  |
| L-CRT1:S-RT + consolidation             | 12.72 | 5  | 0.0261  |
| L-CRT2:S-RT + consolidation             | 12.72 | 5  | 0.0261  |
| L-CRT1:CHT:L-CRT2                       | 3.76  | 4  | 0.4393  |

Q statistic to assess consistency under the assumption of a full design-by-treatment interaction random effects model

|                 | Q     | df | p-value | $\tau$ .within | $\tau^2$ .within |
|-----------------|-------|----|---------|----------------|------------------|
| Between designs | 12.72 | 6  | 0.0477  | 0              | 0                |

Consistency: local approach

Separate indirect from direct evidence (SIDE) using back-calculation method

Random effects model:

| comparison                              | k | prop | nma  | direct | indir. | RoR  | z     | p-value |
|-----------------------------------------|---|------|------|--------|--------|------|-------|---------|
| L-CRT1:CHT                              | 2 | 0.92 | 1.68 | 1.45   | 10.20  | 0.14 | -2.44 | 0.0147  |
| CHT:L-CRT2                              | 1 | 0.37 | 0.48 | 0.24   | 0.71   | 0.34 | -2.35 | 0.0188  |
| Induction + L-CRT:L-CRT + consolidation | 1 | 0.67 | 0.80 | 0.68   | 1.12   | 0.61 | -1.09 | 0.2773  |
| L-CRT1:Induction + L-CRT                | 2 | 0.67 | 0.64 | 0.55   | 0.88   | 0.62 | -1.23 | 0.2184  |
| Induction + L-CRT:L-CRT2                | 1 | 0.15 | 1.25 | 1.04   | 1.30   | 0.80 | -0.42 | 0.6778  |
| L-CRT1:L-CRT + consolidation            | 2 | 0.25 | 0.51 | 0.95   | 0.42   | 2.28 | 1.58  | 0.1136  |

|                              |   |      |      |      |      |      |       |        |
|------------------------------|---|------|------|------|------|------|-------|--------|
| L-CRT + consolidation:L-CRT2 | 1 | 0.29 | 1.56 | 1.75 | 1.49 | 1.18 | 0.32  | 0.7492 |
| L-CRT1:L-CRT2                | 8 | 0.89 | 0.80 | 0.81 | 0.70 | 1.16 | 0.59  | 0.5524 |
| L-CRT1:S-RT + consolidation  | 3 | 0.79 | 0.57 | 0.58 | 0.55 | 1.05 | 0.15  | 0.8772 |
| L-CRT2:S-RT + consolidation  | 1 | 0.27 | 0.71 | 0.69 | 0.72 | 0.95 | -0.15 | 0.8772 |

Legend:

comparison - Treatment comparison  
k - Number of studies providing direct evidence  
prop - Direct evidence proportion  
nma - Estimated treatment effect (RR) in network meta-analysis  
direct - Estimated treatment effect (RR) derived from direct evidence  
indir. - Estimated treatment effect (RR) derived from indirect evidence  
RoR - Ratio of Ratios (direct versus indirect)  
z - z-value of test for disagreement (direct versus indirect)  
p-value - p-value of test for disagreement (direct versus indirect)

**Netrank** Higher p-score values indicate higher ranking of treatments

|                       | P-score |
|-----------------------|---------|
| L-CRT + consolidation | 0.9249  |
| S-RT + consolidation  | 0.8614  |
| Induction + L-CRT     | 0.7620  |
| L-CRT2                | 0.5930  |
| L-CRT1                | 0.4290  |
| CHT                   | 0.2803  |
| L-RT                  | 0.1488  |
| S-RTearly             | 0.0007  |

## **Sensitivity 2 - excluding studies with high indirectness**

Number of treatments:

9

Number of studies:

23

Number of individuals included:

10811

Number of individuals randomized to each treatment:

|   | Treatment name        | N. individuals randomized |
|---|-----------------------|---------------------------|
| 1 | CHT                   | 465                       |
| 2 | Induction + L-CRT     | 469                       |
| 3 | L-CRT + consolidation | 288                       |
| 4 | L-CRT1                | 4802                      |
| 5 | L-CRT2                | 3169                      |
| 6 | L-RT                  | 367                       |
| 7 | S-RT + consolidation  | 1021                      |
| 8 | S-RTdelayed           | 75                        |
| 9 | S-RTearly             | 155                       |

### **Pairwise meta-analysis**

Risk ratios above 1 favor the first treatment of the comparison.

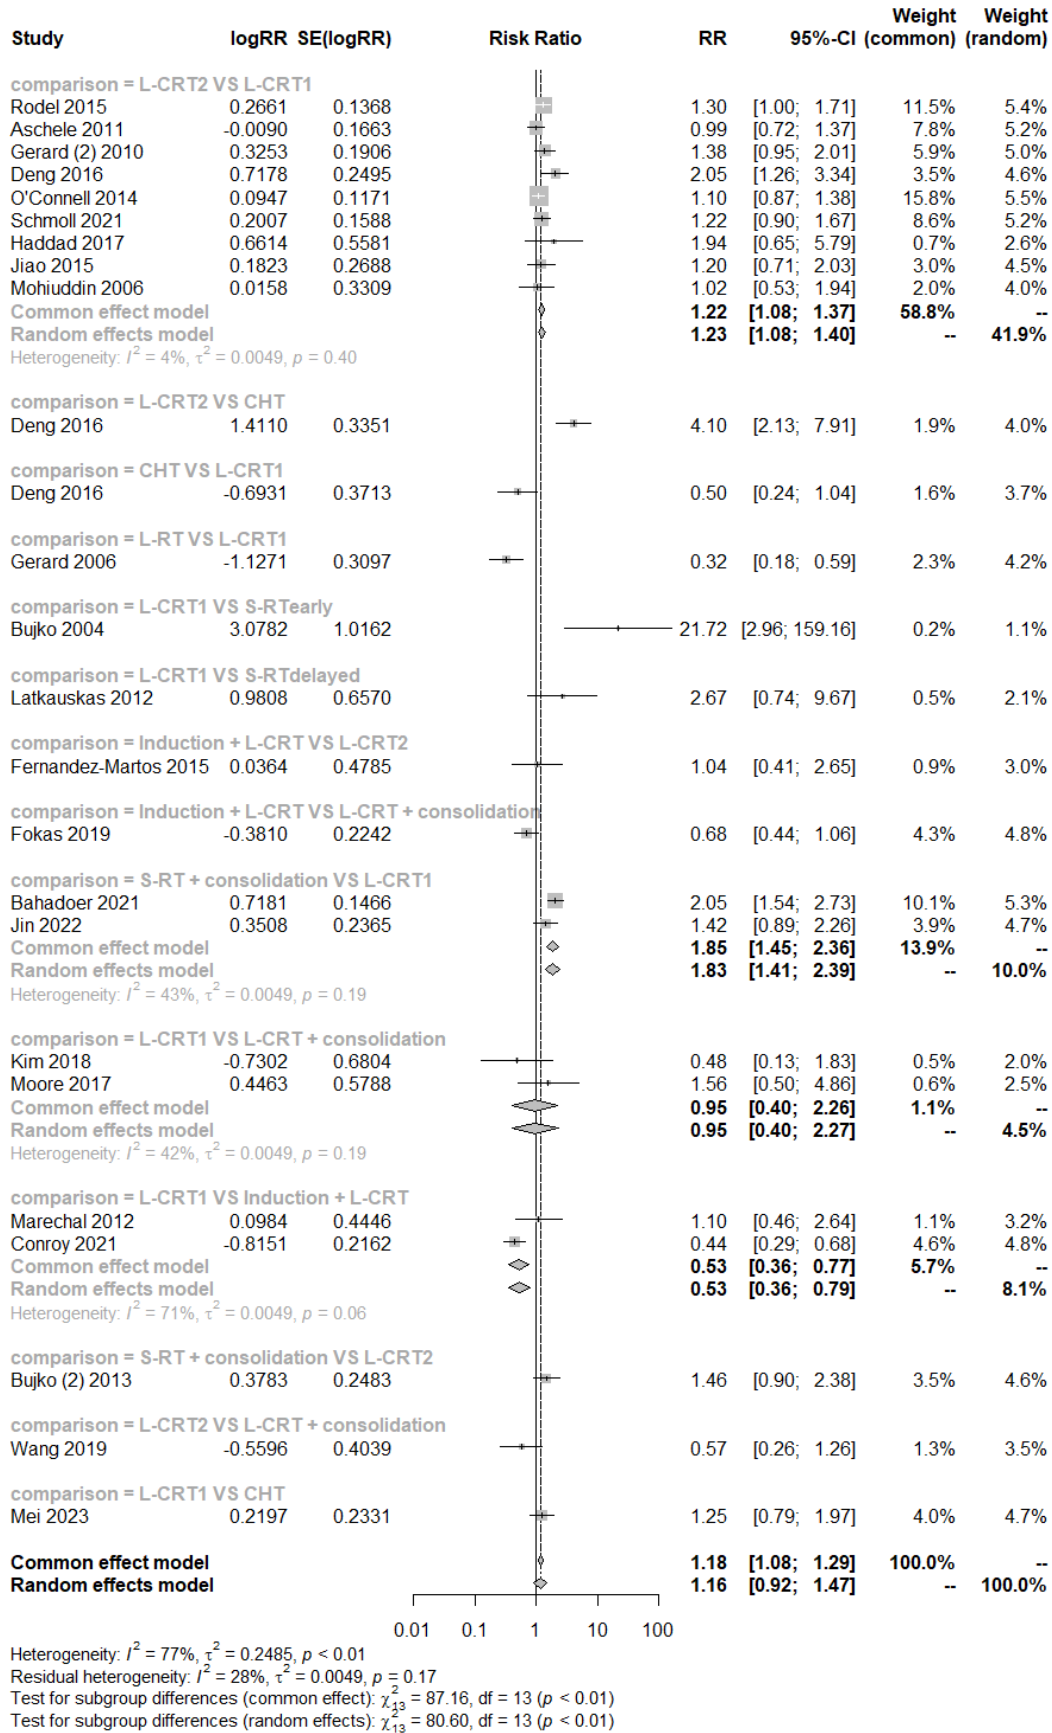



**Network map** The thickness of lines is proportional to the number of studies comparing the two treatments and the size of circles is proportional to the number of individuals for each treatment.

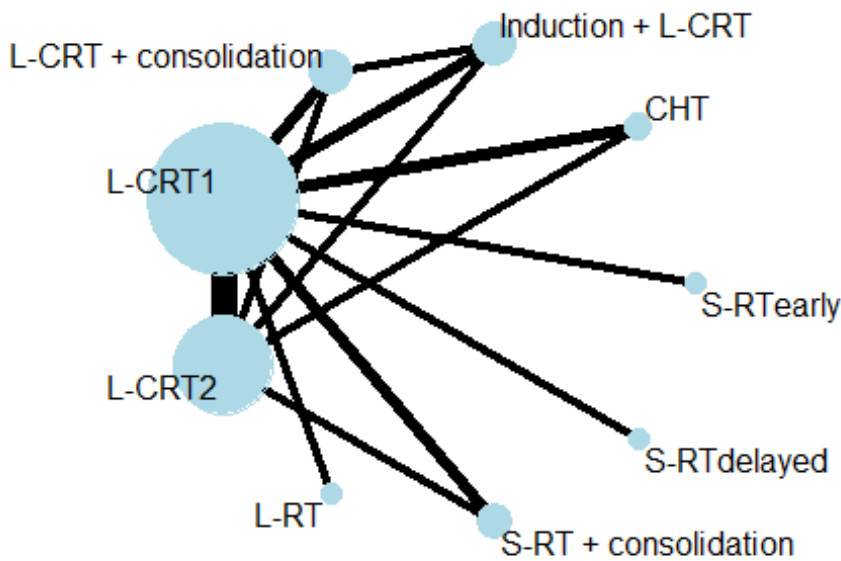

**Netleague table** Relative risks (RRs) and 95% confidence intervals (CIs) are reported. Results of the network meta-analysis are reported in the lower left part of the table and results from the pairwise meta-analysis are reported in the upper right part of the table. RRs higher than 1 favor the column-defining treatment.

|   | V1                     | V2                     | V3                     | V4                     | V5                     | V6                   | V7                     | V8                   | V9                     |
|---|------------------------|------------------------|------------------------|------------------------|------------------------|----------------------|------------------------|----------------------|------------------------|
| 1 | CHT                    | .                      | .                      | 0.69 (0.44 to 1.08)    | 0.24 (0.12 to 0.50)    | .                    | .                      | .                    | .                      |
| 2 | 0.38 (0.22 to 0.67)    | Induction + L-CRT      | 0.68 (0.40 to 1.16)    | 1.82 (1.16 to 2.85)    | 1.04 (0.39 to 2.77)    | .                    | .                      | .                    | .                      |
| 3 | 0.31 (0.16 to 0.57)    | 0.80 (0.52 to 1.24)    | L-CRT + consolidation  | 1.05 (0.43 to 2.57)    | 1.75 (0.75 to 4.07)    | .                    | .                      | .                    | .                      |
| 4 | 0.59 (0.39 to 0.91)    | 1.56 (1.08 to 2.25)    | 1.94 (1.23 to 3.05)    | L-CRT1                 | 0.80 (0.68 to 0.95)    | 3.09 (1.57 to 6.06)  | 0.56 (0.40 to 0.77)    | 2.67 (0.71 to 9.99)  | 21.72 (2.90 to 162.66) |
| 5 | 0.47 (0.30 to 0.73)    | 1.23 (0.84 to 1.81)    | 1.53 (0.96 to 2.43)    | 0.79 (0.68 to 0.92)    | L-CRT2                 | .                    | 0.69 (0.39 to 1.21)    | .                    | .                      |
| 6 | 1.83 (0.82 to 4.08)    | 4.80 (2.23 to 10.36)   | 5.97 (2.65 to 13.49)   | 3.09 (1.57 to 6.06)    | 3.90 (1.95 to 7.80)    | L-RT                 | .                      | .                    | .                      |
| 7 | 0.33 (0.20 to 0.55)    | 0.86 (0.54 to 1.37)    | 1.07 (0.63 to 1.83)    | 0.55 (0.41 to 0.74)    | 0.70 (0.51 to 0.95)    | 0.18 (0.09 to 0.37)  | S-RT + consolidation   | .                    | .                      |
| 8 | 1.58 (0.39 to 6.35)    | 4.15 (1.05 to 16.35)   | 5.16 (1.28 to 20.88)   | 2.67 (0.71 to 9.99)    | 3.37 (0.89 to 12.75)   | 0.86 (0.20 to 3.81)  | 4.82 (1.25 to 18.64)   | S-RTdelayed          | .                      |
| 9 | 12.90 (1.65 to 101.11) | 33.80 (4.37 to 261.71) | 42.04 (5.34 to 331.28) | 21.72 (2.90 to 162.66) | 27.45 (3.64 to 206.81) | 7.04 (0.84 to 58.83) | 39.28 (5.14 to 300.29) | 8.14 (0.73 to 90.52) | S-RTearly              |

**Forest plot** L-CRT-1 was used as a common comparator. RRs above 1 favor the strategy over the common comparator (L-CRT1).

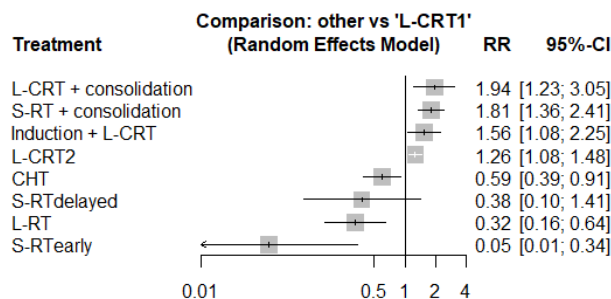

**Assessment of heterogeneity and consistency**

*Global heterogeneity*

We interpreted  $\tau^2$  as follows: heterogeneity low with  $\tau^2 \leq 0.010$ , moderate with  $0.010 < \tau^2 \leq 0.242$ , high with  $\tau^2 > 0.242$ , and  $I^2$  statistics as follows: not important (0%-40%), moderate (30%-60%), substantial (50%-90%), considerable (75%-100%).

$\tau^2 = 0.0227$  ;  $\tau = 0.1505$

$I^2 = 31.12\%$  ( 0 % to 61.64 %)

Consistency: global approach

Q statistic to assess consistency under the assumption of a full design-by-treatment interaction random effects model

Q statistics to assess homogeneity / consistency

|                 | Q     | df | p-value |
|-----------------|-------|----|---------|
| Total           | 23.23 | 16 | 0.1077  |
| Within designs  | 10.65 | 10 | 0.3854  |
| Between designs | 12.58 | 6  | 0.0502  |

Design-specific decomposition of within-designs Q statistic

| Design                       | Q    | df | p-value |
|------------------------------|------|----|---------|
| L-CRT1:Induction + L-CRT     | 3.41 | 1  | 0.0646  |
| L-CRT1:L-CRT + consolidation | 1.73 | 1  | 0.1878  |
| L-CRT1:L-CRT2                | 3.76 | 7  | 0.8073  |
| L-CRT1:S-RT + consolidation  | 1.74 | 1  | 0.1867  |

Between-designs Q statistic after detaching of single designs

| Detached design                         | Q     | df | p-value |
|-----------------------------------------|-------|----|---------|
| Induction + L-CRT:L-CRT + consolidation | 10.98 | 5  | 0.0518  |
| Induction + L-CRT:L-CRT2                | 12.31 | 5  | 0.0308  |
| L-CRT + consolidation:L-CRT2            | 12.55 | 5  | 0.0280  |
| L-CRT1:CHT                              | 8.28  | 5  | 0.1414  |
| L-CRT1:Induction + L-CRT                | 10.48 | 5  | 0.0626  |
| L-CRT1:L-CRT + consolidation            | 9.64  | 5  | 0.0860  |
| L-CRT1:L-CRT2                           | 7.93  | 5  | 0.1604  |
| L-CRT1:S-RT + consolidation             | 12.57 | 5  | 0.0277  |
| L-CRT2:S-RT + consolidation             | 12.57 | 5  | 0.0277  |
| L-CRT1:CHT:L-CRT2                       | 3.78  | 4  | 0.4368  |

Q statistic to assess consistency under the assumption of a full design-by-treatment interaction random effects model

|                 | Q     | df | p-value | $\tau$ .within | $\tau^2$ .within |
|-----------------|-------|----|---------|----------------|------------------|
| Between designs | 12.02 | 6  | 0.0615  | 0.0515         | 0.0027           |

Consistency: local approach

Separate indirect from direct evidence (SIDE) using back-calculation method

Random effects model:

| comparison                              | k | prop | nma  | direct | indir | RoR  | z     | p-value |
|-----------------------------------------|---|------|------|--------|-------|------|-------|---------|
| L-CRT1:CHT                              | 2 | 0.92 | 1.68 | 1.45   | 9.60  | 0.15 | -2.31 | 0.0206  |
| CHT:L-CRT2                              | 1 | 0.38 | 0.47 | 0.24   | 0.70  | 0.35 | -2.27 | 0.0234  |
| Induction + L-CRT:L-CRT + consolidation | 1 | 0.66 | 0.80 | 0.68   | 1.10  | 0.62 | -1.04 | 0.3004  |
| L-CRT1:Induction + L-CRT                | 2 | 0.67 | 0.64 | 0.55   | 0.87  | 0.63 | -1.16 | 0.2468  |
| Induction + L-CRT:L-CRT2                | 1 | 0.15 | 1.23 | 1.04   | 1.27  | 0.82 | -0.37 | 0.7098  |
| L-CRT1:L-CRT + consolidation            | 2 | 0.26 | 0.52 | 0.95   | 0.42  | 2.28 | 1.56  | 0.1190  |
| L-CRT + consolidation:L-CRT2            | 1 | 0.30 | 1.53 | 1.75   | 1.45  | 1.21 | 0.37  | 0.7117  |
| L-CRT1:L-CRT2                           | 9 | 0.89 | 0.79 | 0.80   | 0.69  | 1.16 | 0.58  | 0.5634  |

L-CRT1:S-RT + consolidation 2 0.76 0.55 0.56 0.54 1.03 0.08 0.9353  
 L-CRT2:S-RT + consolidation 1 0.29 0.70 0.69 0.70 0.97 -0.08 0.9353

Legend:  
 comparison - Treatment comparison  
 k - Number of studies providing direct evidence  
 prop - Direct evidence proportion  
 nma - Estimated treatment effect (RR) in network meta-analysis  
 direct - Estimated treatment effect (RR) derived from direct evidence  
 indir. - Estimated treatment effect (RR) derived from indirect evidence  
 RoR - Ratio of Ratios (direct versus indirect)  
 z - z-value of test for disagreement (direct versus indirect)  
 p-value - p-value of test for disagreement (direct versus indirect)

**Netrank** Higher p-score values indicate higher ranking of treatments

|                       | P-score |
|-----------------------|---------|
| L-CRT + consolidation | 0.9237  |
| S-RT + consolidation  | 0.8895  |
| Induction + L-CRT     | 0.7810  |
| L-CRT2                | 0.6439  |
| L-CRT1                | 0.4912  |
| CHT                   | 0.3344  |
| S-RTdelayed           | 0.2429  |
| L-RT                  | 0.1821  |
| S-RTearly             | 0.0113  |

### **Sensitivity 3 - excluding CHT arm**

#### **Characteristics of the network**

Number of treatments:

8

Number of studies:

24

Number of individuals included:

11201

Number of individuals randomized to each treatment:

|   | Treatment name        | N. individuals randomized |
|---|-----------------------|---------------------------|
| 1 | Induction + L-CRT     | 469                       |
| 2 | L-CRT + consolidation | 288                       |
| 3 | L-CRT1                | 5087                      |
| 4 | L-CRT2                | 3004                      |
| 5 | L-RT                  | 872                       |
| 6 | S-RT + consolidation  | 1090                      |
| 7 | S-RTdelayed           | 75                        |
| 8 | S-RTearly             | 316                       |

#### **Pairwise meta-analysis**

Risk ratios above 1 favor the first treatment of the comparison.

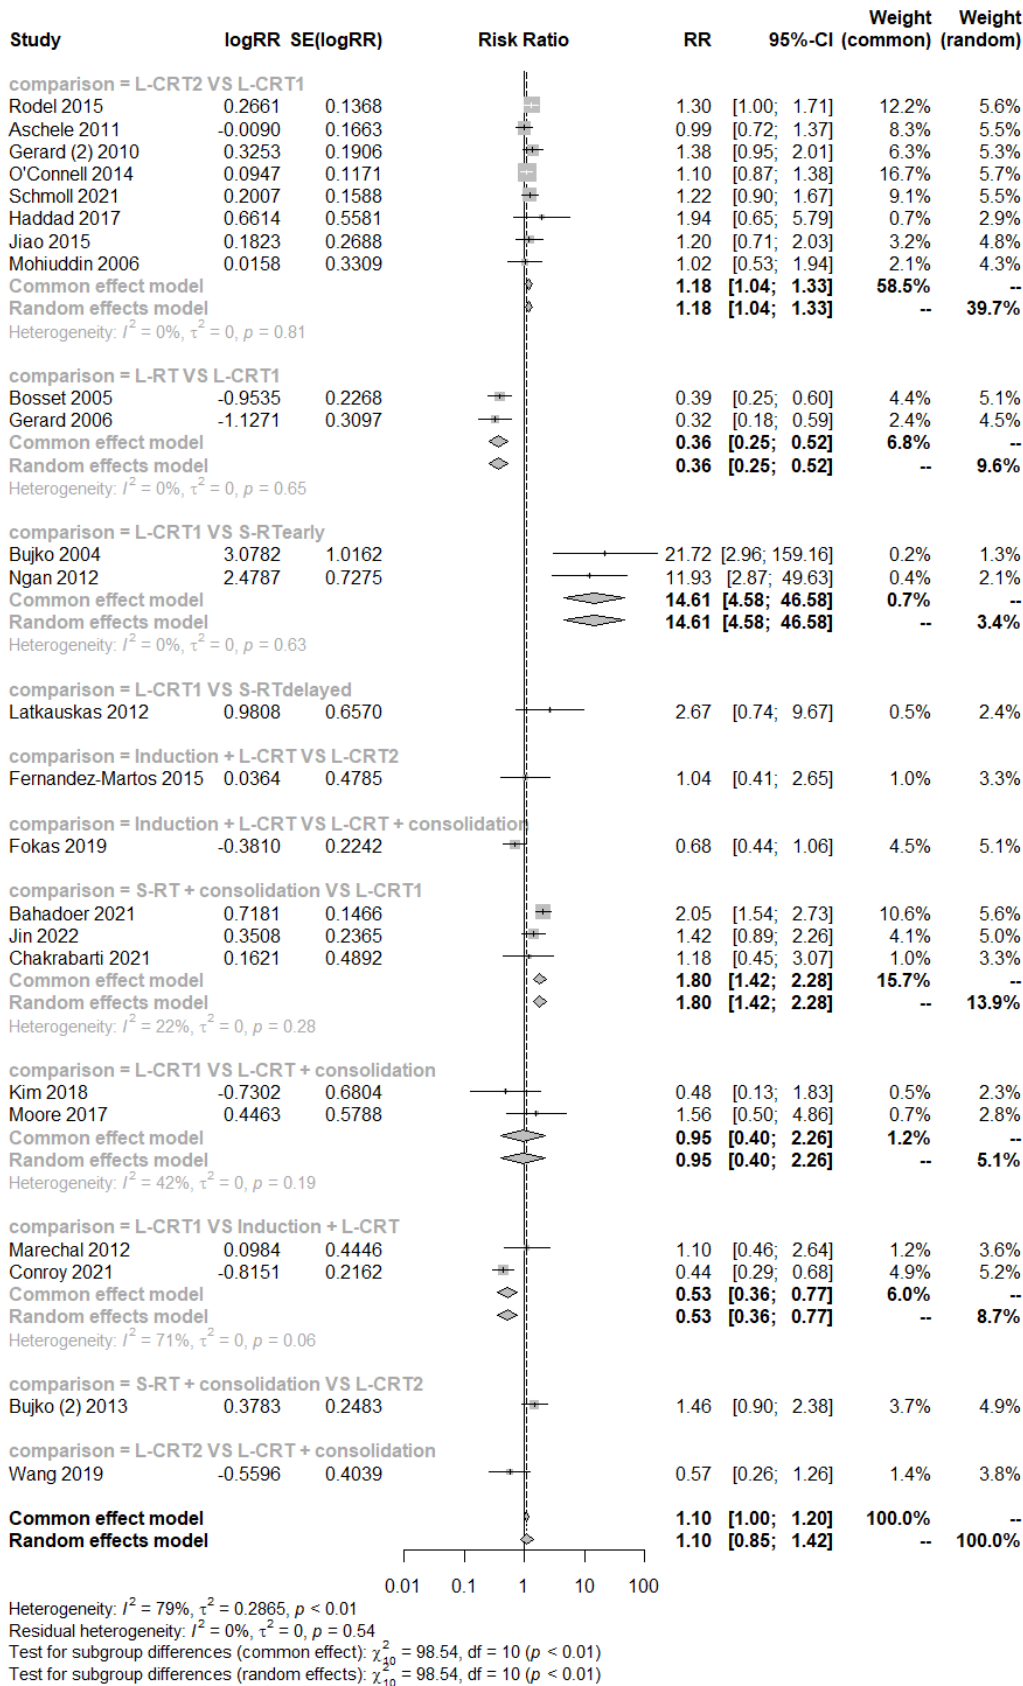

**Network map** The thickness of lines is proportional to the number of studies comparing the two treatments and the size of circles is proportional to the number of individuals for each treatment.

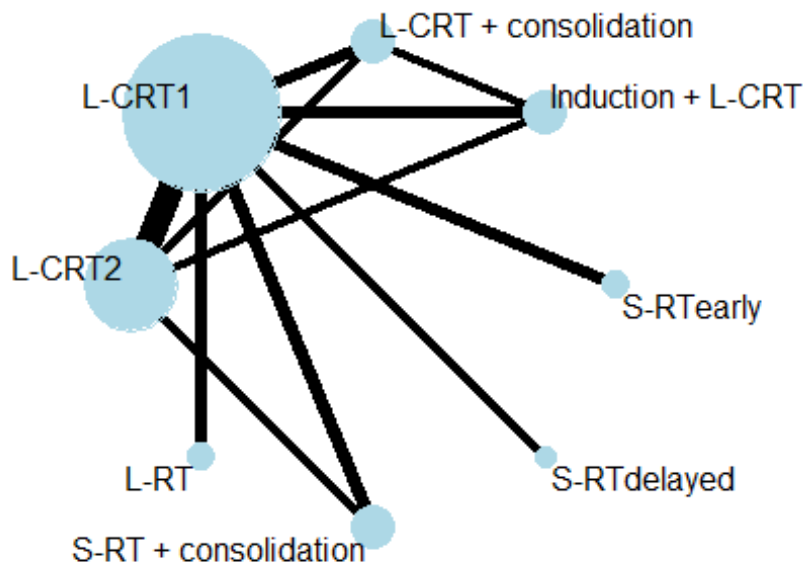

**Netleague table** Relative risks (RRs) and 95% confidence intervals (CIs) are reported. Results of the network meta-analysis are reported in the lower left part of the table and results from the pairwise meta-analysis are reported in the upper right part of the table. RRs higher than 1 favor the column-defining treatment.

|   | V1                    | V2                     | V3                    | V4                    | V5                   | V6                    | V7                   | V8                    |
|---|-----------------------|------------------------|-----------------------|-----------------------|----------------------|-----------------------|----------------------|-----------------------|
| 1 | Induction + L-CRT     | 0.68 (0.44 to 1.06)    | 1.90 (1.30 to 2.78)   | 1.04 (0.41 to 2.65)   | .                    | .                     | .                    | .                     |
| 2 | 0.80 (0.55 to 1.16)   | L-CRT + consolidation  | 1.05 (0.44 to 2.49)   | 1.75 (0.79 to 3.86)   | .                    | .                     | .                    | .                     |
| 3 | 1.61 (1.17 to 2.22)   | 2.01 (1.34 to 3.02)    | L-CRT1                | 0.85 (0.75 to 0.96)   | 2.76 (1.93 to 3.95)  | 0.56 (0.44 to 0.70)   | 2.67 (0.74 to 9.67)  | 14.61 (4.58 to 46.58) |
| 4 | 1.36 (0.97 to 1.89)   | 1.69 (1.12 to 2.56)    | 0.84 (0.75 to 0.95)   | L-CRT2                | .                    | 0.69 (0.42 to 1.11)   | .                    | .                     |
| 5 | 4.44 (2.75 to 7.18)   | 5.55 (3.22 to 9.55)    | 2.76 (1.93 to 3.95)   | 3.27 (2.24 to 4.78)   | L-RT                 | .                     | .                    | .                     |
| 6 | 0.90 (0.61 to 1.32)   | 1.13 (0.71 to 1.78)    | 0.56 (0.45 to 0.69)   | 0.66 (0.53 to 0.84)   | 0.20 (0.13 to 0.31)  | S-RT + consolidation  | .                    | .                     |
| 7 | 4.30 (1.14 to 16.19)  | 5.37 (1.39 to 20.71)   | 2.67 (0.74 to 9.67)   | 3.17 (0.87 to 11.54)  | 0.97 (0.25 to 3.68)  | 4.77 (1.29 to 17.59)  | S-RTdelayed          | .                     |
| 8 | 23.54 (7.07 to 78.35) | 29.40 (8.60 to 100.48) | 14.61 (4.58 to 46.58) | 17.35 (5.41 to 55.65) | 5.30 (1.57 to 17.84) | 26.13 (8.04 to 84.95) | 5.48 (0.97 to 30.99) | S-RTearly             |

**Forest plot** L-CRT-1 was used as a common comparator. RRs above 1 favor the strategy over the common comparator (L-CRT1).

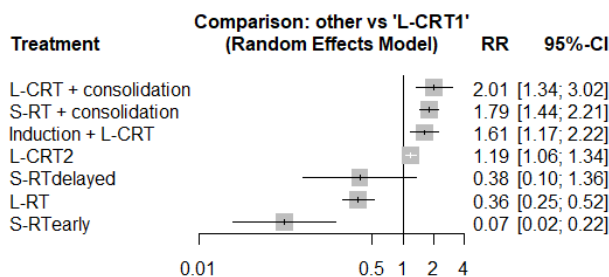

**Assessment of heterogeneity and consistency**

*Global heterogeneity*

We interpreted  $\tau^2$  as follows: heterogeneity low with  $\tau^2 \leq 0.010$ , moderate with  $0.010 < \tau^2 \leq 0.242$ , high with  $\tau^2 > 0.242$ , and  $I^2$  statistics as follows: not important (0%-40%), moderate (30%-60%), substantial (50%-90%), considerable (75%-100%).

$\tau^2 = 0$  ;  $\tau = 0$

$I^2 = 0\%$  ( 0 % to 49.97 %)

Consistency: global approach

Q statistic to assess consistency under the assumption of a full design-by-treatment interaction random effects model

Q statistics to assess homogeneity / consistency

|                 | Q     | df | p-value |
|-----------------|-------|----|---------|
| Total           | 15.64 | 17 | 0.5498  |
| Within designs  | 11.89 | 13 | 0.5364  |
| Between designs | 3.74  | 4  | 0.4421  |

Design-specific decomposition of within-designs Q statistic

| Design                       | Q    | df | p-value |
|------------------------------|------|----|---------|
| L-CRT1:Induction + L-CRT     | 3.41 | 1  | 0.0646  |
| L-CRT1:L-CRT + consolidation | 1.73 | 1  | 0.1878  |
| L-CRT1:L-CRT2                | 3.76 | 7  | 0.8073  |
| L-CRT1:L-RT                  | 0.20 | 1  | 0.6512  |
| L-CRT1:S-RT + consolidation  | 2.55 | 2  | 0.2791  |
| L-CRT1:S-RTearly             | 0.23 | 1  | 0.6314  |

Between-designs Q statistic after detaching of single designs

| Detached design                         | Q    | df | p-value |
|-----------------------------------------|------|----|---------|
| Induction + L-CRT:L-CRT + consolidation | 2.03 | 3  | 0.5661  |
| Induction + L-CRT:L-CRT2                | 3.38 | 3  | 0.3364  |
| L-CRT + consolidation:L-CRT2            | 3.73 | 3  | 0.2918  |
| L-CRT1:Induction + L-CRT                | 1.38 | 3  | 0.7104  |
| L-CRT1:L-CRT + consolidation            | 0.93 | 3  | 0.8174  |
| L-CRT1:L-CRT2                           | 3.63 | 3  | 0.3046  |
| L-CRT1:S-RT + consolidation             | 3.72 | 3  | 0.2931  |
| L-CRT2:S-RT + consolidation             | 3.72 | 3  | 0.2931  |

Q statistic to assess consistency under the assumption of a full design-by-treatment interaction random effects model

|                 | Q    | df | p-value | $\tau$ .within | $\tau^2$ .within |
|-----------------|------|----|---------|----------------|------------------|
| Between designs | 3.74 | 4  | 0.4421  | 0              | 0                |

Consistency: local approach

Separate indirect from direct evidence (SIDE) using back-calculation method

Random effects model:

| comparison                              | k | prop | nma  | direct | indir | RoR  | z     | p-value |
|-----------------------------------------|---|------|------|--------|-------|------|-------|---------|
| Induction + L-CRT:L-CRT + consolidation | 1 | 0.71 | 0.80 | 0.68   | 1.18  | 0.58 | -1.31 | 0.1908  |
| L-CRT1:Induction + L-CRT                | 2 | 0.70 | 0.62 | 0.53   | 0.91  | 0.58 | -1.54 | 0.1243  |
| Induction + L-CRT:L-CRT2                | 1 | 0.12 | 1.36 | 1.04   | 1.41  | 0.74 | -0.60 | 0.5485  |
| L-CRT1:L-CRT + consolidation            | 2 | 0.22 | 0.50 | 0.95   | 0.41  | 2.31 | 1.68  | 0.0938  |
| L-CRT + consolidation:L-CRT2            | 1 | 0.27 | 1.69 | 1.75   | 1.67  | 1.05 | 0.09  | 0.9254  |
| L-CRT1:L-CRT2                           | 8 | 0.93 | 0.84 | 0.85   | 0.78  | 1.08 | 0.34  | 0.7350  |
| L-CRT1:S-RT + consolidation             | 3 | 0.82 | 0.56 | 0.56   | 0.58  | 0.96 | -0.14 | 0.8869  |
| L-CRT2:S-RT + consolidation             | 1 | 0.23 | 0.66 | 0.69   | 0.66  | 1.04 | 0.14  | 0.8869  |

Legend:

- comparison - Treatment comparison
- k - Number of studies providing direct evidence
- prop - Direct evidence proportion
- nma - Estimated treatment effect (RR) in network meta-analysis
- direct - Estimated treatment effect (RR) derived from direct evidence
- indir. - Estimated treatment effect (RR) derived from indirect evidence
- RoR - Ratio of Ratios (direct versus indirect)
- z - z-value of test for disagreement (direct versus indirect)
- p-value - p-value of test for disagreement (direct versus indirect)

**Netrank** Higher p-score values indicate higher ranking of treatments

|                       | P-score |
|-----------------------|---------|
| L-CRT + consolidation | 0.9372  |
| S-RT + consolidation  | 0.8572  |
| Induction + L-CRT     | 0.7661  |
| L-CRT2                | 0.5714  |
| L-CRT1                | 0.4195  |
| S-RTdelayed           | 0.2333  |
| L-RT                  | 0.2110  |
| S-RTearly             | 0.0044  |



## Sensitivity 4 - PCR on the Per Protocol Populations

### Characteristics of the network

Number of treatments:

9

Number of studies:

27

Number of individuals included:

12558

Number of individuals randomized to each treatment:

|   | Treatment name        | N. individuals randomized |
|---|-----------------------|---------------------------|
| 1 | CHT                   | 959                       |
| 2 | Induction + L-CRT     | 437                       |
| 3 | L-CRT + consolidation | 269                       |
| 4 | L-CRT1                | 5707                      |
| 5 | L-CRT2                | 3009                      |
| 6 | L-RT                  | 836                       |
| 7 | S-RT + consolidation  | 965                       |
| 8 | S-RTdelayed           | 68                        |
| 9 | S-RTearly             | 308                       |

### Pairwise meta-analysis

Risk ratios above 1 favor the first treatment of the comparison.

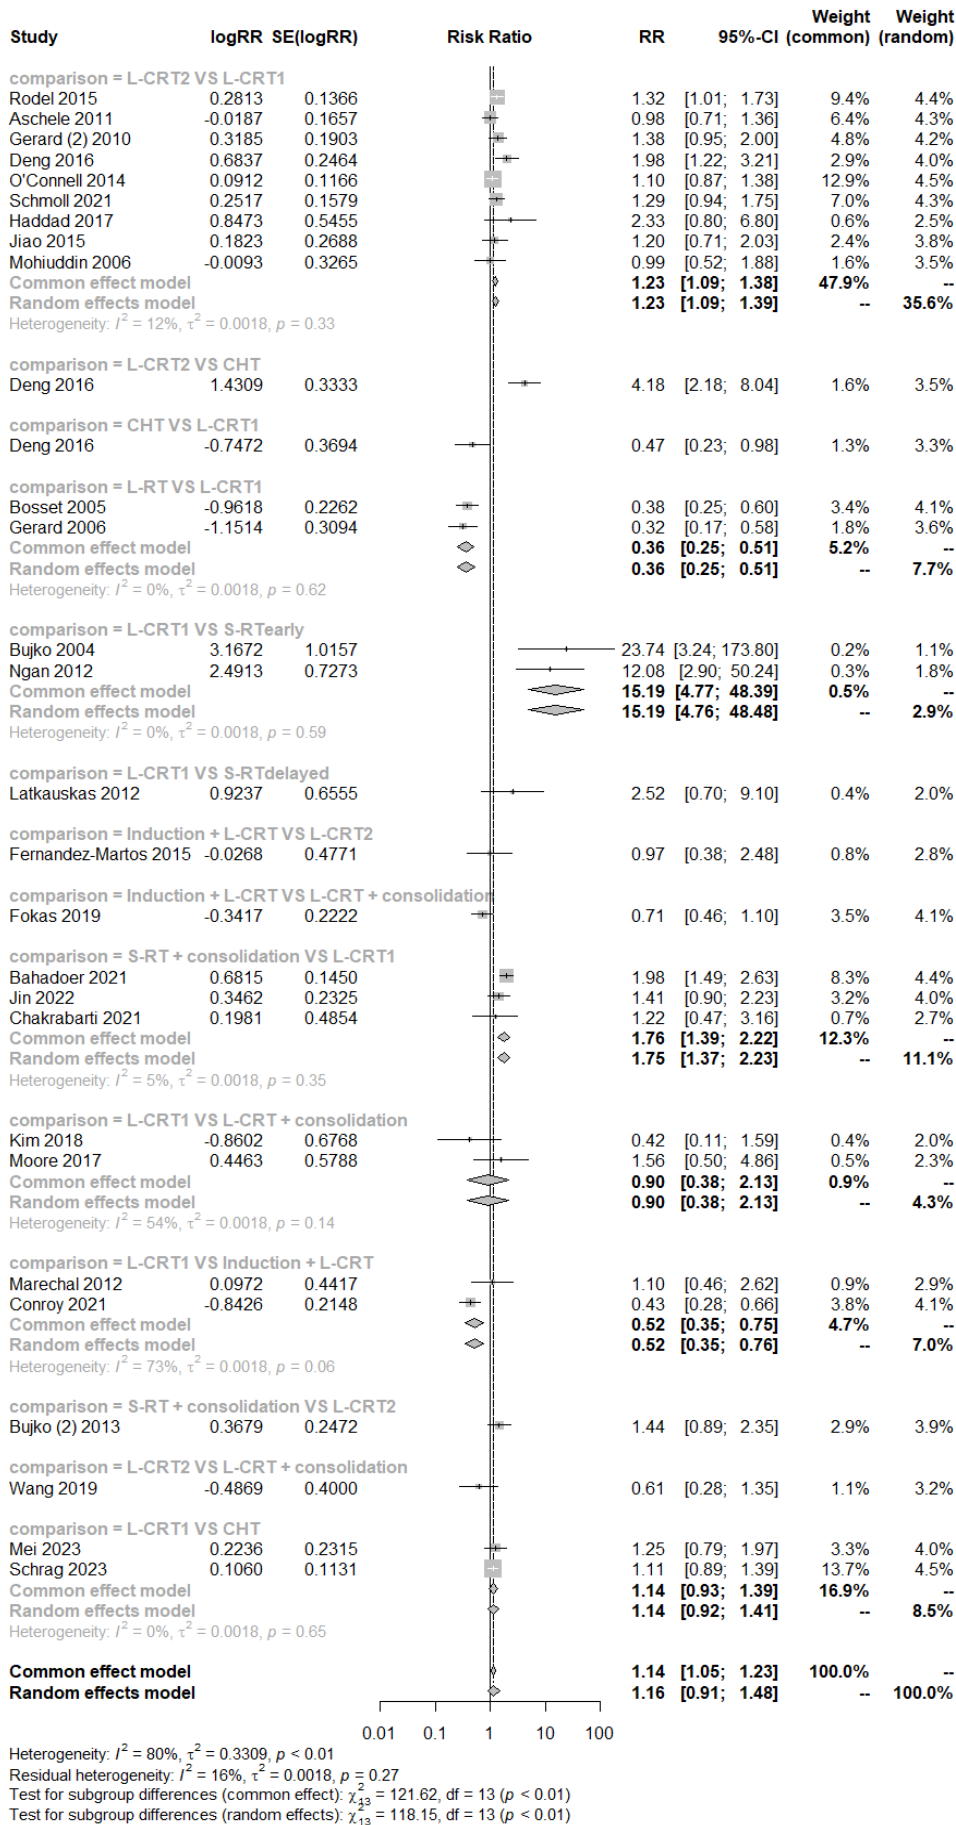

**Network map** The thickness of lines is proportional to the number of studies comparing the two treatments and the size of circles is proportional to the number of individuals for each treatment.

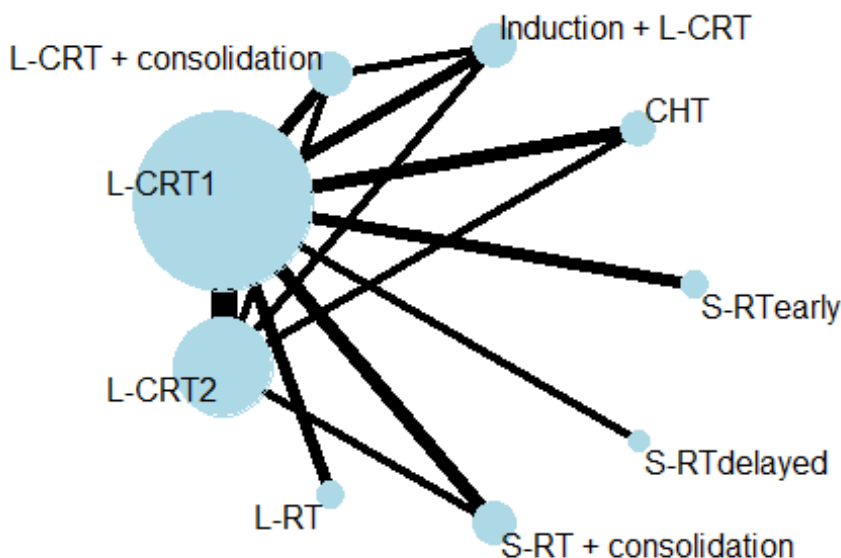

**Netleague table** Relative risks (RRs) and 95% confidence intervals (CIs) are reported. Results of the network meta-analysis are reported in the lower left part of the table and results from the pairwise meta-analysis are reported in the upper right part of the table. RRs higher than 1 favor the column-defining treatment.

|   | V1                    | V2                    | V3                     | V4                    | V5                    | V6                   | V7                    | V8                   | V9                    |
|---|-----------------------|-----------------------|------------------------|-----------------------|-----------------------|----------------------|-----------------------|----------------------|-----------------------|
| 1 | CHT                   | .                     | .                      | 0.80 (0.60 to 1.06)   | 0.24 (0.12 to 0.49)   | .                    | .                     | .                    | .                     |
| 2 | 0.47 (0.30 to 0.75)   | Induction + L-CRT     | 0.71 (0.42 to 1.21)    | 1.85 (1.18 to 2.90)   | 0.97 (0.36 to 2.60)   | .                    | .                     | .                    | .                     |
| 3 | 0.39 (0.23 to 0.67)   | 0.83 (0.54 to 1.27)   | L-CRT + consolidation  | 1.12 (0.46 to 2.72)   | 1.63 (0.70 to 3.77)   | .                    | .                     | .                    | .                     |
| 4 | 0.75 (0.56 to 0.99)   | 1.58 (1.09 to 2.28)   | 1.91 (1.21 to 3.00)    | L-CRT1                | 0.80 (0.68 to 0.94)   | 2.81 (1.85 to 4.29)  | 0.59 (0.43 to 0.81)   | 2.52 (0.67 to 9.43)  | 15.23 (4.68 to 49.60) |
| 5 | 0.58 (0.42 to 0.80)   | 1.23 (0.84 to 1.80)   | 1.48 (0.93 to 2.35)    | 0.78 (0.67 to 0.91)   | L-CRT2                | .                    | 0.69 (0.39 to 1.22)   | .                    | .                     |
| 6 | 2.10 (1.27 to 3.49)   | 4.44 (2.54 to 7.76)   | 5.36 (2.89 to 9.97)    | 2.81 (1.85 to 4.29)   | 3.62 (2.31 to 5.66)   | L-RT                 | .                     | .                    | .                     |
| 7 | 0.43 (0.29 to 0.64)   | 0.91 (0.58 to 1.44)   | 1.10 (0.65 to 1.87)    | 0.58 (0.44 to 0.76)   | 0.74 (0.55 to 1.01)   | 0.21 (0.12 to 0.34)  | S-RT + consolidation  | .                    | .                     |
| 8 | 1.88 (0.49 to 7.26)   | 3.97 (1.01 to 15.64)  | 4.80 (1.19 to 19.39)   | 2.52 (0.67 to 9.43)   | 3.24 (0.86 to 12.23)  | 0.89 (0.22 to 3.58)  | 4.35 (1.13 to 16.74)  | S-RTdelayed          | .                     |
| 9 | 11.39 (3.38 to 38.34) | 24.03 (6.98 to 82.74) | 29.03 (8.19 to 102.87) | 15.23 (4.68 to 49.60) | 19.58 (5.95 to 64.40) | 5.41 (1.55 to 18.95) | 26.29 (7.82 to 88.38) | 6.05 (1.03 to 35.54) | S-RTearly             |

**Forest plot** L-CRT-1 was used as a common comparator. RRs above 1 favor the strategy over the common comparator (L-CRT1).

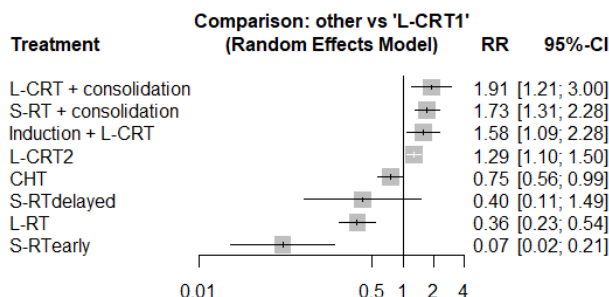

**Assessment of heterogeneity and consistency**

*Global heterogeneity*

We interpreted  $\tau^2$  as follows: heterogeneity low with  $\tau^2 \leq 0.010$ , moderate with  $0.010 < \tau^2 \leq 0.242$ , high with  $\tau^2 > 0.242$ , and  $I^2$  statistics as follows: not important (0%-40%), moderate (30%-60%), substantial (50%-90%), considerable (75%-100%).

##  $\tau^2 = 0.0237$  ;  $\tau = 0.154$   
 ##  $I^2 = 30.79\%$  ( 0 % to 59.32 %)

Consistency: global approach

Q statistic to assess consistency under the assumption of a full design-by-treatment interaction random effects model

Q statistics to assess homogeneity / consistency

|                 | Q     | df | p-value |
|-----------------|-------|----|---------|
| Total           | 28.90 | 20 | 0.0898  |
| Within designs  | 13.79 | 14 | 0.4653  |
| Between designs | 15.10 | 6  | 0.0195  |

Design-specific decomposition of within-designs Q statistic

| Design                       | Q    | df | p-value |
|------------------------------|------|----|---------|
| L-CRT1:CHT                   | 0.21 | 1  | 0.6480  |
| L-CRT1:Induction + L-CRT     | 3.66 | 1  | 0.0557  |
| L-CRT1:L-CRT + consolidation | 2.15 | 1  | 0.1424  |
| L-CRT1:L-CRT2                | 5.13 | 7  | 0.6440  |
| L-CRT1:L-RT                  | 0.24 | 1  | 0.6209  |
| L-CRT1:S-RT + consolidation  | 2.10 | 2  | 0.3496  |
| L-CRT1:S-RTearly             | 0.29 | 1  | 0.5884  |

Between-designs Q statistic after detaching of single designs

| Detached design                         | Q     | df | p-value |
|-----------------------------------------|-------|----|---------|
| Induction + L-CRT:L-CRT + consolidation | 13.62 | 5  | 0.0182  |
| Induction + L-CRT:L-CRT2                | 14.65 | 5  | 0.0120  |
| L-CRT + consolidation:L-CRT2            | 15.10 | 5  | 0.0099  |
| L-CRT1:CHT                              | 7.39  | 5  | 0.1934  |
| L-CRT1:Induction + L-CRT                | 12.83 | 5  | 0.0251  |
| L-CRT1:L-CRT + consolidation            | 12.77 | 5  | 0.0256  |
| L-CRT1:L-CRT2                           | 9.66  | 5  | 0.0855  |
| L-CRT1:S-RT + consolidation             | 15.09 | 5  | 0.0100  |
| L-CRT2:S-RT + consolidation             | 15.09 | 5  | 0.0100  |
| L-CRT1:CHT:L-CRT2                       | 3.48  | 4  | 0.4810  |

Q statistic to assess consistency under the assumption of a full design-by-treatment interaction random effects model

|                 | Q     | df | p-value | tau.within | tau2.within |
|-----------------|-------|----|---------|------------|-------------|
| Between designs | 15.10 | 6  | 0.0195  | 0          | 0           |

Consistency: local approach

Separate indirect from direct evidence (SIDE) using back-calculation method  
 Random effects model:

| comparison                              | k | prop | nma  | direct | indir. | RoR  | z     | p-value |
|-----------------------------------------|---|------|------|--------|--------|------|-------|---------|
| L-CRT1:CHT                              | 3 | 0.97 | 1.34 | 1.25   | 8.95   | 0.14 | -2.46 | 0.0139  |
| CHT:L-CRT2                              | 1 | 0.19 | 0.58 | 0.24   | 0.72   | 0.33 | -2.69 | 0.0071  |
| Induction + L-CRT:L-CRT + consolidation | 1 | 0.66 | 0.83 | 0.71   | 1.11   | 0.64 | -0.97 | 0.3331  |
| L-CRT1:Induction + L-CRT                | 2 | 0.66 | 0.63 | 0.54   | 0.87   | 0.62 | -1.20 | 0.2317  |
| Induction + L-CRT:L-CRT2                | 1 | 0.15 | 1.23 | 0.97   | 1.28   | 0.76 | -0.50 | 0.6155  |
| L-CRT1:L-CRT + consolidation            | 2 | 0.26 | 0.52 | 0.89   | 0.43   | 2.06 | 1.37  | 0.1708  |

|                              |   |      |      |      |      |      |       |        |
|------------------------------|---|------|------|------|------|------|-------|--------|
| L-CRT + consolidation:L-CRT2 | 1 | 0.30 | 1.48 | 1.63 | 1.42 | 1.14 | 0.26  | 0.7954 |
| L-CRT1:L-CRT2                | 9 | 0.88 | 0.78 | 0.80 | 0.65 | 1.23 | 0.85  | 0.3973 |
| L-CRT1:S-RT + consolidation  | 3 | 0.78 | 0.58 | 0.59 | 0.54 | 1.11 | 0.30  | 0.7677 |
| L-CRT2:S-RT + consolidation  | 1 | 0.28 | 0.74 | 0.69 | 0.77 | 0.90 | -0.30 | 0.7677 |

Legend:

- comparison - Treatment comparison
- k - Number of studies providing direct evidence
- prop - Direct evidence proportion
- nma - Estimated treatment effect (RR) in network meta-analysis
- direct - Estimated treatment effect (RR) derived from direct evidence
- indir. - Estimated treatment effect (RR) derived from indirect evidence
- RoR - Ratio of Ratios (direct versus indirect)
- z - z-value of test for disagreement (direct versus indirect)
- p-value - p-value of test for disagreement (direct versus indirect)

**Netrank** Higher p-score values indicate higher ranking of treatments

|                       | P-score |
|-----------------------|---------|
| L-CRT + consolidation | 0.9231  |
| S-RT + consolidation  | 0.8703  |
| Induction + L-CRT     | 0.7956  |
| L-CRT2                | 0.6474  |
| L-CRT1                | 0.4880  |
| CHT                   | 0.3553  |
| S-RTdelayed           | 0.2374  |
| L-RT                  | 0.1794  |

## eAppendix 7. Tolerability of treatment

### Characteristics of the network

Number of treatments:

8

Number of studies:

25

Number of individuals included:

11987

Number of individuals randomized to each treatment:

|   | Treatment name        | N. individuals randomized |
|---|-----------------------|---------------------------|
| 1 | CHT                   | 1050                      |
| 2 | Induction + L-CRT     | 469                       |
| 3 | L-CRT + consolidation | 288                       |
| 4 | L-CRT1                | 5373                      |
| 5 | L-CRT2                | 2529                      |
| 6 | L-RT                  | 872                       |
| 7 | S-RT + consolidation  | 1090                      |
| 8 | S-RTearly             | 316                       |

### Pairwise meta-analysis

Risk ratios above 1 favor the first treatment of the comparison.

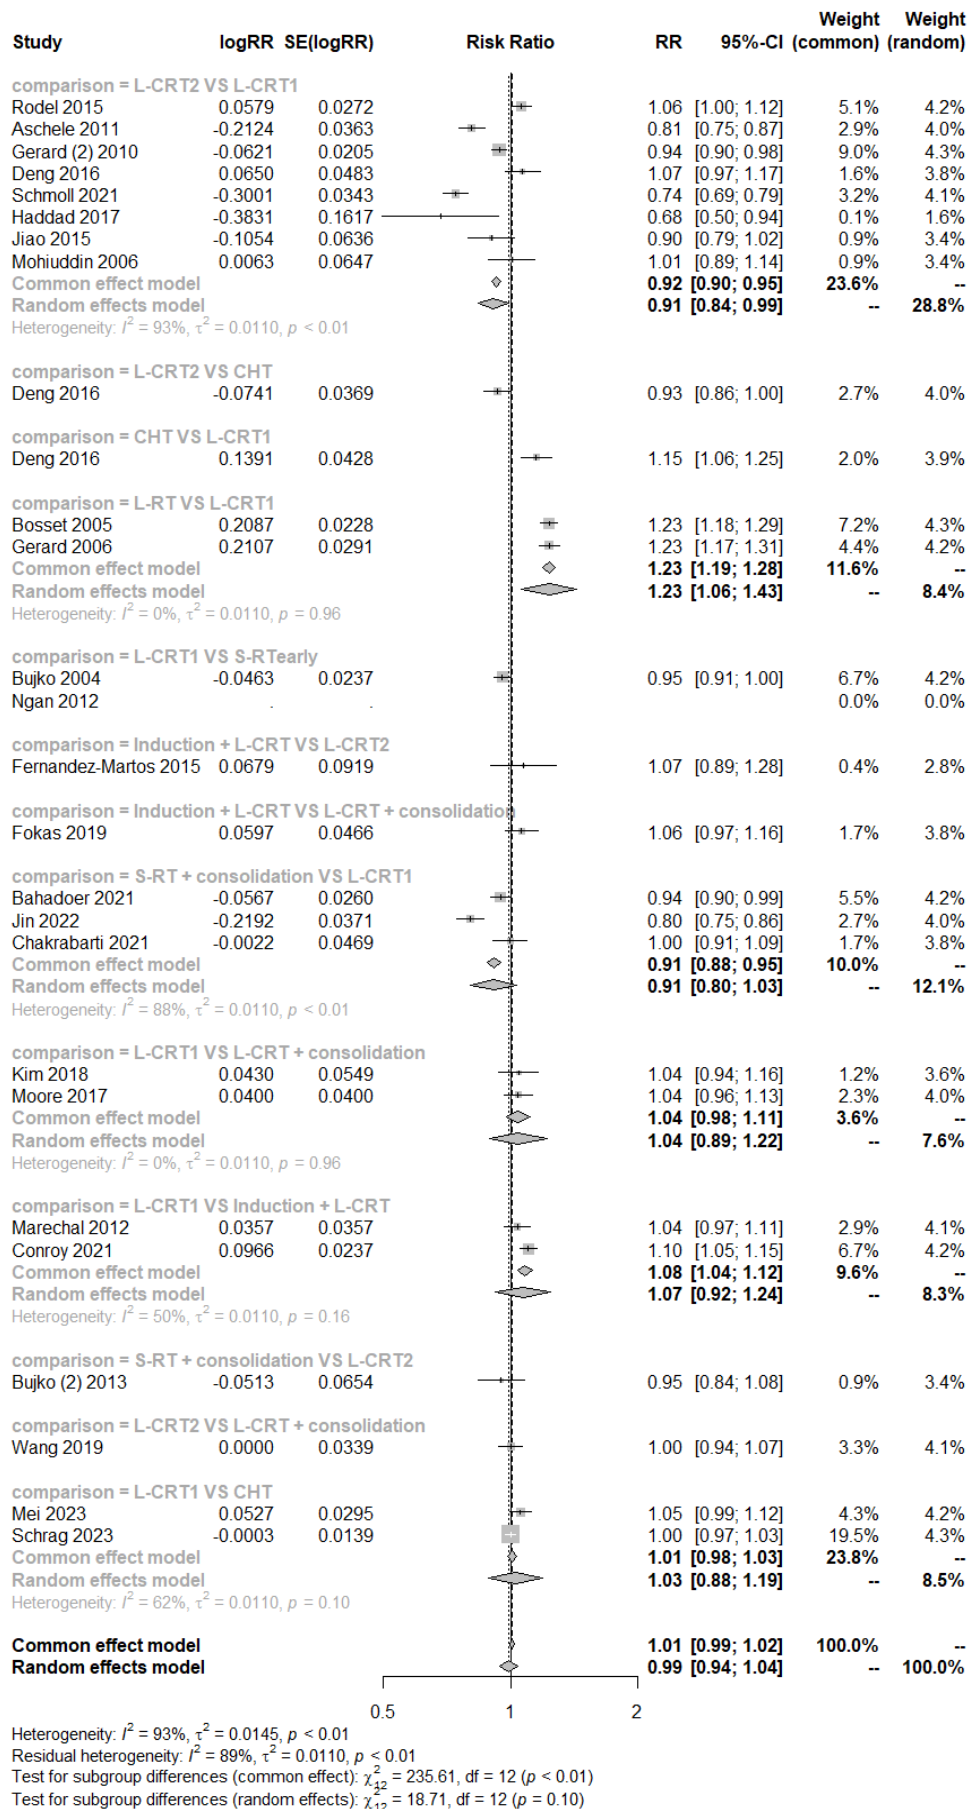

**Network map** The thickness of lines is proportional to the number of studies comparing the two treatments and the size of circles is proportional to the number of individuals for each treatment.

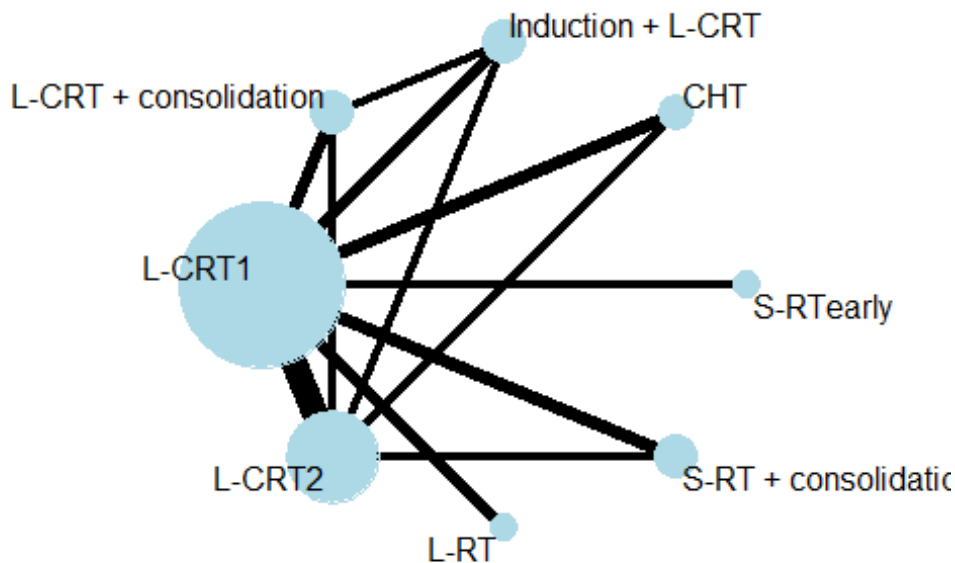

**Netleague table** Relative risks (RRs) and 95% confidence intervals (CIs) are reported. Results of the network meta-analysis are reported in the lower left part of the table and results from the pairwise meta-analysis are reported in the upper right part of the table. RRs higher than 1 favor the column-defining treatment.

|   | V1                  | V2                  | V3                    | V4                  | V5                  | V6                  | V7                   | V8                  |
|---|---------------------|---------------------|-----------------------|---------------------|---------------------|---------------------|----------------------|---------------------|
| 1 | CHT                 | .                   | .                     | 1.02 (0.92 to 1.14) | 1.08 (0.90 to 1.29) | .                   | .                    | .                   |
| 2 | 1.05 (0.92 to 1.21) | Induction + L-CRT   | 1.06 (0.88 to 1.28)   | 0.93 (0.82 to 1.06) | 1.07 (0.84 to 1.37) | .                   | .                    | .                   |
| 3 | 1.08 (0.94 to 1.24) | 1.02 (0.91 to 1.16) | L-CRT + consolidation | 0.96 (0.84 to 1.10) | 1.00 (0.83 to 1.20) | .                   | .                    | .                   |
| 4 | 1.01 (0.91 to 1.11) | 0.95 (0.86 to 1.06) | 0.93 (0.84 to 1.03)   | L-CRT1              | 1.10 (1.02 to 1.18) | 0.81 (0.72 to 0.92) | 1.10 (0.99 to 1.22)  | 0.95 (0.80 to 1.14) |
| 5 | 1.10 (0.99 to 1.23) | 1.05 (0.94 to 1.17) | 1.02 (0.92 to 1.14)   | 1.10 (1.03 to 1.17) | L-CRT2              | .                   | 1.05 (0.85 to 1.30)  | .                   |
| 6 | 0.82 (0.70 to 0.95) | 0.77 (0.66 to 0.91) | 0.76 (0.64 to 0.89)   | 0.81 (0.72 to 0.92) | 0.74 (0.64 to 0.85) | L-RT                | .                    | .                   |
| 7 | 1.12 (0.97 to 1.28) | 1.06 (0.92 to 1.22) | 1.03 (0.90 to 1.18)   | 1.11 (1.01 to 1.22) | 1.01 (0.91 to 1.13) | 1.37 (1.17 to 1.60) | S-RT + consolidation | .                   |
| 8 | 0.96 (0.79 to 1.17) | 0.91 (0.75 to 1.11) | 0.89 (0.73 to 1.09)   | 0.95 (0.80 to 1.14) | 0.87 (0.72 to 1.05) | 1.18 (0.95 to 1.46) | 0.86 (0.71 to 1.05)  | S-RTearly           |

**Forest plot** L-CRT-1 was used as a common comparator. RRs above 1 favor the strategy over the common comparator (L-CRT1).

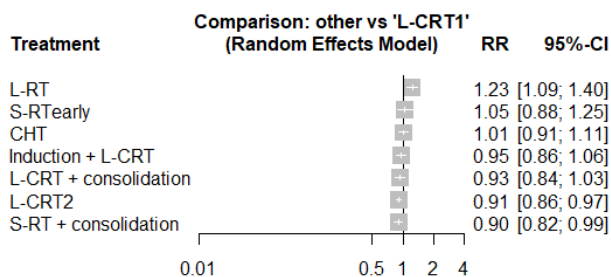

**Assessment of heterogeneity and consistency**

*Global heterogeneity*



We interpreted  $\tau^2$  as follows: heterogeneity low with  $\tau^2 \leq 0.010$ , moderate with  $0.010 < \tau^2 \leq 0.242$ , high with  $\tau^2 > 0.242$ , and  $I^2$  statistics as follows: not important (0%-40%), moderate (30%-60%), substantial (50%-90%), considerable (75%-100%).

$\tau^2 = 0.0073$  ;  $\tau = 0.0856$

$I^2 = 85.47\%$  ( 78.66 % to 90.11 %)

Consistency: global approach

Q statistic to assess consistency under the assumption of a full design-by-treatment interaction random effects model

Q statistics to assess homogeneity / consistency

|                 | Q      | df | p-value  |
|-----------------|--------|----|----------|
| Total           | 123.92 | 18 | < 0.0001 |
| Within designs  | 107.82 | 12 | < 0.0001 |
| Between designs | 16.11  | 6  | 0.0132   |

Design-specific decomposition of within-designs Q statistic

| Design                       | Q     | df | p-value  |
|------------------------------|-------|----|----------|
| L-CRT1:CHT                   | 2.64  | 1  | 0.1040   |
| L-CRT1:Induction + L-CRT     | 2.02  | 1  | 0.1555   |
| L-CRT1:L-CRT + consolidation | 0.00  | 1  | 0.9648   |
| L-CRT1:L-CRT2                | 85.91 | 6  | < 0.0001 |
| L-CRT1:L-RT                  | 0.00  | 1  | 0.9569   |
| L-CRT1:S-RT + consolidation  | 17.25 | 2  | 0.0002   |

Between-designs Q statistic after detaching of single designs

| Detached design                         | Q     | df | p-value |
|-----------------------------------------|-------|----|---------|
| Induction + L-CRT:L-CRT + consolidation | 14.30 | 5  | 0.0138  |
| Induction + L-CRT:L-CRT2                | 15.77 | 5  | 0.0075  |
| L-CRT + consolidation:L-CRT2            | 16.00 | 5  | 0.0069  |
| L-CRT1:CHT                              | 12.84 | 5  | 0.0249  |
| L-CRT1:Induction + L-CRT                | 13.83 | 5  | 0.0167  |
| L-CRT1:L-CRT + consolidation            | 14.23 | 5  | 0.0142  |
| L-CRT1:L-CRT2                           | 14.70 | 5  | 0.0117  |
| L-CRT1:S-RT + consolidation             | 15.72 | 5  | 0.0077  |
| L-CRT2:S-RT + consolidation             | 15.72 | 5  | 0.0077  |
| L-CRT1:CHT:L-CRT2                       | 3.54  | 4  | 0.4717  |

Q statistic to assess consistency under the assumption of a full design-by-treatment interaction random effects model

|                 | Q    | df | p-value | $\tau$ .within | $\tau^2$ .within |
|-----------------|------|----|---------|----------------|------------------|
| Between designs | 3.73 | 6  | 0.7133  | 0.0943         | 0.0089           |

Consistency: local approach

Separate indirect from direct evidence (SIDE) using back-calculation method

Random effects model:

| comparison                              | k | prop | nma  | direct | indir. | RoR  | z     | p-value |
|-----------------------------------------|---|------|------|--------|--------|------|-------|---------|
| L-CRT1:CHT                              | 3 | 0.90 | 0.99 | 0.98   | 1.19   | 0.82 | -1.15 | 0.2506  |
| CHT:L-CRT2                              | 1 | 0.35 | 1.10 | 1.08   | 1.12   | 0.96 | -0.32 | 0.7468  |
| Induction + L-CRT:L-CRT + consolidation | 1 | 0.40 | 1.02 | 1.06   | 1.00   | 1.06 | 0.46  | 0.6419  |
| L-CRT1:Induction + L-CRT                | 2 | 0.64 | 1.05 | 1.07   | 1.01   | 1.06 | 0.55  | 0.5857  |
| Induction + L-CRT:L-CRT2                | 1 | 0.20 | 1.05 | 1.07   | 1.04   | 1.03 | 0.19  | 0.8461  |
| L-CRT1:L-CRT + consolidation            | 2 | 0.54 | 1.07 | 1.04   | 1.11   | 0.94 | -0.63 | 0.5260  |

|                              |   |      |      |      |      |      |       |        |
|------------------------------|---|------|------|------|------|------|-------|--------|
| L-CRT + consolidation:L-CRT2 | 1 | 0.34 | 1.02 | 1.00 | 1.03 | 0.97 | -0.29 | 0.7735 |
| L-CRT1:L-CRT2                | 8 | 0.78 | 1.10 | 1.10 | 1.09 | 1.00 | 0.04  | 0.9708 |
| L-CRT1:S-RT + consolidation  | 3 | 0.81 | 1.11 | 1.10 | 1.16 | 0.95 | -0.43 | 0.6689 |
| L-CRT2:S-RT + consolidation  | 1 | 0.25 | 1.01 | 1.05 | 1.00 | 1.05 | 0.43  | 0.6689 |

Legend:

comparison - Treatment comparison  
k - Number of studies providing direct evidence  
prop - Direct evidence proportion  
nma - Estimated treatment effect (RR) in network meta-analysis  
direct - Estimated treatment effect (RR) derived from direct evidence  
indir. - Estimated treatment effect (RR) derived from indirect evidence  
RoR - Ratio of Ratios (direct versus indirect)  
z - z-value of test for disagreement (direct versus indirect)  
p-value - p-value of test for disagreement (direct versus indirect)

**Netrank** Higher p-score values indicate higher ranking of treatments

|                       | P-score |
|-----------------------|---------|
| L-RT                  | 0.9894  |
| S-RTearly             | 0.7106  |
| L-CRT1                | 0.6395  |
| CHT                   | 0.6333  |
| Induction + L-CRT     | 0.4059  |
| L-CRT + consolidation | 0.2893  |
| L-CRT2                | 0.1778  |
| S-RT + consolidation  | 0.1542  |

## eAppendix 8. Toxicity of treatment

### Characteristics of the network

Number of treatments:

8

Number of studies:

22

Number of individuals included:

11568

Number of individuals randomized to each treatment:

|   | Treatment name        | N. individuals randomized |
|---|-----------------------|---------------------------|
| 1 | CHT                   | 885                       |
| 2 | Induction + L-CRT     | 469                       |
| 3 | L-CRT + consolidation | 263                       |
| 4 | L-CRT1                | 5243                      |
| 5 | L-CRT2                | 3004                      |
| 6 | L-RT                  | 367                       |
| 7 | S-RT + consolidation  | 1021                      |
| 8 | S-RTearly             | 316                       |

### Pairwise meta-analysis

Risk ratios above 1 favor the first treatment of the comparison.

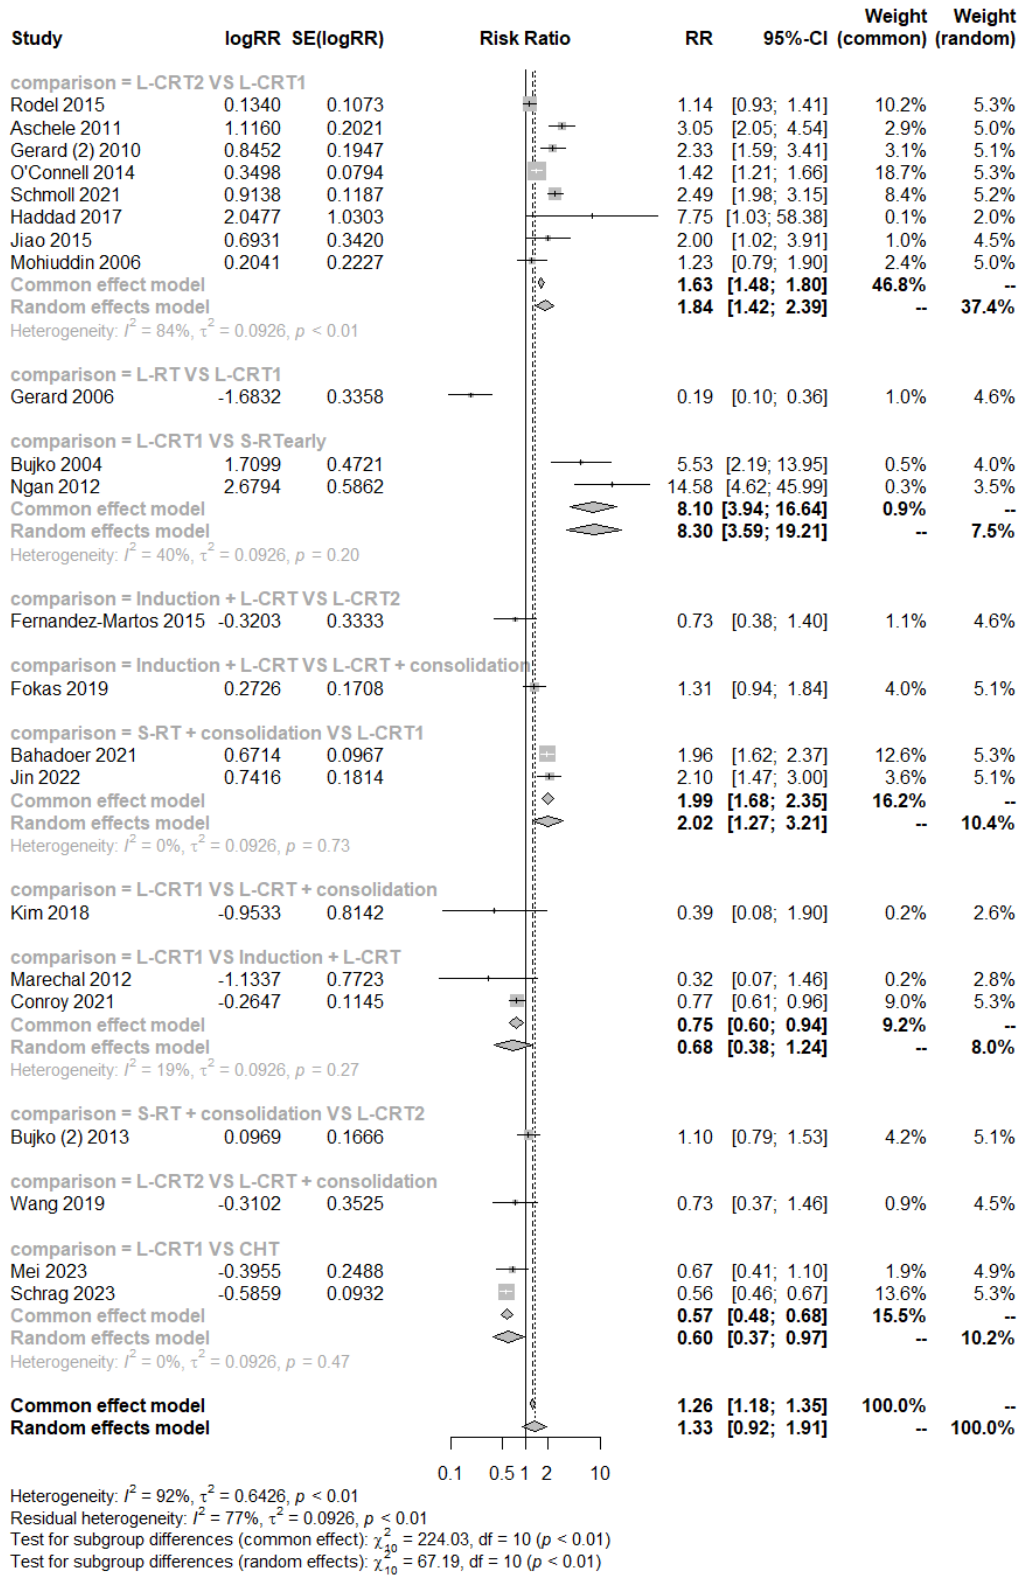

**Network map** The thickness of lines is proportional to the number of studies comparing the two treatments and the size of circles is proportional to the number of individuals for each treatment.

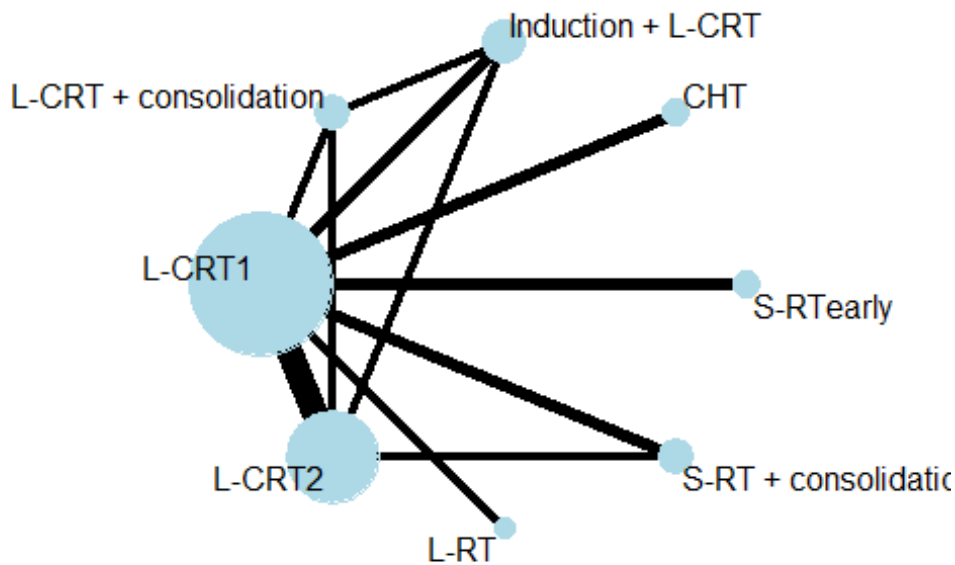

**Netleague table** Relative risks (RRs) and 95% confidence intervals (CIs) are reported. Results of the network meta-analysis are reported in the lower left part of the table and results from the pairwise meta-analysis are reported in the upper right part of the table. RRs higher than 1 favor the column-defining treatment.

|   | V1                    | V2                    | V3                    | V4                   | V5                    | V6                   | V7                    | V8                   |
|---|-----------------------|-----------------------|-----------------------|----------------------|-----------------------|----------------------|-----------------------|----------------------|
| 1 | CHT                   | .                     | .                     | 1.67 (1.06 to 2.64)  | .                     | .                    | .                     | .                    |
| 2 | 1.02 (0.54 to 1.93)   | Induction + L-CRT     | 1.31 (0.69 to 2.51)   | 1.45 (0.83 to 2.54)  | 0.73 (0.31 to 1.71)   | .                    | .                     | .                    |
| 3 | 1.01 (0.49 to 2.11)   | 0.99 (0.58 to 1.68)   | L-CRT + consolidation | 2.59 (0.48 to 14.06) | 1.36 (0.56 to 3.31)   | .                    | .                     | .                    |
| 4 | 1.67 (1.06 to 2.64)   | 1.63 (1.06 to 2.52)   | 1.65 (0.93 to 2.93)   | L-CRT1               | 0.55 (0.43 to 0.70)   | 5.38 (2.27 to 12.74) | 0.50 (0.32 to 0.77)   | 8.28 (3.63 to 18.89) |
| 5 | 0.92 (0.55 to 1.54)   | 0.90 (0.58 to 1.41)   | 0.91 (0.51 to 1.61)   | 0.55 (0.44 to 0.69)  | L-CRT2                | .                    | 0.91 (0.48 to 1.73)   | .                    |
| 6 | 8.99 (3.39 to 23.86)  | 8.78 (3.34 to 23.07)  | 8.88 (3.15 to 25.01)  | 5.38 (2.27 to 12.74) | 9.75 (4.00 to 23.76)  | L-RT                 | .                     | .                    |
| 7 | 0.83 (0.46 to 1.50)   | 0.81 (0.46 to 1.42)   | 0.82 (0.42 to 1.60)   | 0.50 (0.34 to 0.72)  | 0.90 (0.61 to 1.34)   | 0.09 (0.04 to 0.24)  | S-RT + consolidation  | .                    |
| 8 | 13.83 (5.38 to 35.52) | 13.52 (5.32 to 34.34) | 13.66 (5.00 to 37.31) | 8.28 (3.63 to 18.89) | 15.00 (6.38 to 35.27) | 1.54 (0.47 to 5.07)  | 16.66 (6.75 to 41.12) | S-RTearly            |

**Forest plot** L-CRT-1 was used as a common comparator. RRs above 1 favor the strategy over the common comparator (L-CRT1).

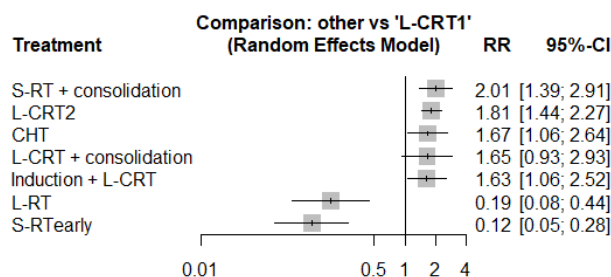

### Assessment of heterogeneity and consistency

#### Global heterogeneity

We interpreted  $\tau^2$  as follows: heterogeneity low with  $\tau^2 \leq 0.010$ , moderate with  $0.010 < \tau^2 \leq 0.242$ , high with  $\tau^2 > 0.242$ , and  $I^2$  statistics as follows: not important (0%-40%), moderate (30%-60%), substantial (50%-90%), considerable (75%-100%).

$\tau^2 = 0.0805$  ;  $\tau = 0.2837$

$I^2 = 71.54\%$  ( 52.87 % to 82.82 %)

Consistency: global approach

Q statistic to assess consistency under the assumption of a full design-by-treatment interaction random effects model

Q statistics to assess homogeneity / consistency

|                 | Q     | df | p-value  |
|-----------------|-------|----|----------|
| Total           | 52.71 | 15 | < 0.0001 |
| Within designs  | 47.61 | 11 | < 0.0001 |
| Between designs | 5.11  | 4  | 0.2765   |

Design-specific decomposition of within-designs Q statistic

| Design                      | Q     | df | p-value  |
|-----------------------------|-------|----|----------|
| L-CRT1:CHT                  | 0.51  | 1  | 0.4737   |
| L-CRT1:Induction + L-CRT    | 1.24  | 1  | 0.2657   |
| L-CRT1:L-CRT2               | 44.08 | 7  | < 0.0001 |
| L-CRT1:S-RT + consolidation | 0.12  | 1  | 0.7328   |
| L-CRT1:S-RTearly            | 1.66  | 1  | 0.1978   |

Between-designs Q statistic after detaching of single designs

| Detached design                         | Q    | df | p-value |
|-----------------------------------------|------|----|---------|
| Induction + L-CRT:L-CRT + consolidation | 0.40 | 3  | 0.9403  |
| Induction + L-CRT:L-CRT2                | 4.82 | 3  | 0.1857  |
| L-CRT + consolidation:L-CRT2            | 1.66 | 3  | 0.6448  |
| L-CRT1:Induction + L-CRT                | 3.81 | 3  | 0.2827  |
| L-CRT1:L-CRT + consolidation            | 4.28 | 3  | 0.2329  |
| L-CRT1:L-CRT2                           | 5.11 | 3  | 0.1642  |
| L-CRT1:S-RT + consolidation             | 4.79 | 3  | 0.1882  |
| L-CRT2:S-RT + consolidation             | 4.79 | 3  | 0.1882  |

Q statistic to assess consistency under the assumption of a full design-by-treatment interaction random effects model

|                 | Q    | df | p-value | $\tau$ .within | $\tau^2$ .within |
|-----------------|------|----|---------|----------------|------------------|
| Between designs | 2.00 | 4  | 0.7349  | 0.3105         | 0.0964           |

Consistency: local approach

Separate indirect from direct evidence (SIDE) using back-calculation method

Random effects model:

| comparison                              | k | prop | nma  | direct | indir. | RoR  | z     | p-value |
|-----------------------------------------|---|------|------|--------|--------|------|-------|---------|
| Induction + L-CRT:L-CRT + consolidation | 1 | 0.67 | 0.99 | 1.31   | 0.56   | 2.35 | 1.48  | 0.1375  |
| L-CRT1:Induction + L-CRT                | 2 | 0.60 | 0.61 | 0.69   | 0.51   | 1.35 | 0.66  | 0.5094  |
| Induction + L-CRT:L-CRT2                | 1 | 0.27 | 0.90 | 0.73   | 0.98   | 0.74 | -0.58 | 0.5623  |
| L-CRT1:L-CRT + consolidation            | 1 | 0.12 | 0.61 | 0.39   | 0.64   | 0.60 | -0.56 | 0.5764  |
| L-CRT + consolidation:L-CRT2            | 1 | 0.41 | 0.91 | 1.36   | 0.69   | 1.99 | 1.17  | 0.2440  |
| L-CRT1:L-CRT2                           | 8 | 0.84 | 0.55 | 0.55   | 0.59   | 0.93 | -0.25 | 0.8064  |
| L-CRT1:S-RT + consolidation             | 2 | 0.71 | 0.50 | 0.50   | 0.50   | 0.99 | -0.03 | 0.9757  |
| L-CRT2:S-RT + consolidation             | 1 | 0.37 | 0.90 | 0.91   | 0.90   | 1.01 | 0.03  | 0.9757  |

Legend:

comparison - Treatment comparison  
k - Number of studies providing direct evidence  
prop - Direct evidence proportion

nma - Estimated treatment effect (RR) in network meta-analysis  
 direct - Estimated treatment effect (RR) derived from direct evidence  
 indir. - Estimated treatment effect (RR) derived from indirect evidence  
 RoR - Ratio of Ratios (direct versus indirect)  
 z - z-value of test for disagreement (direct versus indirect)  
 p-value - p-value of test for disagreement (direct versus indirect)

**Netrank** Higher p-score values indicate higher ranking of treatments

|                       | P-score |
|-----------------------|---------|
| S-RT + consolidation  | 0.8454  |
| L-CRT2                | 0.7465  |
| CHT                   | 0.6675  |
| L-CRT + consolidation | 0.6590  |
| Induction + L-CRT     | 0.6428  |
| L-CRT1                | 0.2960  |
| L-RT                  | 0.1087  |
| S-RTearly             | 0.0342  |

## eAppendix 9. Dropouts by any cause

### Characteristics of the network

Number of treatments:

9

Number of studies:

27

Number of individuals included:

13383

Number of individuals randomized to each treatment:

|   | Treatment name        | N. individuals randomized |
|---|-----------------------|---------------------------|
| 1 | CHT                   | 1050                      |
| 2 | Induction + L-CRT     | 469                       |
| 3 | L-CRT + consolidation | 288                       |
| 4 | L-CRT1                | 6075                      |
| 5 | L-CRT2                | 3147                      |
| 6 | L-RT                  | 872                       |
| 7 | S-RT + consolidation  | 1090                      |
| 8 | S-RTdelayed           | 75                        |
| 9 | S-RTearly             | 317                       |

### Pairwise meta-analysis

Risk ratios above 1 favor the first treatment of the comparison.



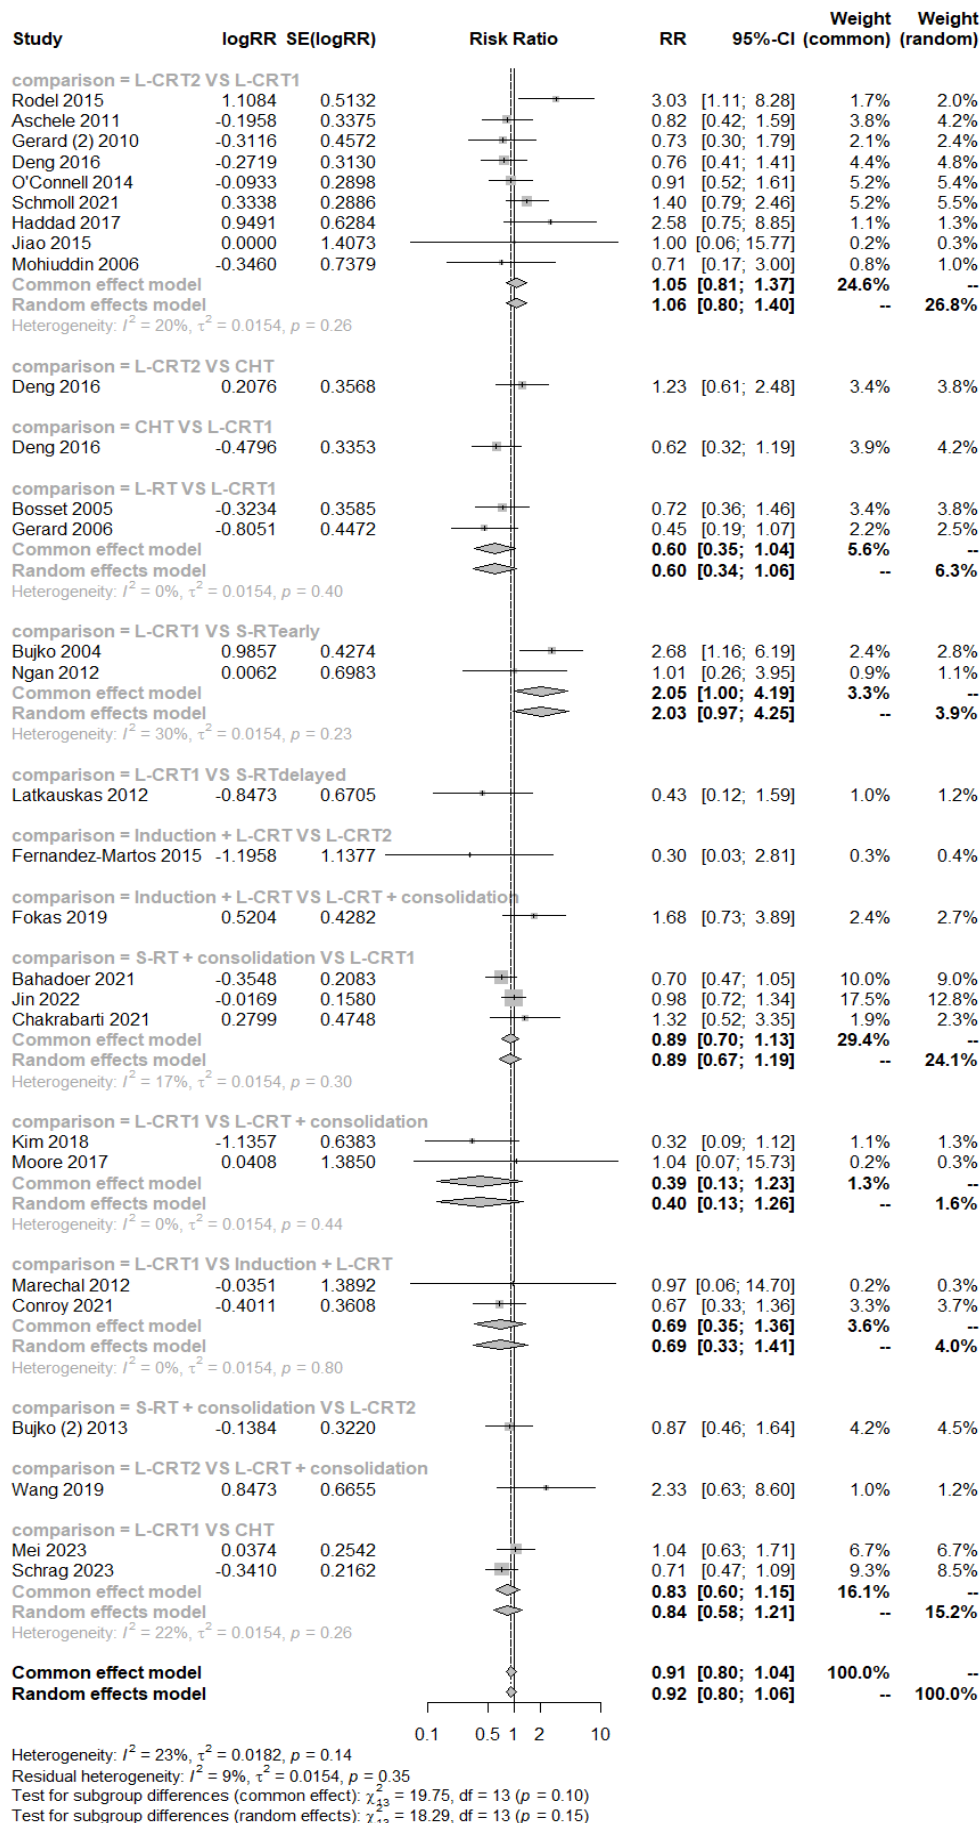

**Network map** The thickness of lines is proportional to the number of studies comparing the two treatments and the size of circles is proportional to the number of individuals for each treatment.

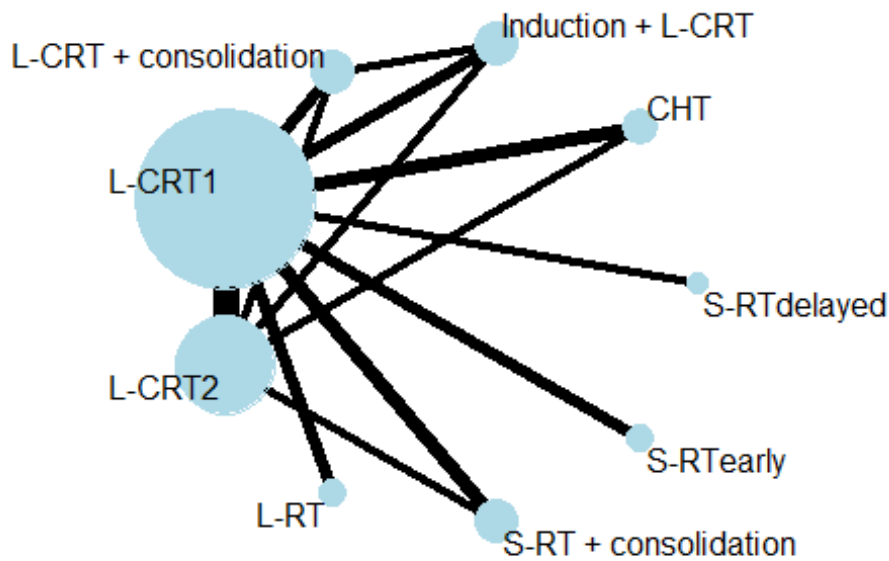

**Netleague table** Relative risks (RRs) and 95% confidence intervals (CIs) are reported. Results of the network meta-analysis are reported in the lower left part of the table and results from the pairwise meta-analysis are reported in the upper right part of the table. RRs higher than 1 favor the column-defining treatment.

|   | V1                  | V2                  | V3                    | V4                  | V5                  | V6                  | V7                   | V8                  | V9                  |
|---|---------------------|---------------------|-----------------------|---------------------|---------------------|---------------------|----------------------|---------------------|---------------------|
| 1 | CHT                 | .                   | .                     | 1.02 (0.72 to 1.46) | 0.81 (0.37 to 1.77) | .                   | .                    | .                   | .                   |
| 2 | 0.74 (0.36 to 1.50) | Induction + L-CRT   | 1.68 (0.68 to 4.17)   | 1.45 (0.68 to 3.09) | 0.30 (0.03 to 2.89) | .                   | .                    | .                   | .                   |
| 3 | 1.02 (0.46 to 2.23) | 1.38 (0.68 to 2.81) | L-CRT + consolidation | 2.51 (0.78 to 8.10) | 0.43 (0.11 to 1.65) | .                   | .                    | .                   | .                   |
| 4 | 1.05 (0.74 to 1.48) | 1.42 (0.76 to 2.66) | 1.03 (0.51 to 2.09)   | L-CRT1              | 0.94 (0.70 to 1.26) | 1.68 (0.92 to 3.07) | 1.12 (0.81 to 1.56)  | 2.01 (0.94 to 4.31) | 0.43 (0.11 to 1.67) |
| 5 | 0.91 (0.60 to 1.39) | 1.24 (0.64 to 2.41) | 0.90 (0.44 to 1.86)   | 0.87 (0.67 to 1.14) | L-CRT2              | .                   | 1.15 (0.56 to 2.35)  | .                   | .                   |
| 6 | 1.76 (0.88 to 3.53) | 2.39 (1.00 to 5.70) | 1.73 (0.68 to 4.38)   | 1.68 (0.92 to 3.07) | 1.93 (1.00 to 3.72) | L-RT                | .                    | .                   | .                   |
| 7 | 1.15 (0.73 to 1.82) | 1.56 (0.78 to 3.12) | 1.13 (0.53 to 2.43)   | 1.10 (0.81 to 1.49) | 1.26 (0.87 to 1.82) | 0.65 (0.33 to 1.28) | S-RT + consolidation | .                   | .                   |
| 8 | 2.11 (0.91 to 4.87) | 2.86 (1.07 to 7.68) | 2.07 (0.73 to 5.86)   | 2.01 (0.94 to 4.31) | 2.31 (1.03 to 5.17) | 1.20 (0.45 to 3.16) | 1.83 (0.81 to 4.16)  | S-RTearly           | .                   |
| 9 | 0.45 (0.11 to 1.82) | 0.61 (0.14 to 2.72) | 0.44 (0.10 to 2.04)   | 0.43 (0.11 to 1.67) | 0.49 (0.12 to 1.96) | 0.25 (0.06 to 1.12) | 0.39 (0.10 to 1.57)  | 0.21 (0.04 to 1.01) | S-RTdelayed         |

**Forest plot** L-CRT-1 was used as a common comparator. RRs above 1 favor the strategy over the common comparator (L-CRT1).

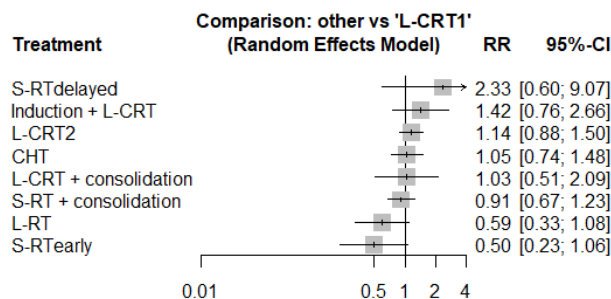

**Assessment of heterogeneity and consistency**

*Global heterogeneity*

We interpreted  $\tau^2$  as follows: heterogeneity low with  $\tau^2 \leq 0.010$ , moderate with  $0.010 < \tau^2 \leq 0.242$ , high with  $\tau^2 > 0.242$ , and  $I^2$  statistics as follows: not important (0%-40%), moderate (30%-60%), substantial (50%-90%), considerable (75%-100%).

$\tau^2 = 0.0306$  ;  $\tau = 0.1748$

$I^2 = 17.86\%$  ( 0 % to 51.45 %)

Consistency: *global approach*

Q statistic to assess consistency under the assumption of a full design-by-treatment interaction random effects model

Q statistics to assess homogeneity / consistency

|                 | Q     | df | p-value |
|-----------------|-------|----|---------|
| Total           | 24.35 | 20 | 0.2274  |
| Within designs  | 15.20 | 14 | 0.3648  |
| Between designs | 9.15  | 6  | 0.1652  |

Design-specific decomposition of within-designs Q statistic

| Design                       | Q    | df | p-value |
|------------------------------|------|----|---------|
| L-CRT1:CHT                   | 1.29 | 1  | 0.2569  |
| L-CRT1:Induction + L-CRT     | 0.07 | 1  | 0.7987  |
| L-CRT1:L-CRT + consolidation | 0.60 | 1  | 0.4404  |
| L-CRT1:L-CRT2                | 8.71 | 7  | 0.2740  |
| L-CRT1:L-RT                  | 0.71 | 1  | 0.4007  |
| L-CRT1:S-RT + consolidation  | 2.40 | 2  | 0.3009  |
| L-CRT1:S-RTearly             | 1.43 | 1  | 0.2315  |

Between-designs Q statistic after detaching of single designs

| Detached design                         | Q    | df | p-value |
|-----------------------------------------|------|----|---------|
| Induction + L-CRT:L-CRT + consolidation | 8.67 | 5  | 0.1228  |
| Induction + L-CRT:L-CRT2                | 7.42 | 5  | 0.1912  |
| L-CRT + consolidation:L-CRT2            | 7.38 | 5  | 0.1942  |
| L-CRT1:CHT                              | 7.09 | 5  | 0.2143  |
| L-CRT1:Induction + L-CRT                | 9.15 | 5  | 0.1034  |
| L-CRT1:L-CRT + consolidation            | 5.41 | 5  | 0.3680  |
| L-CRT1:L-CRT2                           | 9.15 | 5  | 0.1033  |
| L-CRT1:S-RT + consolidation             | 9.07 | 5  | 0.1063  |
| L-CRT2:S-RT + consolidation             | 9.07 | 5  | 0.1063  |
| L-CRT1:CHT:L-CRT2                       | 5.49 | 4  | 0.2406  |

Q statistic to assess consistency under the assumption of a full design-by-treatment interaction random effects model

|                 | Q    | df | p-value | $\tau$ .within | $\tau^2$ .within |
|-----------------|------|----|---------|----------------|------------------|
| Between designs | 8.56 | 6  | 0.1999  | 0.1085         | 0.0118           |

Consistency: *local approach*

Separate indirect from direct evidence (SIDE) using back-calculation method

Random effects model:

| comparison                              | k | prop | nma  | direct | indir. | RoR  | z     | p-value |
|-----------------------------------------|---|------|------|--------|--------|------|-------|---------|
| L-CRT1:CHT                              | 3 | 0.96 | 0.95 | 0.98   | 0.52   | 1.87 | 0.68  | 0.4946  |
| CHT:L-CRT2                              | 1 | 0.29 | 0.91 | 0.81   | 0.96   | 0.85 | -0.35 | 0.7229  |
| Induction + L-CRT:L-CRT + consolidation | 1 | 0.61 | 1.38 | 1.68   | 1.01   | 1.67 | 0.69  | 0.4920  |
| L-CRT1:Induction + L-CRT                | 2 | 0.69 | 0.70 | 0.69   | 0.74   | 0.93 | -0.10 | 0.9220  |
| Induction + L-CRT:L-CRT2                | 1 | 0.09 | 1.24 | 0.30   | 1.42   | 0.21 | -1.28 | 0.1993  |

|                              |   |      |      |      |      |      |       |        |
|------------------------------|---|------|------|------|------|------|-------|--------|
| L-CRT1:L-CRT + consolidation | 2 | 0.36 | 0.97 | 0.40 | 1.62 | 0.25 | -1.87 | 0.0619 |
| L-CRT + consolidation:L-CRT2 | 1 | 0.29 | 0.90 | 0.43 | 1.22 | 0.35 | -1.28 | 0.2009 |
| L-CRT1:L-CRT2                | 9 | 0.82 | 0.87 | 0.94 | 0.62 | 1.52 | 1.17  | 0.2438 |
| L-CRT1:S-RT + consolidation  | 3 | 0.85 | 1.10 | 1.12 | 0.99 | 1.13 | 0.29  | 0.7720 |
| L-CRT2:S-RT + consolidation  | 1 | 0.27 | 1.26 | 1.15 | 1.30 | 0.88 | -0.29 | 0.7720 |

Legend:

- comparison - Treatment comparison
- k - Number of studies providing direct evidence
- prop - Direct evidence proportion
- nma - Estimated treatment effect (RR) in network meta-analysis
- direct - Estimated treatment effect (RR) derived from direct evidence
- indir. - Estimated treatment effect (RR) derived from indirect evidence
- RoR - Ratio of Ratios (direct versus indirect)
- z - z-value of test for disagreement (direct versus indirect)
- p-value - p-value of test for disagreement (direct versus indirect)

**Netrank** Higher p-score values indicate higher ranking of treatments

|                       | P-score |
|-----------------------|---------|
| S-RTdelayed           | 0.8802  |
| Induction + L-CRT     | 0.7914  |
| L-CRT2                | 0.6712  |
| CHT                   | 0.5525  |
| L-CRT + consolidation | 0.5192  |
| L-CRT1                | 0.4899  |
| S-RT + consolidation  | 0.3812  |
| L-RT                  | 0.1322  |
| S-RTearly             | 0.0822  |

## eAppendix 10. Pre-operative treatment related deaths

### Characteristics of the network

Number of treatments:

8

Number of studies:

24

Number of individuals included:

11963

Number of individuals randomized to each treatment:

|   | Treatment name        | N. individuals randomized |
|---|-----------------------|---------------------------|
| 1 | CHT                   | 1050                      |
| 2 | Induction + L-CRT     | 469                       |
| 3 | L-CRT + consolidation | 288                       |
| 4 | L-CRT1                | 5359                      |
| 5 | L-CRT2                | 2519                      |
| 6 | L-RT                  | 872                       |
| 7 | S-RT + consolidation  | 1090                      |
| 8 | S-RTearly             | 316                       |

### Pairwise meta-analysis

Risk ratios above 1 favor the first treatment of the comparison.

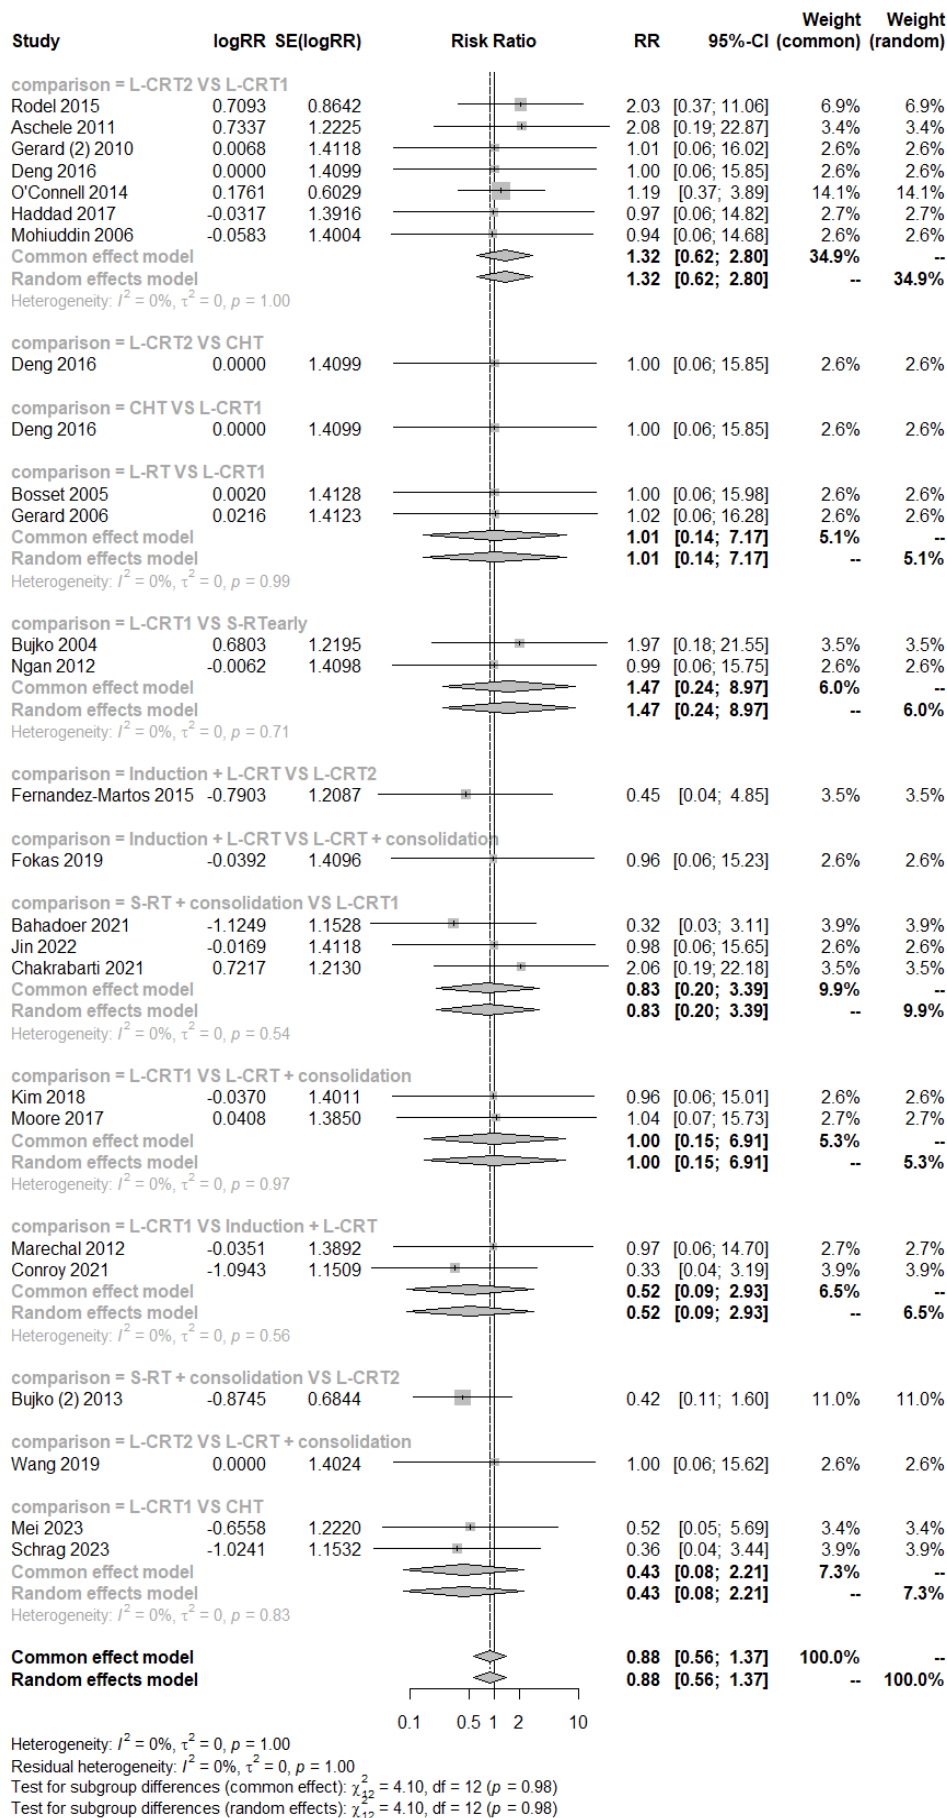

**Network map** The thickness of lines is proportional to the number of studies comparing the two treatments and the size of circles is proportional to the number of individuals for each treatment.

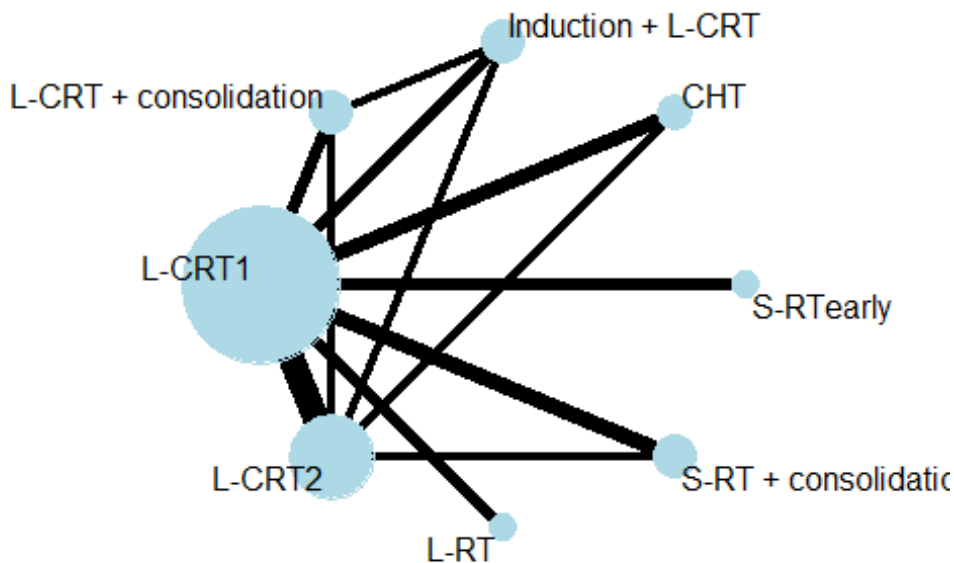

**Netleague table** Relative risks (RRs) and 95% confidence intervals (CIs) are reported. Results of the network meta-analysis are reported in the lower left part of the table and results from the pairwise meta-analysis are reported in the upper right part of the table. RRs higher than 1 favor the column-defining treatment.

|   | V1                   | V2                   | V3                    | V4                   | V5                   | V6                   | V7                   | V8                  |
|---|----------------------|----------------------|-----------------------|----------------------|----------------------|----------------------|----------------------|---------------------|
| 1 | CHT                  | .                    | .                     | 1.87 (0.46 to 7.70)  | 1.00 (0.06 to 15.85) | .                    | .                    | .                   |
| 2 | 1.46 (0.23 to 9.50)  | Induction + L-CRT    | 0.96 (0.06 to 15.23)  | 1.94 (0.34 to 11.03) | 0.45 (0.04 to 4.85)  | .                    | .                    | .                   |
| 3 | 1.60 (0.23 to 11.33) | 1.09 (0.20 to 5.85)  | L-CRT + consolidation | 1.00 (0.14 to 6.88)  | 1.00 (0.06 to 15.62) | .                    | .                    | .                   |
| 4 | 1.90 (0.49 to 7.39)  | 1.30 (0.35 to 4.77)  | 1.19 (0.29 to 4.93)   | L-CRT1               | 0.76 (0.36 to 1.61)  | 0.99 (0.14 to 7.00)  | 1.21 (0.29 to 4.94)  | 1.47 (0.24 to 8.97) |
| 5 | 1.28 (0.30 to 5.55)  | 0.88 (0.23 to 3.39)  | 0.80 (0.18 to 3.50)   | 0.68 (0.35 to 1.31)  | L-CRT2               | .                    | 2.40 (0.63 to 9.17)  | .                   |
| 6 | 1.88 (0.17 to 20.33) | 1.28 (0.12 to 13.45) | 1.17 (0.10 to 13.19)  | 0.99 (0.14 to 7.00)  | 1.46 (0.19 to 11.57) | L-RT                 | .                    | .                   |
| 7 | 2.67 (0.50 to 14.41) | 1.83 (0.36 to 9.16)  | 1.67 (0.30 to 9.28)   | 1.41 (0.50 to 3.95)  | 2.09 (0.75 to 5.79)  | 1.43 (0.16 to 13.03) | S-RT + consolidation | .                   |
| 8 | 2.79 (0.29 to 26.82) | 1.91 (0.21 to 17.71) | 1.74 (0.17 to 17.43)  | 1.47 (0.24 to 8.97)  | 2.18 (0.32 to 14.95) | 1.49 (0.10 to 21.39) | 1.05 (0.13 to 8.38)  | S-RTearly           |

**Forest plot** L-CRT-1 was used as a common comparator. RRs above 1 favor the strategy over the common comparator (L-CRT1).

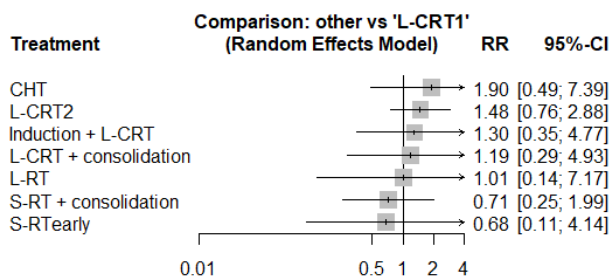

**Assessment of heterogeneity and consistency**

*Global heterogeneity*

We interpreted  $\tau^2$  as follows: heterogeneity low with  $\tau^2 \leq 0.010$ , moderate with  $0.010 < \tau^2 \leq 0.242$ , high with  $\tau^2 > 0.242$ , and  $I^2$  statistics as follows: not important (0%-40%), moderate (30%-60%), substantial (50%-90%), considerable (75%-100%).

$\tau^2 = 0$  ;  $\tau = 0$

$I^2 = 0\%$  ( 0 % to 48.92 %)

Consistency: global approach

Q statistic to assess consistency under the assumption of a full design-by-treatment interaction random effects model

Q statistics to assess homogeneity / consistency

|                 | Q    | df | p-value |
|-----------------|------|----|---------|
| Total           | 3.31 | 18 | 0.9999  |
| Within designs  | 2.33 | 12 | 0.9987  |
| Between designs | 0.98 | 6  | 0.9863  |

Design-specific decomposition of within-designs Q statistic

| Design                       | Q    | df | p-value |
|------------------------------|------|----|---------|
| L-CRT1:CHT                   | 0.05 | 1  | 0.8265  |
| L-CRT1:Induction + L-CRT     | 0.34 | 1  | 0.5571  |
| L-CRT1:L-CRT + consolidation | 0.00 | 1  | 0.9685  |
| L-CRT1:L-CRT2                | 0.56 | 5  | 0.9898  |
| L-CRT1:L-RT                  | 0.00 | 1  | 0.9922  |
| L-CRT1:S-RT + consolidation  | 1.24 | 2  | 0.5386  |
| L-CRT1:S-RTearly             | 0.14 | 1  | 0.7127  |

Between-designs Q statistic after detaching of single designs

| Detached design                         | Q    | df | p-value |
|-----------------------------------------|------|----|---------|
| Induction + L-CRT:L-CRT + consolidation | 0.97 | 5  | 0.9651  |
| Induction + L-CRT:L-CRT2                | 0.54 | 5  | 0.9905  |
| L-CRT + consolidation:L-CRT2            | 0.95 | 5  | 0.9668  |
| L-CRT1:CHT                              | 0.78 | 5  | 0.9780  |
| L-CRT1:Induction + L-CRT                | 0.51 | 5  | 0.9919  |
| L-CRT1:L-CRT + consolidation            | 0.91 | 5  | 0.9692  |
| L-CRT1:L-CRT2                           | 0.79 | 5  | 0.9780  |
| L-CRT1:S-RT + consolidation             | 0.88 | 5  | 0.9714  |
| L-CRT2:S-RT + consolidation             | 0.88 | 5  | 0.9714  |
| L-CRT1:CHT:L-CRT2                       | 0.71 | 4  | 0.9502  |

Q statistic to assess consistency under the assumption of a full design-by-treatment interaction random effects model

|                 | Q    | df | p-value | tau.within | tau2.within |
|-----------------|------|----|---------|------------|-------------|
| Between designs | 0.98 | 6  | 0.9863  | 0          | 0           |

Consistency: local approach

Separate indirect from direct evidence (SIDE) using back-calculation method

Random effects model:

| comparison                              | k | prop | nma  | direct | indir. | RoR  | z     | p-value |
|-----------------------------------------|---|------|------|--------|--------|------|-------|---------|
| L-CRT1:CHT                              | 3 | 0.93 | 0.53 | 0.53   | 0.45   | 1.18 | 0.06  | 0.9490  |
| CHT:L-CRT2                              | 1 | 0.28 | 1.28 | 1.00   | 1.41   | 0.71 | -0.21 | 0.8355  |
| Induction + L-CRT:L-CRT + consolidation | 1 | 0.37 | 1.09 | 0.96   | 1.18   | 0.82 | -0.11 | 0.9088  |
| L-CRT1:Induction + L-CRT                | 2 | 0.56 | 0.77 | 0.52   | 1.30   | 0.40 | -0.69 | 0.4909  |
| Induction + L-CRT:L-CRT2                | 1 | 0.33 | 0.88 | 0.45   | 1.20   | 0.38 | -0.66 | 0.5078  |



|                              |   |      |      |      |      |      |       |        |
|------------------------------|---|------|------|------|------|------|-------|--------|
| L-CRT1:L-CRT + consolidation | 2 | 0.54 | 0.84 | 1.00 | 0.69 | 1.46 | 0.26  | 0.7953 |
| L-CRT + consolidation:L-CRT2 | 1 | 0.29 | 0.80 | 1.00 | 0.73 | 1.37 | 0.19  | 0.8509 |
| L-CRT1:L-CRT2                | 7 | 0.78 | 0.68 | 0.76 | 0.45 | 1.69 | 0.64  | 0.5215 |
| L-CRT1:S-RT + consolidation  | 3 | 0.54 | 1.41 | 1.21 | 1.68 | 0.72 | -0.31 | 0.7532 |
| L-CRT2:S-RT + consolidation  | 1 | 0.58 | 2.09 | 2.40 | 1.72 | 1.39 | 0.31  | 0.7532 |

Legend:

- comparison - Treatment comparison
- k - Number of studies providing direct evidence
- prop - Direct evidence proportion
- nma - Estimated treatment effect (RR) in network meta-analysis
- direct - Estimated treatment effect (RR) derived from direct evidence
- indir. - Estimated treatment effect (RR) derived from indirect evidence
- RoR - Ratio of Ratios (direct versus indirect)
- z - z-value of test for disagreement (direct versus indirect)
- p-value - p-value of test for disagreement (direct versus indirect)

**Netrank** Higher p-score values indicate higher ranking of treatments

|                       | P-score |
|-----------------------|---------|
| CHT                   | 0.7391  |
| L-CRT2                | 0.6839  |
| Induction + L-CRT     | 0.5751  |
| L-CRT + consolidation | 0.5297  |
| L-RT                  | 0.4674  |
| L-CRT1                | 0.4224  |
| S-RTearly             | 0.3156  |
| S-RT + consolidation  | 0.2669  |

## eAppendix 11. Rate of randomized patients who underwent surgery

### Characteristics of the network

#### Characteristics of the network

Number of treatments:

9

Number of studies:

27

Number of individuals included:

13413

Number of individuals randomized to each treatment:

|   | Treatment name        | N. individuals randomized |
|---|-----------------------|---------------------------|
| 1 | CHT                   | 1050                      |
| 2 | Induction + L-CRT     | 469                       |
| 3 | L-CRT + consolidation | 288                       |
| 4 | L-CRT1                | 6084                      |
| 5 | L-CRT2                | 3169                      |
| 6 | L-RT                  | 872                       |
| 7 | S-RT + consolidation  | 1090                      |
| 8 | S-RTdelayed           | 75                        |
| 9 | S-RTearly             | 316                       |

### Pairwise meta-analysis

Risk ratios above 1 favor the first treatment of the comparison.

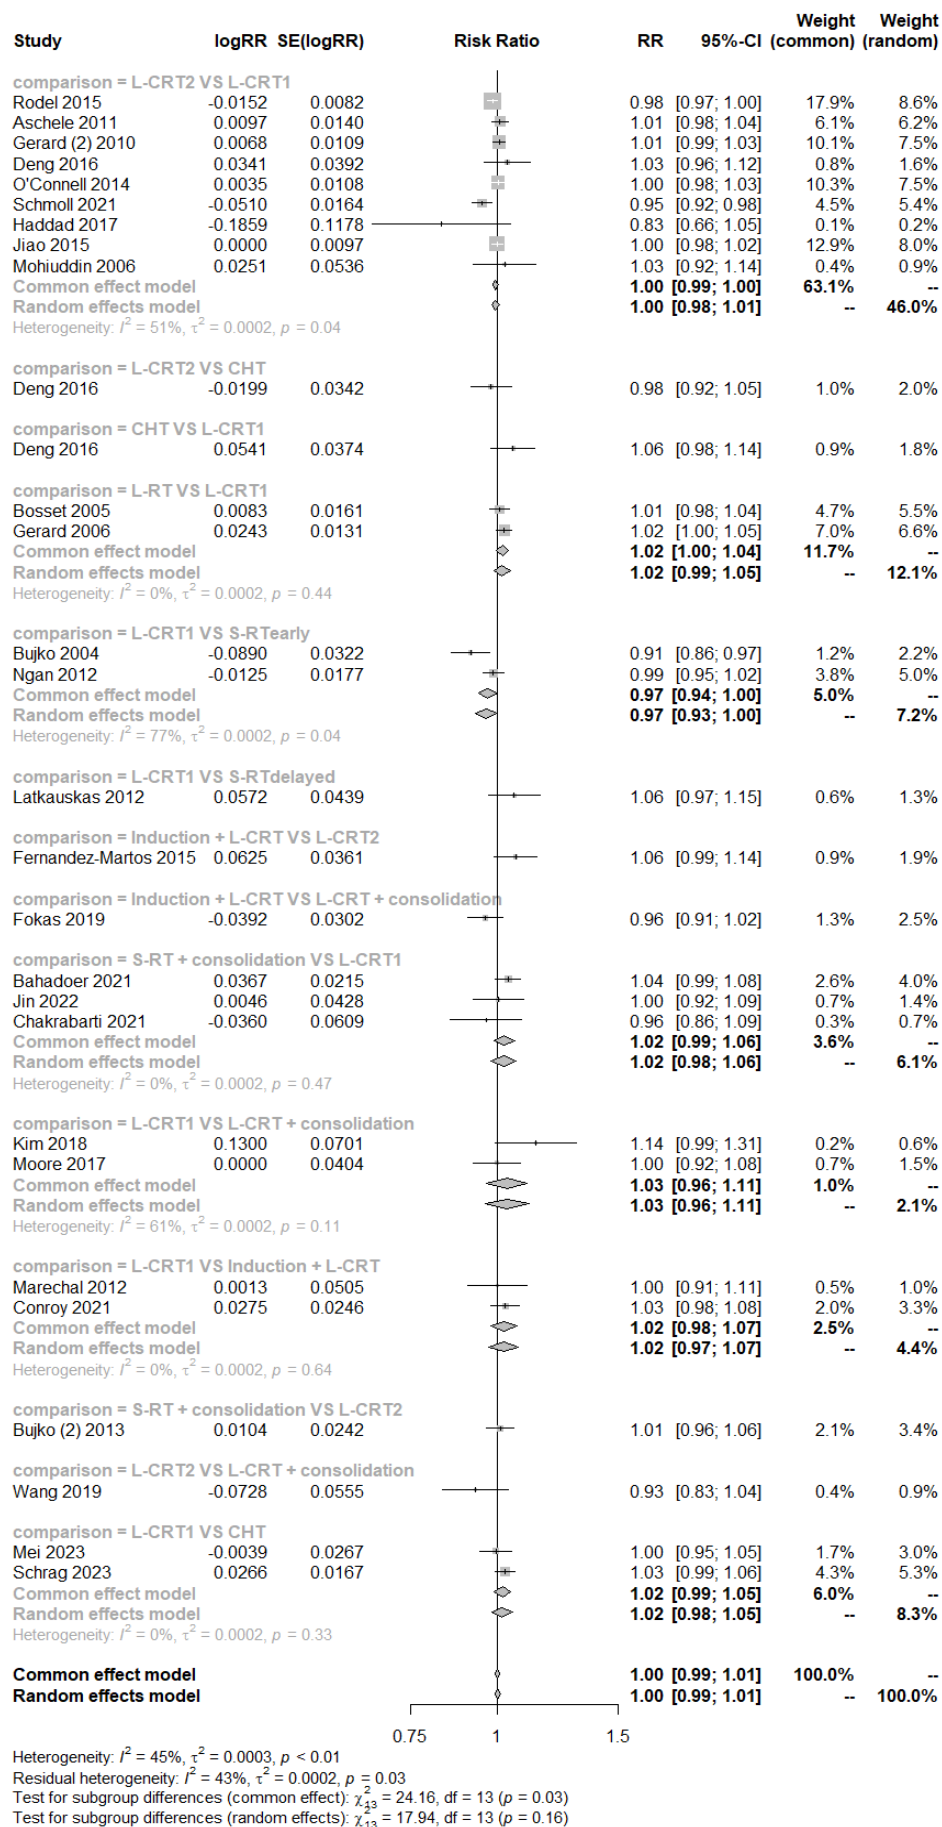

**Network map** The thickness of lines is proportional to the number of studies comparing the two treatments and the size of circles is proportional to the number of individuals for each treatment.

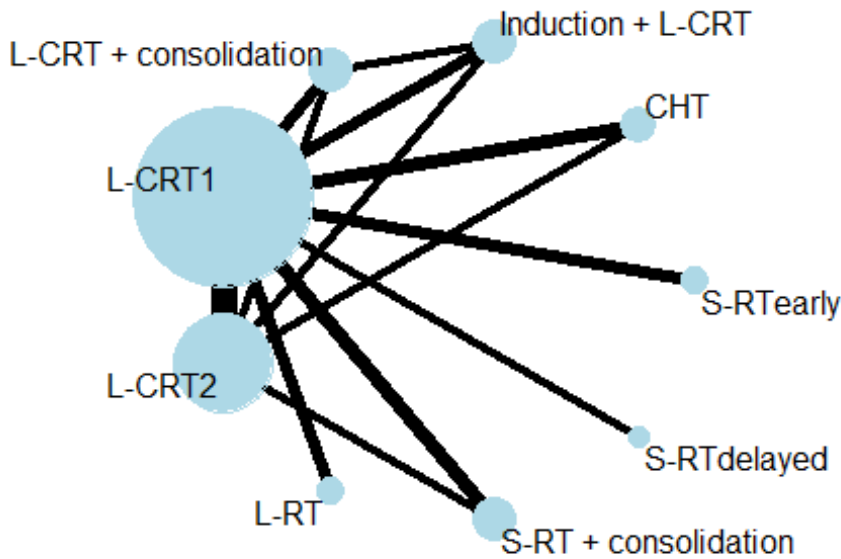

**Netleague table** Relative risks (RRs) and 95% confidence intervals (CIs) are reported. Results of the network meta-analysis are reported in the lower left part of the table and results from the pairwise meta-analysis are reported in the upper right part of the table. RRs higher than 1 favor the column-defining treatment.

|   | V1                  | V2                  | V3                    | V4                  | V5                  | V6                  | V7                   | V8                  | V9                  |
|---|---------------------|---------------------|-----------------------|---------------------|---------------------|---------------------|----------------------|---------------------|---------------------|
| 1 | CHT                 | .                   | .                     | 1.00 (0.96 to 1.03) | 1.02 (0.95 to 1.10) | .                   | .                    | .                   | .                   |
| 2 | 1.00 (0.95 to 1.05) | Induction + L-CRT   | 0.96 (0.90 to 1.03)   | 0.98 (0.93 to 1.03) | 1.06 (0.98 to 1.15) | .                   | .                    | .                   | .                   |
| 3 | 0.98 (0.93 to 1.04) | 0.98 (0.93 to 1.03) | L-CRT + consolidation | 0.97 (0.90 to 1.04) | 1.08 (0.96 to 1.20) | .                   | .                    | .                   | .                   |
| 4 | 1.00 (0.96 to 1.03) | 0.99 (0.96 to 1.03) | 1.01 (0.96 to 1.06)   | L-CRT1              | 1.00 (0.99 to 1.02) | 0.98 (0.95 to 1.01) | 0.98 (0.94 to 1.02)  | 1.06 (0.97 to 1.16) | 0.96 (0.93 to 1.00) |
| 5 | 1.00 (0.97 to 1.04) | 1.00 (0.96 to 1.04) | 1.02 (0.97 to 1.07)   | 1.01 (0.99 to 1.02) | L-CRT2              | .                   | 0.99 (0.93 to 1.05)  | .                   | .                   |
| 6 | 0.98 (0.94 to 1.02) | 0.98 (0.93 to 1.03) | 0.99 (0.94 to 1.05)   | 0.98 (0.95 to 1.01) | 0.97 (0.94 to 1.01) | L-RT                | .                    | .                   | .                   |
| 7 | 0.98 (0.94 to 1.03) | 0.98 (0.93 to 1.03) | 1.00 (0.94 to 1.06)   | 0.99 (0.95 to 1.02) | 0.98 (0.94 to 1.01) | 1.00 (0.96 to 1.05) | S-RT + consolidation | .                   | .                   |
| 8 | 1.05 (0.98 to 1.16) | 1.05 (0.95 to 1.16) | 1.07 (0.97 to 1.19)   | 1.06 (0.97 to 1.16) | 1.05 (0.96 to 1.15) | 1.08 (0.98 to 1.19) | 1.07 (0.97 to 1.18)  | S-RTdelayed         | .                   |
| 9 | 0.96 (0.91 to 1.01) | 0.96 (0.91 to 1.01) | 0.98 (0.92 to 1.04)   | 0.96 (0.93 to 1.00) | 0.96 (0.92 to 1.00) | 0.98 (0.93 to 1.03) | 0.98 (0.93 to 1.03)  | 0.91 (0.82 to 1.01) | S-RTearly           |

**Forest plot** L-CRT-1 was used as a common comparator. RRs above 1 favor the strategy over the common comparator (L-CRT1).

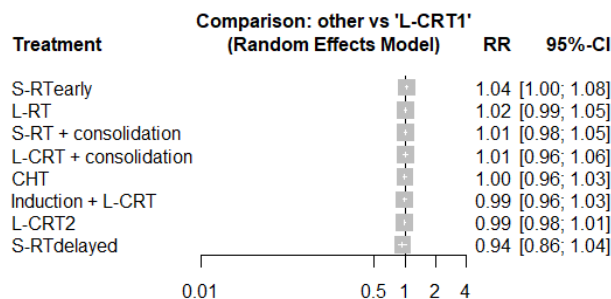

**Assessment of heterogeneity and consistency**

*Global heterogeneity*

We interpreted  $\tau^2$  as follows: heterogeneity low with  $\tau^2 \leq 0.010$ , moderate with  $0.010 < \tau^2 \leq 0.242$ , high with  $\tau^2 > 0.242$ , and  $I^2$  statistics as follows: not important (0%-40%), moderate (30%-60%), substantial (50%-90%), considerable (75%-100%).

$\tau^2 = 3e-04$  ;  $\tau = 0.0164$

$I^2 = 44.04\%$  ( 6.35 % to 66.56 %)

Consistency: *global approach*

Q statistic to assess consistency under the assumption of a full design-by-treatment interaction random effects model

Q statistics to assess homogeneity / consistency

|                 | Q     | df | p-value |
|-----------------|-------|----|---------|
| Total           | 35.74 | 20 | 0.0165  |
| Within designs  | 25.44 | 14 | 0.0304  |
| Between designs | 10.30 | 6  | 0.1127  |

Design-specific decomposition of within-designs Q statistic

| Design                       | Q     | df | p-value |
|------------------------------|-------|----|---------|
| L-CRT1:CHT                   | 0.94  | 1  | 0.3320  |
| L-CRT1:Induction + L-CRT     | 0.22  | 1  | 0.6403  |
| L-CRT1:L-CRT + consolidation | 2.58  | 1  | 0.1080  |
| L-CRT1:L-CRT2                | 15.27 | 7  | 0.0327  |
| L-CRT1:L-RT                  | 0.60  | 1  | 0.4393  |
| L-CRT1:S-RT + consolidation  | 1.52  | 2  | 0.4674  |
| L-CRT1:S-RTearly             | 4.31  | 1  | 0.0378  |

Between-designs Q statistic after detaching of single designs

| Detached design                         | Q    | df | p-value |
|-----------------------------------------|------|----|---------|
| Induction + L-CRT:L-CRT + consolidation | 9.45 | 5  | 0.0923  |
| Induction + L-CRT:L-CRT2                | 6.15 | 5  | 0.2915  |
| L-CRT + consolidation:L-CRT2            | 9.18 | 5  | 0.1020  |
| L-CRT1:CHT                              | 8.11 | 5  | 0.1505  |
| L-CRT1:Induction + L-CRT                | 9.21 | 5  | 0.1010  |
| L-CRT1:L-CRT + consolidation            | 7.36 | 5  | 0.1953  |
| L-CRT1:L-CRT2                           | 9.57 | 5  | 0.0882  |
| L-CRT1:S-RT + consolidation             | 9.84 | 5  | 0.0798  |
| L-CRT2:S-RT + consolidation             | 9.84 | 5  | 0.0798  |
| L-CRT1:CHT:L-CRT2                       | 7.05 | 4  | 0.1333  |

Q statistic to assess consistency under the assumption of a full design-by-treatment interaction random effects model

|                 | Q    | df | p-value | tau.within | tau2.within |
|-----------------|------|----|---------|------------|-------------|
| Between designs | 8.50 | 6  | 0.2037  | 0.0148     | 0.0002      |

Consistency: *local approach*

Separate indirect from direct evidence (SIDE) using back-calculation method

Random effects model:

| comparison                              | k | prop | nma  | direct | indir | RoR  | z     | p-value |
|-----------------------------------------|---|------|------|--------|-------|------|-------|---------|
| L-CRT1:CHT                              | 3 | 0.92 | 1.00 | 1.00   | 1.02  | 0.99 | -0.22 | 0.8271  |
| CHT:L-CRT2                              | 1 | 0.22 | 1.00 | 1.02   | 1.00  | 1.02 | 0.47  | 0.6363  |
| Induction + L-CRT:L-CRT + consolidation | 1 | 0.55 | 0.98 | 0.96   | 1.01  | 0.95 | -0.90 | 0.3681  |
| L-CRT1:Induction + L-CRT                | 2 | 0.58 | 1.01 | 1.02   | 0.99  | 1.03 | 0.85  | 0.3946  |
| Induction + L-CRT:L-CRT2                | 1 | 0.26 | 1.00 | 1.06   | 0.98  | 1.09 | 1.79  | 0.0732  |

|                              |   |      |      |      |      |      |       |        |
|------------------------------|---|------|------|------|------|------|-------|--------|
| L-CRT1:L-CRT + consolidation | 2 | 0.45 | 0.99 | 1.04 | 0.95 | 1.09 | 1.67  | 0.0952 |
| L-CRT + consolidation:L-CRT2 | 1 | 0.19 | 1.02 | 1.08 | 1.01 | 1.07 | 1.01  | 0.3107 |
| L-CRT1:L-CRT2                | 9 | 0.91 | 1.01 | 1.00 | 1.05 | 0.96 | -1.51 | 0.1305 |
| L-CRT1:S-RT + consolidation  | 3 | 0.66 | 0.99 | 0.98 | 1.00 | 0.98 | -0.53 | 0.5961 |
| L-CRT2:S-RT + consolidation  | 1 | 0.39 | 0.98 | 0.99 | 0.97 | 1.02 | 0.53  | 0.5961 |

Legend:

- comparison - Treatment comparison
- k - Number of studies providing direct evidence
- prop - Direct evidence proportion
- nma - Estimated treatment effect (RR) in network meta-analysis
- direct - Estimated treatment effect (RR) derived from direct evidence
- indir. - Estimated treatment effect (RR) derived from indirect evidence
- RoR - Ratio of Ratios (direct versus indirect)
- z - z-value of test for disagreement (direct versus indirect)
- p-value - p-value of test for disagreement (direct versus indirect)

**Netrank** Higher p-score values indicate higher ranking of treatments

|                       | P-score |
|-----------------------|---------|
| S-RTearly             | 0.8927  |
| L-RT                  | 0.7185  |
| S-RT + consolidation  | 0.6686  |
| L-CRT + consolidation | 0.6181  |
| L-CRT1                | 0.4658  |
| CHT                   | 0.3896  |
| Induction + L-CRT     | 0.3578  |
| L-CRT2                | 0.2828  |
| S-RTdelayed           | 0.1062  |

## eAppendix 12. Rate of R0 resections

### Characteristics of the network

Number of treatments:

8

Number of studies:

18

Number of individuals included:

9145

Number of individuals randomized to each treatment:

|   | Treatment name        | N. individuals randomized |
|---|-----------------------|---------------------------|
| 1 | CHT                   | 1050                      |
| 2 | Induction + L-CRT     | 441                       |
| 3 | L-CRT + consolidation | 228                       |
| 4 | L-CRT1                | 4007                      |
| 5 | L-CRT2                | 2093                      |
| 6 | S-RT + consolidation  | 1090                      |
| 7 | S-RTdelayed           | 75                        |
| 8 | S-RTearly             | 161                       |

### Pairwise meta-analysis

Risk ratios above 1 favor the first treatment of the comparison.

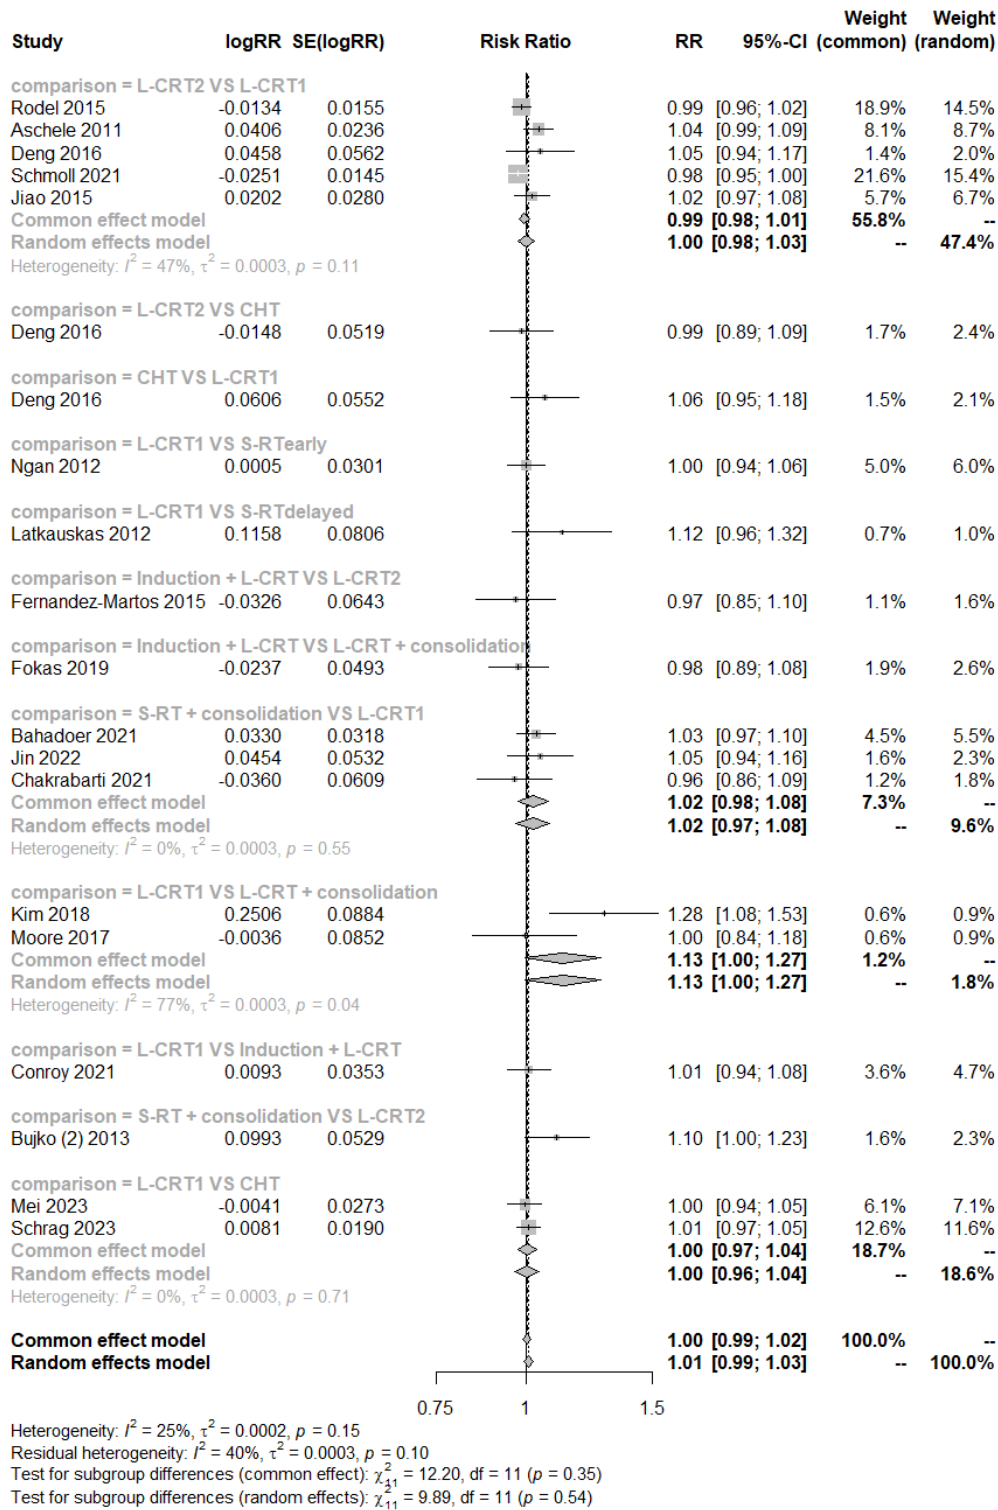

**Network map** The thickness of lines is proportional to the number of studies comparing the two treatments and the size of circles is proportional to the number of individuals for each treatment.



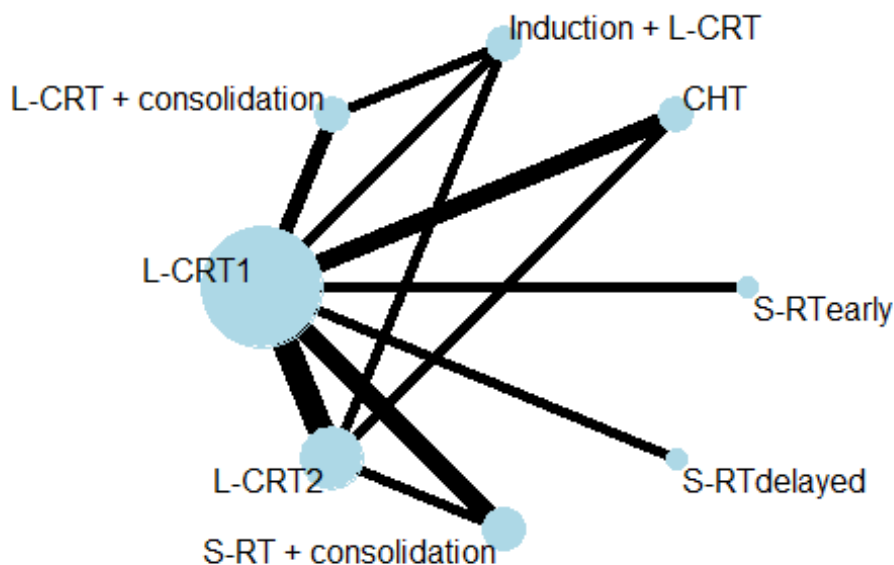

**Netleague table** Relative risks (RRs) and 95% confidence intervals (CIs) are reported. Results of the network meta-analysis are reported in the lower left part of the table and results from the pairwise meta-analysis are reported in the upper right part of the table. RRs higher than 1 favor the column-defining treatment.

|   | V1                  | V2                  | V3                    | V4                  | V5                  | V6                   | V7                  | V8                  |
|---|---------------------|---------------------|-----------------------|---------------------|---------------------|----------------------|---------------------|---------------------|
| 1 | CHT                 | .                   | .                     | 1.00 (0.97 to 1.05) | 1.01 (0.91 to 1.13) | .                    | .                   | .                   |
| 2 | 1.04 (0.96 to 1.12) | Induction + L-CRT   | 0.98 (0.88 to 1.08)   | 0.99 (0.91 to 1.07) | 0.97 (0.85 to 1.10) | .                    | .                   | .                   |
| 3 | 1.06 (0.96 to 1.17) | 1.02 (0.94 to 1.11) | L-CRT + consolidation | 0.89 (0.78 to 1.00) | .                   | .                    | .                   | .                   |
| 4 | 1.00 (0.96 to 1.04) | 0.97 (0.91 to 1.03) | 0.95 (0.87 to 1.03)   | L-CRT1              | 1.00 (0.97 to 1.03) | 0.98 (0.92 to 1.03)  | 1.12 (0.95 to 1.32) | 1.00 (0.93 to 1.07) |
| 5 | 1.01 (0.96 to 1.05) | 0.97 (0.91 to 1.03) | 0.95 (0.87 to 1.04)   | 1.00 (0.98 to 1.03) | L-CRT2              | 0.91 (0.81 to 1.01)  | .                   | .                   |
| 6 | 0.97 (0.91 to 1.03) | 0.93 (0.86 to 1.01) | 0.91 (0.82 to 1.01)   | 0.96 (0.92 to 1.01) | 0.96 (0.91 to 1.01) | S-RT + consolidation | .                   | .                   |
| 7 | 1.13 (0.95 to 1.33) | 1.08 (0.91 to 1.29) | 1.06 (0.88 to 1.28)   | 1.12 (0.95 to 1.32) | 1.12 (0.95 to 1.32) | 1.17 (0.98 to 1.38)  | S-RTdelayed         | .                   |
| 8 | 1.00 (0.93 to 1.09) | 0.97 (0.88 to 1.06) | 0.95 (0.84 to 1.06)   | 1.00 (0.93 to 1.07) | 1.00 (0.92 to 1.08) | 1.04 (0.95 to 1.13)  | 0.89 (0.75 to 1.06) | S-RTearly           |

**Forest plot** L-CRT-1 was used as a common comparator. RRs above 1 favor the strategy over the common comparator (L-CRT1).

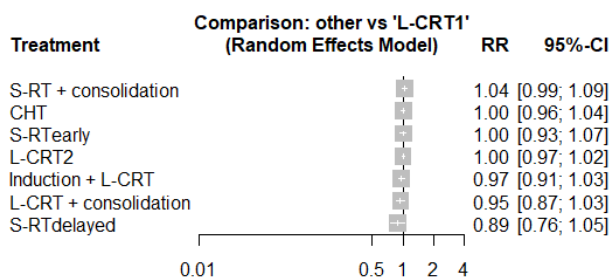

### Assessment of heterogeneity and consistency

#### Global heterogeneity

We interpreted  $\tau^2$  as follows: heterogeneity low with  $\tau^2 \leq 0.010$ , moderate with  $0.010 < \tau^2 \leq 0.242$ , high with  $\tau^2 > 0.242$ , and  $I^2$  statistics as follows: not important (0%-40%), moderate (30%-60%), substantial (50%-90%), considerable (75%-100%).

$\tau^2 = 4e-04$  ;  $\tau = 0.0204$

$I^2 = 31.7\%$  ( 0 % to 64.7 %)

Consistency: global approach

Q statistic to assess consistency under the assumption of a full design-by-treatment interaction random effects model

Q statistics to assess homogeneity / consistency

|                 | Q     | df | p-value |
|-----------------|-------|----|---------|
| Total           | 17.57 | 12 | 0.1294  |
| Within designs  | 12.39 | 7  | 0.0885  |
| Between designs | 5.18  | 5  | 0.3941  |

Design-specific decomposition of within-designs Q statistic

| Design                       | Q    | df | p-value |
|------------------------------|------|----|---------|
| L-CRT1:CHT                   | 0.13 | 1  | 0.7143  |
| L-CRT1:L-CRT + consolidation | 4.29 | 1  | 0.0384  |
| L-CRT1:L-CRT2                | 6.76 | 3  | 0.0800  |
| L-CRT1:S-RT + consolidation  | 1.21 | 2  | 0.5459  |

Between-designs Q statistic after detaching of single designs

| Detached design                         | Q    | df | p-value |
|-----------------------------------------|------|----|---------|
| Induction + L-CRT:L-CRT + consolidation | 2.96 | 4  | 0.5652  |
| Induction + L-CRT:L-CRT2                | 5.17 | 4  | 0.2704  |
| L-CRT1:CHT                              | 4.64 | 4  | 0.3264  |
| L-CRT1:Induction + L-CRT                | 3.79 | 4  | 0.4345  |
| L-CRT1:L-CRT + consolidation            | 2.96 | 4  | 0.5652  |
| L-CRT1:L-CRT2                           | 5.07 | 4  | 0.2803  |
| L-CRT1:S-RT + consolidation             | 3.80 | 4  | 0.4331  |
| L-CRT2:S-RT + consolidation             | 3.80 | 4  | 0.4331  |
| L-CRT1:CHT:L-CRT2                       | 3.75 | 3  | 0.2902  |

Q statistic to assess consistency under the assumption of a full design-by-treatment interaction random effects model

|                 | Q    | df | p-value | $\tau$ .within | $\tau^2$ .within |
|-----------------|------|----|---------|----------------|------------------|
| Between designs | 4.55 | 5  | 0.4738  | 0.0220         | 0.0005           |

Consistency: local approach

Separate indirect from direct evidence (SIDE) using back-calculation method

Random effects model:

| comparison                              | k | prop | nma  | direct | indir. | RoR  | z     | p-value |
|-----------------------------------------|---|------|------|--------|--------|------|-------|---------|
| L-CRT1:CHT                              | 3 | 0.95 | 1.00 | 1.00   | 1.03   | 0.97 | -0.34 | 0.7338  |
| CHT:L-CRT2                              | 1 | 0.17 | 1.01 | 1.01   | 1.00   | 1.01 | 0.18  | 0.8568  |
| Induction + L-CRT:L-CRT + consolidation | 1 | 0.65 | 1.02 | 0.98   | 1.11   | 0.88 | -1.41 | 0.1581  |
| L-CRT1:Induction + L-CRT                | 1 | 0.63 | 1.04 | 1.01   | 1.08   | 0.93 | -1.05 | 0.2942  |
| Induction + L-CRT:L-CRT2                | 1 | 0.25 | 0.97 | 0.97   | 0.97   | 1.00 | 0.00  | 0.9989  |
| L-CRT1:L-CRT + consolidation            | 2 | 0.51 | 1.06 | 1.13   | 0.99   | 1.14 | 1.41  | 0.1581  |
| L-CRT1:L-CRT2                           | 5 | 0.91 | 1.00 | 1.00   | 1.05   | 0.95 | -1.17 | 0.2422  |
| L-CRT1:S-RT + consolidation             | 3 | 0.81 | 0.96 | 0.98   | 0.90   | 1.08 | 1.19  | 0.2339  |
| L-CRT2:S-RT + consolidation             | 1 | 0.23 | 0.96 | 0.91   | 0.98   | 0.93 | -1.19 | 0.2339  |

Legend:

comparison - Treatment comparison  
k - Number of studies providing direct evidence

prop - Direct evidence proportion  
 nma - Estimated treatment effect (RR) in network meta-analysis  
 direct - Estimated treatment effect (RR) derived from direct evidence  
 indir. - Estimated treatment effect (RR) derived from indirect evidence  
 RoR - Ratio of Ratios (direct versus indirect)  
 z - z-value of test for disagreement (direct versus indirect)  
 p-value - p-value of test for disagreement (direct versus indirect)

**Netrank** Higher p-score values indicate higher ranking of treatments

|                       | P-score |
|-----------------------|---------|
| S-RT + consolidation  | 0.9156  |
| CHT                   | 0.6396  |
| L-CRT1                | 0.6114  |
| S-RTearly             | 0.5972  |
| L-CRT2                | 0.5698  |
| Induction + L-CRT     | 0.3192  |
| L-CRT + consolidation | 0.2265  |
| S-RTdelayed           | 0.1206  |

## eAppendix 13. Rate of negative CRM

### Characteristics of the network

Number of treatments:

8

Number of studies:

11

Number of individuals included:

4963

Number of individuals randomized to each treatment:

|   | Treatment name        | N. individuals randomized |
|---|-----------------------|---------------------------|
| 1 | CHT                   | 585                       |
| 2 | Induction + L-CRT     | 415                       |
| 3 | L-CRT + consolidation | 203                       |
| 4 | L-CRT1                | 2312                      |
| 5 | L-CRT2                | 756                       |
| 6 | S-RT + consolidation  | 462                       |
| 7 | S-RTdelayed           | 75                        |
| 8 | S-RTearly             | 155                       |

### Pairwise meta-analysis

Risk ratios above 1 favor the first treatment of the comparison.

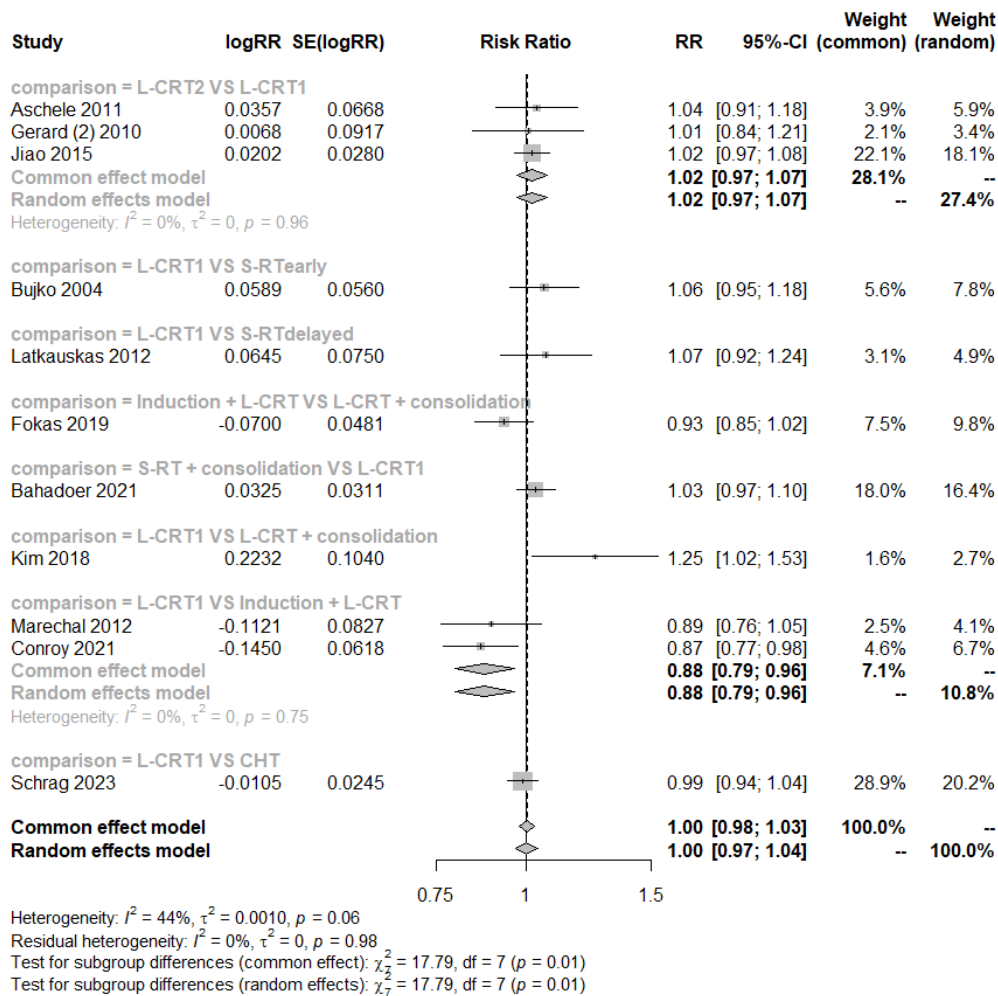

**Network map** The thickness of lines is proportional to the number of studies comparing the two treatments and the size of circles is proportional to the number of individuals for each treatment.

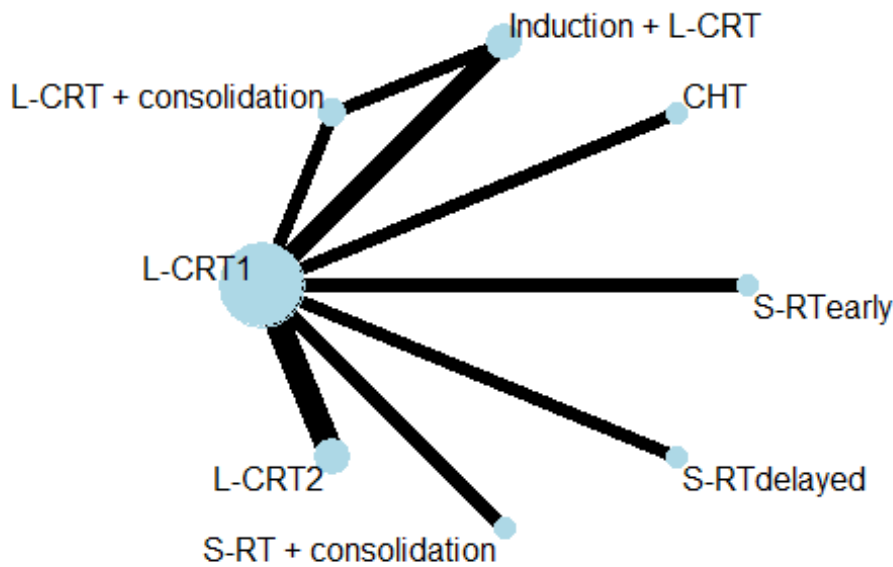

**Netleague table** Relative risks (RRs) and 95% confidence intervals (CIs) are reported. Results of the network meta-analysis are reported in the lower left part of the table and results from the pairwise meta-analysis are reported in the upper right part of the table. RRs higher than 1 favor the column-defining treatment.

|   | V1                  | V2                  | V3                    | V4                  | V5                  | V6                   | V7                  | V8                  |
|---|---------------------|---------------------|-----------------------|---------------------|---------------------|----------------------|---------------------|---------------------|
| 1 | CHT                 | .                   | .                     | 1.01 (0.84 to 1.22) | .                   | .                    | .                   | .                   |
| 2 | 0.96 (0.76 to 1.22) | Induction + L-CRT   | 0.93 (0.76 to 1.14)   | 1.14 (0.97 to 1.34) | .                   | .                    | .                   | .                   |
| 3 | 1.01 (0.78 to 1.32) | 1.06 (0.89 to 1.25) | L-CRT + consolidation | 0.80 (0.61 to 1.05) | .                   | .                    | .                   | .                   |
| 4 | 1.01 (0.84 to 1.22) | 1.05 (0.91 to 1.22) | 1.00 (0.83 to 1.20)   | L-CRT1              | 0.98 (0.86 to 1.11) | 0.97 (0.80 to 1.17)  | 1.07 (0.85 to 1.35) | 1.06 (0.86 to 1.31) |
| 5 | 0.99 (0.79 to 1.24) | 1.03 (0.85 to 1.25) | 0.98 (0.78 to 1.22)   | 0.98 (0.86 to 1.11) | L-CRT2              | .                    | .                   | .                   |
| 6 | 0.98 (0.75 to 1.28) | 1.02 (0.80 to 1.30) | 0.97 (0.74 to 1.26)   | 0.97 (0.80 to 1.17) | 0.99 (0.79 to 1.24) | S-RT + consolidation | .                   | .                   |
| 7 | 1.08 (0.80 to 1.45) | 1.12 (0.85 to 1.48) | 1.06 (0.79 to 1.44)   | 1.07 (0.85 to 1.35) | 1.09 (0.84 to 1.42) | 1.10 (0.82 to 1.49)  | S-RTdelayed         | .                   |
| 8 | 1.07 (0.81 to 1.42) | 1.12 (0.86 to 1.44) | 1.06 (0.80 to 1.41)   | 1.06 (0.86 to 1.31) | 1.08 (0.85 to 1.39) | 1.10 (0.82 to 1.46)  | 0.99 (0.73 to 1.36) | S-RTearly           |

**Forest plot** L-CRT-1 was used as a common comparator. RRs above 1 favor the strategy over the common comparator (L-CRT1).

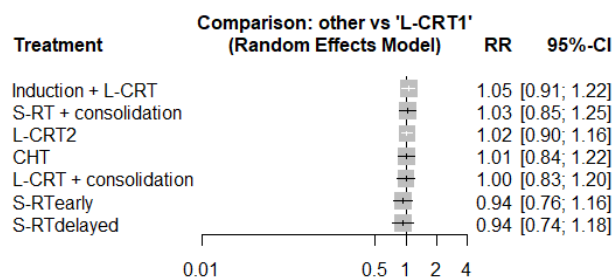

### Assessment of heterogeneity and consistency

#### Global heterogeneity

We interpreted  $\tau^2$  as follows: heterogeneity low with  $\tau^2 \leq 0.010$ , moderate with  $0.010 < \tau^2 \leq 0.242$ , high with  $\tau^2 > 0.242$ , and  $I^2$  statistics as follows: not important (0%-40%), moderate (30%-60%), substantial (50%-90%), considerable (75%-100%).

$\tau^2 = 0.0085$  ;  $\tau = 0.0922$

$I^2 = 66.25\%$  ( 12.07 % to 87.05 %)

Consistency: *global approach*

Q statistic to assess consistency under the assumption of a full design-by-treatment interaction random effects model

Q statistics to assess homogeneity / consistency

|                 | Q     | df | p-value |
|-----------------|-------|----|---------|
| Total           | 11.85 | 4  | 0.0185  |
| Within designs  | 0.17  | 3  | 0.9816  |
| Between designs | 11.68 | 1  | 0.0006  |

Design-specific decomposition of within-designs Q statistic

| Design                   | Q    | df | p-value |
|--------------------------|------|----|---------|
| L-CRT1:Induction + L-CRT | 0.10 | 1  | 0.7495  |
| L-CRT1:L-CRT2            | 0.07 | 2  | 0.9644  |

Between-designs Q statistic after detaching of single designs

| Detached design                         | Q    | df | p-value |
|-----------------------------------------|------|----|---------|
| Induction + L-CRT:L-CRT + consolidation | 0.00 | 0  | --      |
| L-CRT1:Induction + L-CRT                | 0.00 | 0  | --      |
| L-CRT1:L-CRT + consolidation            | 0.00 | 0  | --      |

Q statistic to assess consistency under the assumption of a full design-by-treatment interaction random effects model

|                 | Q     | df | p-value | $\tau$ .within | $\tau^2$ .within |
|-----------------|-------|----|---------|----------------|------------------|
| Between designs | 11.68 | 1  | 0.0006  | 0              | 0                |

Consistency: *local approach*

Separate indirect from direct evidence (SIDE) using back-calculation method

Random effects model:

| comparison                              | k | prop | nma  | direct | indir. | RoR  | z     | p-value |
|-----------------------------------------|---|------|------|--------|--------|------|-------|---------|
| Induction + L-CRT:L-CRT + consolidation | 1 | 0.71 | 1.06 | 0.93   | 1.42   | 0.65 | -2.20 | 0.0276  |
| L-CRT1:Induction + L-CRT                | 2 | 0.82 | 0.95 | 0.88   | 1.34   | 0.65 | -2.20 | 0.0276  |
| L-CRT1:L-CRT + consolidation            | 1 | 0.48 | 1.00 | 1.25   | 0.82   | 1.53 | 2.20  | 0.0276  |

Legend:

- comparison - Treatment comparison
- k - Number of studies providing direct evidence
- prop - Direct evidence proportion
- nma - Estimated treatment effect (RR) in network meta-analysis
- direct - Estimated treatment effect (RR) derived from direct evidence
- indir. - Estimated treatment effect (RR) derived from indirect evidence
- RoR - Ratio of Ratios (direct versus indirect)
- z - z-value of test for disagreement (direct versus indirect)
- p-value - p-value of test for disagreement (direct versus indirect)

**Netrank** Higher p-score values indicate higher ranking of treatments

|                      | P-score |
|----------------------|---------|
| Induction + L-CRT    | 0.7006  |
| S-RT + consolidation | 0.6056  |
| L-CRT2               | 0.5824  |

|                       |        |
|-----------------------|--------|
| CHT                   | 0.5310 |
| L-CRT1                | 0.4795 |
| L-CRT + consolidation | 0.4794 |
| S-RTearly             | 0.3130 |
| S-RTdelayed           | 0.3085 |



## eAppendix 14. Rate of ypN0

### Characteristics of the network

Number of treatments:

9

Number of studies:

21

Number of individuals included:

10070

Number of individuals randomized to each treatment:

|   | Treatment name        | N. individuals randomized |
|---|-----------------------|---------------------------|
| 1 | CHT                   | 885                       |
| 2 | Induction + L-CRT     | 469                       |
| 3 | L-CRT + consolidation | 288                       |
| 4 | L-CRT1                | 4498                      |
| 5 | L-CRT2                | 1732                      |
| 6 | L-RT                  | 872                       |
| 7 | S-RT + consolidation  | 1090                      |
| 8 | S-RTdelayed           | 75                        |
| 9 | S-RTearly             | 161                       |

### Pairwise meta-analysis

Risk ratios above 1 favor the first treatment of the comparison.

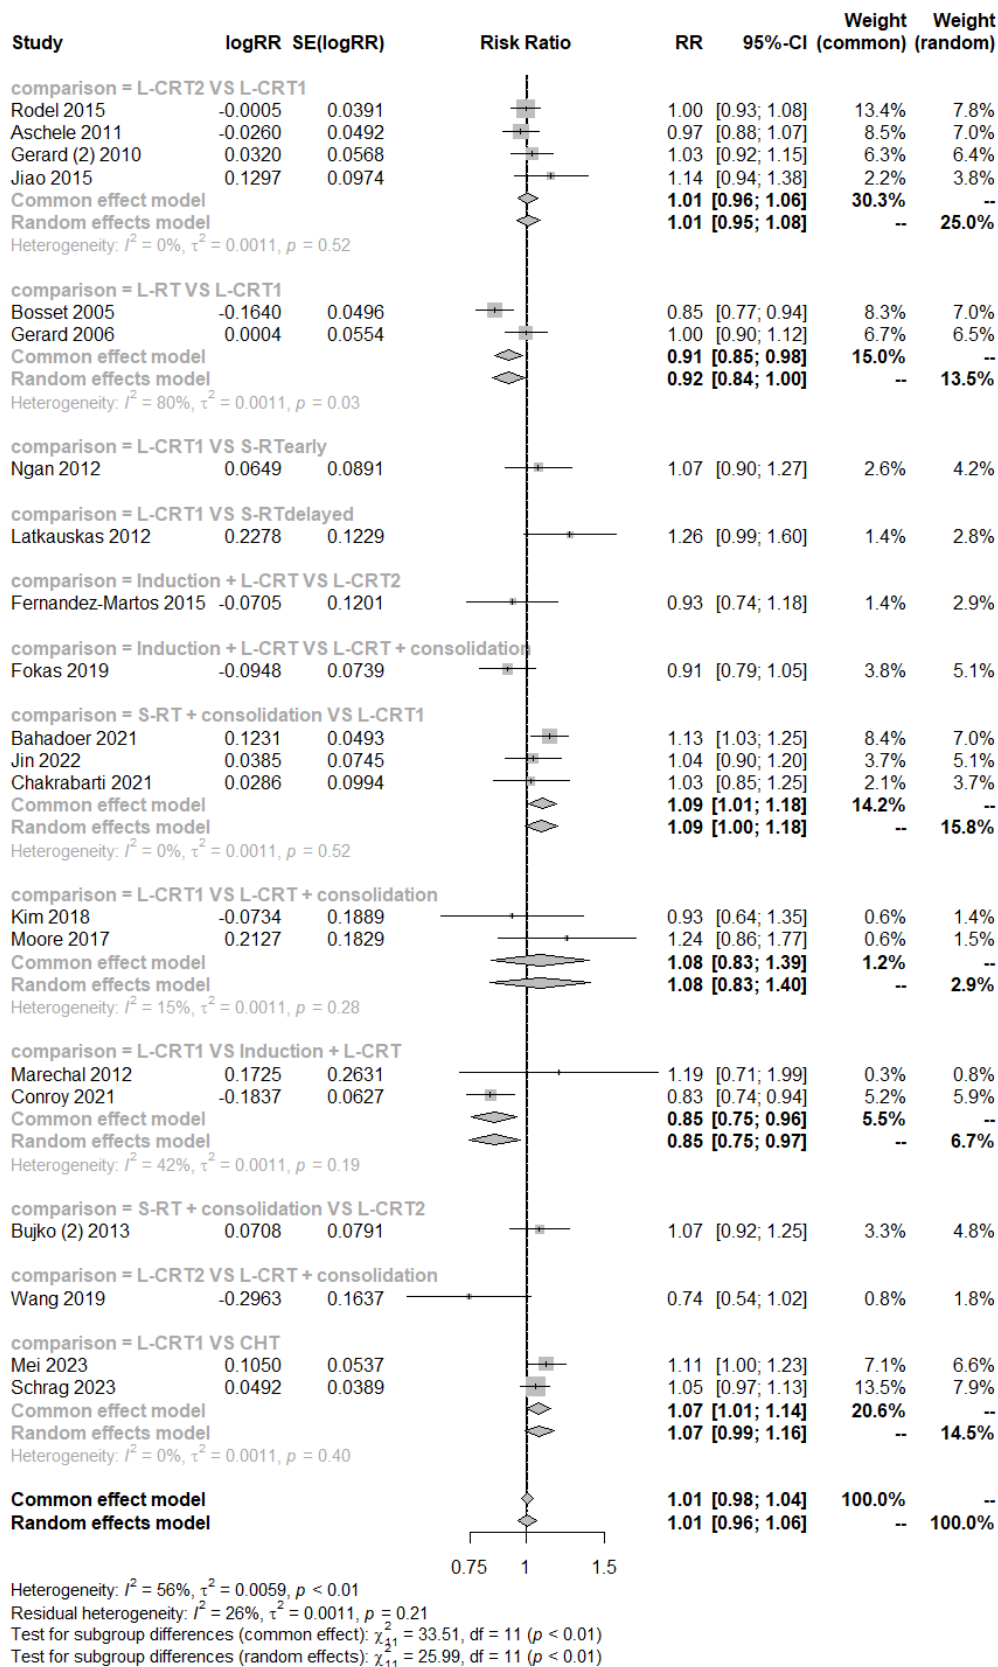

**Network map** The thickness of lines is proportional to the number of studies comparing the two treatments and the size of circles is proportional to the number of individuals for each treatment.

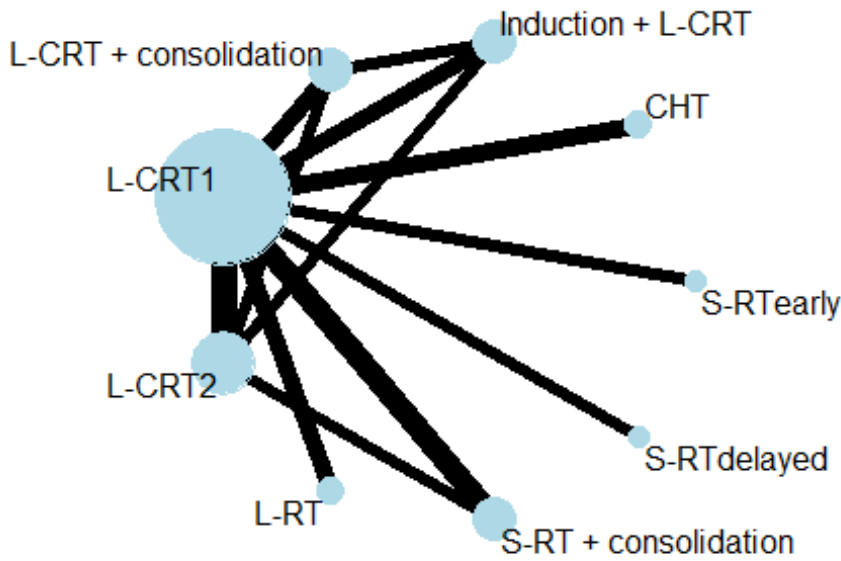

**Netleague table** Relative risks (RRs) and 95% confidence intervals (CIs) are reported. Results of the network meta-analysis are reported in the lower left part of the table and results from the pairwise meta-analysis are reported in the upper right part of the table. RRs higher than 1 favor the column-defining treatment.

|   | V1                  | V2                  | V3                    | V4                  | V5                  | V6                  | V7                   | V8                  | V9                  |
|---|---------------------|---------------------|-----------------------|---------------------|---------------------|---------------------|----------------------|---------------------|---------------------|
| 1 | CHT                 | .                   | .                     | 0.93 (0.85 to 1.02) | .                   | .                   | .                    | .                   | .                   |
| 2 | 0.86 (0.74 to 1.00) | Induction + L-CRT   | 0.91 (0.77 to 1.08)   | 1.17 (1.01 to 1.35) | 0.93 (0.72 to 1.20) | .                   | .                    | .                   | .                   |
| 3 | 0.81 (0.68 to 0.97) | 0.95 (0.82 to 1.09) | L-CRT + consolidation | 0.93 (0.71 to 1.21) | 1.34 (0.96 to 1.88) | .                   | .                    | .                   | .                   |
| 4 | 0.93 (0.85 to 1.02) | 1.08 (0.96 to 1.22) | 1.14 (0.98 to 1.33)   | L-CRT1              | 0.99 (0.92 to 1.06) | 1.09 (0.99 to 1.20) | 0.92 (0.84 to 1.02)  | 1.26 (0.97 to 1.63) | 1.07 (0.88 to 1.30) |
| 5 | 0.91 (0.82 to 1.02) | 1.07 (0.94 to 1.21) | 1.13 (0.96 to 1.31)   | 0.98 (0.92 to 1.05) | L-CRT2              | .                   | 0.93 (0.78 to 1.12)  | .                   | .                   |
| 6 | 1.01 (0.89 to 1.16) | 1.18 (1.01 to 1.38) | 1.25 (1.04 to 1.49)   | 1.09 (0.99 to 1.20) | 1.11 (0.99 to 1.25) | L-RT                | .                    | .                   | .                   |
| 7 | 0.86 (0.76 to 0.97) | 1.00 (0.87 to 1.15) | 1.06 (0.89 to 1.25)   | 0.92 (0.85 to 1.00) | 0.94 (0.85 to 1.03) | 0.85 (0.74 to 0.96) | S-RT + consolidation | .                   | .                   |
| 8 | 1.17 (0.89 to 1.54) | 1.36 (1.02 to 1.81) | 1.44 (1.07 to 1.94)   | 1.26 (0.97 to 1.63) | 1.28 (0.98 to 1.67) | 1.15 (0.87 to 1.52) | 1.36 (1.04 to 1.79)  | S-RTdelayed         | .                   |
| 9 | 0.99 (0.80 to 1.23) | 1.16 (0.92 to 1.45) | 1.22 (0.95 to 1.57)   | 1.07 (0.88 to 1.30) | 1.08 (0.88 to 1.34) | 0.98 (0.78 to 1.22) | 1.16 (0.93 to 1.44)  | 0.85 (0.61 to 1.18) | S-RTearly           |

**Forest plot** L-CRT-1 was used as a common comparator. RRs above 1 favor the strategy over the common comparator (L-CRT1).

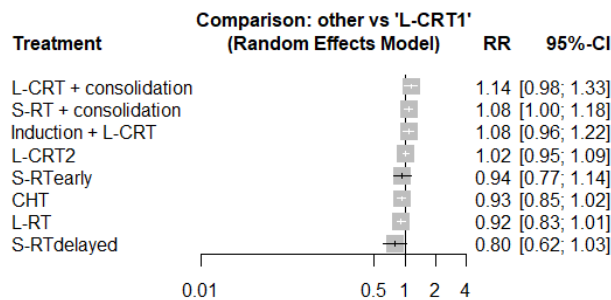

**Assessment of heterogeneity and consistency**

*Global heterogeneity*

We interpreted  $\tau^2$  as follows: heterogeneity low with  $\tau^2 \leq 0.010$ , moderate with  $0.010 < \tau^2 \leq 0.242$ , high with  $\tau^2 > 0.242$ , and  $I^2$  statistics as follows: not important (0%-40%), moderate (30%-60%), substantial (50%-90%), considerable (75%-100%).

$\tau^2 = 0.0023$  ;  $\tau = 0.0475$

$I^2 = 32.23\%$  ( 0 % to 64.22 %)

Consistency: global approach

Q statistic to assess consistency under the assumption of a full design-by-treatment interaction random effects model

Q statistics to assess homogeneity / consistency

|                 | Q     | df | p-value |
|-----------------|-------|----|---------|
| Total           | 19.18 | 13 | 0.1176  |
| Within designs  | 12.09 | 9  | 0.2081  |
| Between designs | 7.09  | 4  | 0.1312  |

Design-specific decomposition of within-designs Q statistic

| Design                       | Q    | df | p-value |
|------------------------------|------|----|---------|
| L-CRT1:CHT                   | 0.71 | 1  | 0.3996  |
| L-CRT1:Induction + L-CRT     | 1.73 | 1  | 0.1878  |
| L-CRT1:L-CRT + consolidation | 1.18 | 1  | 0.2767  |
| L-CRT1:L-CRT2                | 2.26 | 3  | 0.5195  |
| L-CRT1:L-RT                  | 4.90 | 1  | 0.0269  |
| L-CRT1:S-RT + consolidation  | 1.31 | 2  | 0.5204  |

Between-designs Q statistic after detaching of single designs

| Detached design                         | Q    | df | p-value |
|-----------------------------------------|------|----|---------|
| Induction + L-CRT:L-CRT + consolidation | 6.08 | 3  | 0.1076  |
| Induction + L-CRT:L-CRT2                | 5.00 | 3  | 0.1719  |
| L-CRT + consolidation:L-CRT2            | 5.97 | 3  | 0.1130  |
| L-CRT1:Induction + L-CRT                | 3.30 | 3  | 0.3480  |
| L-CRT1:L-CRT + consolidation            | 3.00 | 3  | 0.3915  |
| L-CRT1:L-CRT2                           | 6.92 | 3  | 0.0744  |
| L-CRT1:S-RT + consolidation             | 7.09 | 3  | 0.0692  |
| L-CRT2:S-RT + consolidation             | 7.09 | 3  | 0.0692  |

Q statistic to assess consistency under the assumption of a full design-by-treatment interaction random effects model

|                 | Q    | df | p-value | $\tau$ .within | $\tau^2$ .within |
|-----------------|------|----|---------|----------------|------------------|
| Between designs | 6.19 | 4  | 0.1855  | 0.0369         | 0.0014           |

Consistency: local approach

Separate indirect from direct evidence (SIDE) using back-calculation method

Random effects model:

| comparison                              | k | prop | nma  | direct | indir. | RoR  | z     | p-value |
|-----------------------------------------|---|------|------|--------|--------|------|-------|---------|
| Induction + L-CRT:L-CRT + consolidation | 1 | 0.67 | 0.95 | 0.91   | 1.03   | 0.89 | -0.79 | 0.4280  |
| L-CRT1:Induction + L-CRT                | 2 | 0.62 | 0.92 | 0.86   | 1.05   | 0.82 | -1.63 | 0.1034  |
| Induction + L-CRT:L-CRT2                | 1 | 0.24 | 1.07 | 0.93   | 1.11   | 0.84 | -1.19 | 0.2336  |
| L-CRT1:L-CRT + consolidation            | 2 | 0.32 | 0.87 | 1.08   | 0.79   | 1.36 | 1.87  | 0.0620  |
| L-CRT + consolidation:L-CRT2            | 1 | 0.22 | 1.13 | 1.34   | 1.07   | 1.26 | 1.18  | 0.2373  |
| L-CRT1:L-CRT2                           | 4 | 0.82 | 0.98 | 0.99   | 0.98   | 1.01 | 0.10  | 0.9209  |
| L-CRT1:S-RT + consolidation             | 3 | 0.80 | 0.92 | 0.92   | 0.92   | 1.01 | 0.08  | 0.9337  |
| L-CRT2:S-RT + consolidation             | 1 | 0.30 | 0.94 | 0.93   | 0.94   | 0.99 | -0.08 | 0.9337  |

Legend:

comparison - Treatment comparison  
k - Number of studies providing direct evidence

prop - Direct evidence proportion  
 nma - Estimated treatment effect (RR) in network meta-analysis  
 direct - Estimated treatment effect (RR) derived from direct evidence  
 indir. - Estimated treatment effect (RR) derived from indirect evidence  
 RoR - Ratio of Ratios (direct versus indirect)  
 z - z-value of test for disagreement (direct versus indirect)  
 p-value - p-value of test for disagreement (direct versus indirect)

**Netrank** Higher p-score values indicate higher ranking of treatments

|                       | P-score |
|-----------------------|---------|
| L-CRT + consolidation | 0.9141  |
| S-RT + consolidation  | 0.8155  |
| Induction + L-CRT     | 0.7881  |
| L-CRT2                | 0.5824  |
| L-CRT1                | 0.5085  |
| S-RTearly             | 0.3354  |
| CHT                   | 0.2597  |
| L-RT                  | 0.2247  |
| S-RTdelayed           | 0.0715  |

## eAppendix 15. Rate of post-operative complications Clavien-Dindo III or Greater

### Characteristics of the network

Number of treatments:

6

Number of studies:

9

Number of individuals included:

3525

Number of individuals randomized to each treatment:

| Treatment name          | N. individuals randomized |
|-------------------------|---------------------------|
| 1 Induction + L-CRT     | 356                       |
| 2 L-CRT + consolidation | 212                       |
| 3 L-CRT1                | 1629                      |
| 4 L-CRT2                | 883                       |
| 5 S-RT + consolidation  | 295                       |
| 6 S-RTearly             | 150                       |

### Pairwise meta-analysis

Risk ratios above 1 favor the first treatment of the comparison.

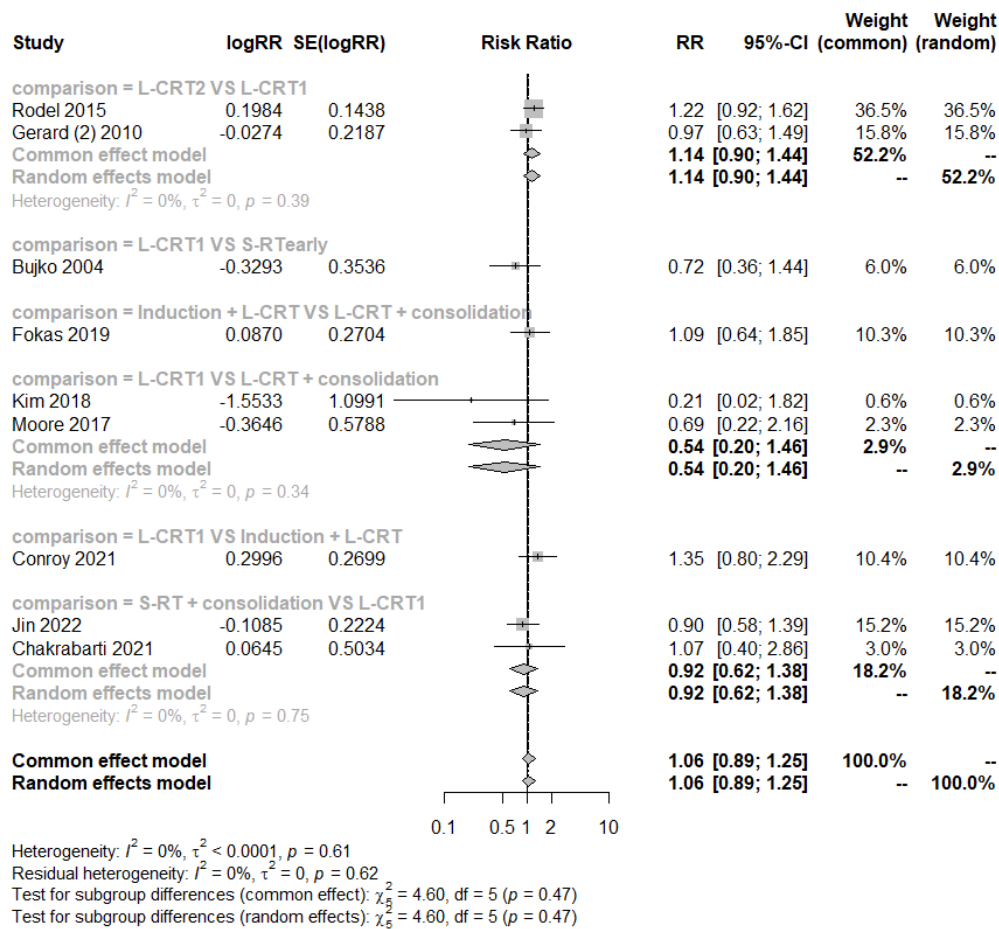

**Network map** The thickness of lines is proportional to the number of studies comparing the two treatments and the size of circles is proportional to the number of individuals for each treatment.

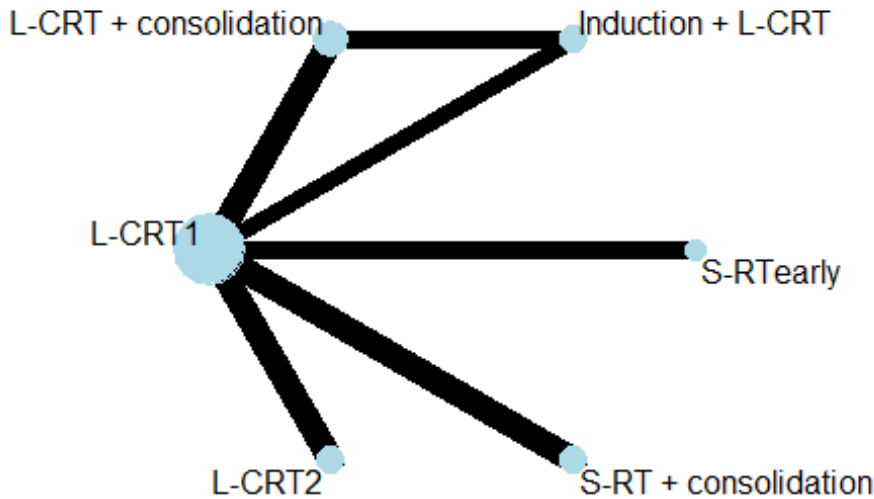

**Netleague table** Relative risks (RRs) and 95% confidence intervals (CIs) are reported. Results of the network meta-analysis are reported in the lower left part of the table and results from the pairwise meta-analysis are reported in the upper right part of the table. RRs higher than 1 favor the column-defining treatment.

|   | V1                  | V2                    | V3                  | V4                  | V5                   | V6                  |
|---|---------------------|-----------------------|---------------------|---------------------|----------------------|---------------------|
| 1 | Induction + L-CRT   | 1.09 (0.63 to 1.89)   | 0.74 (0.43 to 1.28) | .                   | .                    | .                   |
| 2 | 0.90 (0.55 to 1.48) | L-CRT + consolidation | 1.87 (0.68 to 5.14) | .                   | .                    | .                   |
| 3 | 0.89 (0.54 to 1.47) | 0.99 (0.53 to 1.83)   | L-CRT1              | 0.88 (0.68 to 1.15) | 1.08 (0.71 to 1.64)  | 0.72 (0.35 to 1.46) |
| 4 | 0.79 (0.45 to 1.38) | 0.87 (0.45 to 1.71)   | 0.88 (0.68 to 1.15) | L-CRT2              | .                    | .                   |
| 5 | 0.97 (0.51 to 1.85) | 1.07 (0.51 to 2.25)   | 1.08 (0.71 to 1.64) | 1.22 (0.75 to 2.00) | S-RT + consolidation | .                   |
| 6 | 0.64 (0.27 to 1.53) | 0.71 (0.28 to 1.82)   | 0.72 (0.35 to 1.46) | 0.81 (0.38 to 1.73) | 0.67 (0.29 to 1.52)  | S-RTearly           |

**Forest plot** L-CRT-1 was used as a common comparator. RRs above 1 favor the strategy over the common comparator (L-CRT1).

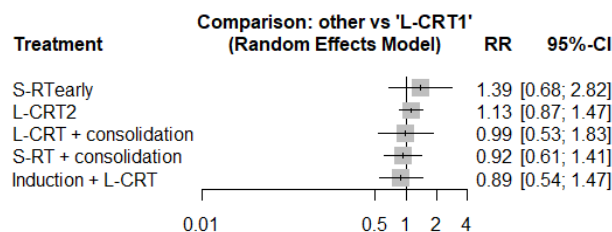

**Assessment of heterogeneity and consistency**

*Global heterogeneity*

We interpreted  $\tau^2$  as follows: heterogeneity low with  $\tau^2 \leq 0.010$ , moderate with  $0.010 < \tau^2 \leq 0.242$ , high with  $\tau^2 > 0.242$ , and  $I^2$  statistics as follows: not important (0%-40%), moderate (30%-60%), substantial (50%-90%), considerable (75%-100%).

$\tau^2 = 0.0058$  ;  $\tau = 0.0764$

$I^2 = 5.98\%$  ( 0 % to 80.45 %)

Consistency: *global approach*

Q statistic to assess consistency under the assumption of a full design-by-treatment interaction random effects model

Q statistics to assess homogeneity / consistency

|                 | Q    | df | p-value |
|-----------------|------|----|---------|
| Total           | 4.25 | 4  | 0.3727  |
| Within designs  | 1.76 | 3  | 0.6239  |
| Between designs | 2.50 | 1  | 0.1142  |

Design-specific decomposition of within-designs Q statistic

| Design                       | Q    | df | p-value |
|------------------------------|------|----|---------|
| L-CRT1:L-CRT + consolidation | 0.92 | 1  | 0.3386  |
| L-CRT1:L-CRT2                | 0.74 | 1  | 0.3882  |
| L-CRT1:S-RT + consolidation  | 0.10 | 1  | 0.7532  |

Between-designs Q statistic after detaching of single designs

| Detached design                         | Q    | df | p-value |
|-----------------------------------------|------|----|---------|
| Induction + L-CRT:L-CRT + consolidation | 0.00 | 0  | --      |
| L-CRT1:Induction + L-CRT                | 0.00 | 0  | --      |
| L-CRT1:L-CRT + consolidation            | 0.00 | 0  | --      |

Q statistic to assess consistency under the assumption of a full design-by-treatment interaction random effects model

|                 | Q    | df | p-value | tau.within | tau2.within |
|-----------------|------|----|---------|------------|-------------|
| Between designs | 2.50 | 1  | 0.1142  | 0          | 0           |

Consistency: *local approach*

Separate indirect from direct evidence (SIDE) using back-calculation method

Random effects model:

| comparison                              | k | prop | nma  | direct | indir. | RoR  | z     | p-value |
|-----------------------------------------|---|------|------|--------|--------|------|-------|---------|
| Induction + L-CRT:L-CRT + consolidation | 1 | 0.81 | 0.90 | 1.09   | 0.40   | 2.75 | 1.55  | 0.1201  |
| L-CRT1:Induction + L-CRT                | 1 | 0.81 | 1.12 | 1.35   | 0.49   | 2.75 | 1.55  | 0.1201  |
| L-CRT1:L-CRT + consolidation            | 2 | 0.37 | 1.01 | 0.54   | 1.47   | 0.36 | -1.55 | 0.1201  |

Legend:

- comparison - Treatment comparison
- k - Number of studies providing direct evidence
- prop - Direct evidence proportion
- nma - Estimated treatment effect (RR) in network meta-analysis
- direct - Estimated treatment effect (RR) derived from direct evidence
- indir. - Estimated treatment effect (RR) derived from indirect evidence
- RoR - Ratio of Ratios (direct versus indirect)
- z - z-value of test for disagreement (direct versus indirect)
- p-value - p-value of test for disagreement (direct versus indirect)

**Netrank** Higher p-score values indicate higher ranking of treatments



|                       | P-score |
|-----------------------|---------|
| S-RTearly             | 0.7915  |
| L-CRT2                | 0.6713  |
| L-CRT + consolidation | 0.4601  |
| L-CRT1                | 0.4368  |
| S-RT + consolidation  | 0.3408  |
| Induction + L-CRT     | 0.2994  |

## eAppendix 16. Rate of anastomotic leak

### Characteristics of the network

Number of treatments:

9

Number of studies:

17

Number of individuals included:

8333

Number of individuals randomized to each treatment:

|   | Treatment name        | N. individuals randomized |
|---|-----------------------|---------------------------|
| 1 | CHT                   | 424                       |
| 2 | Induction + L-CRT     | 294                       |
| 3 | L-CRT + consolidation | 126                       |
| 4 | L-CRT1                | 3752                      |
| 5 | L-CRT2                | 2481                      |
| 6 | L-RT                  | 360                       |
| 7 | S-RT + consolidation  | 670                       |
| 8 | S-RTdelayed           | 68                        |
| 9 | S-RTearly             | 158                       |

### Pairwise meta-analysis

Risk ratios above 1 favor the first treatment of the comparison.

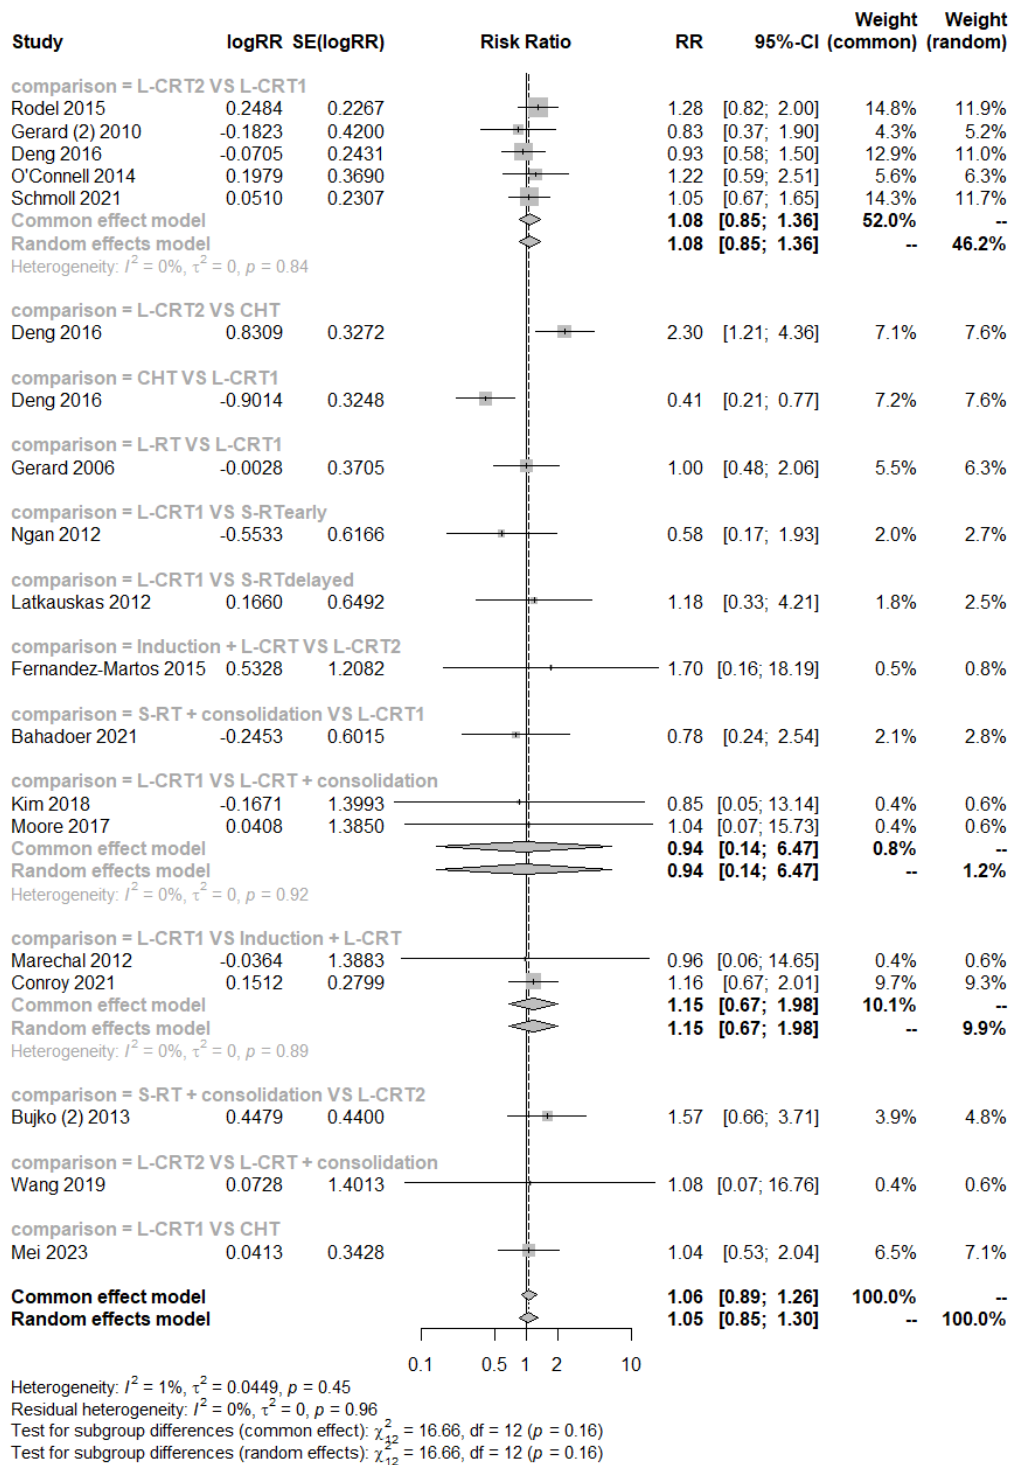

**Network map** The thickness of lines is proportional to the number of studies comparing the two treatments and the size of circles is proportional to the number of individuals for each treatment.

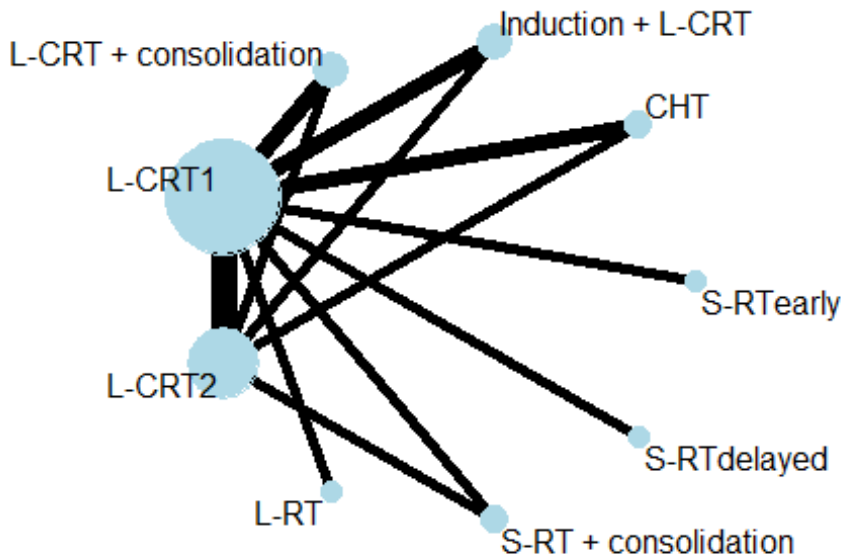

**Netleague table** Relative risks (RRs) and 95% confidence intervals (CIs) are reported. Results of the network meta-analysis are reported in the lower left part of the table and results from the pairwise meta-analysis are reported in the upper right part of the table. RRs higher than 1 favor the column-defining treatment.

|   | V1                  | V2                  | V3                    | V4                  | V5                   | V6                  | V7                   | V8                  | V9                  |
|---|---------------------|---------------------|-----------------------|---------------------|----------------------|---------------------|----------------------|---------------------|---------------------|
| 1 | CHT                 | .                   | .                     | 0.61 (0.38 to 0.97) | 0.44 (0.23 to 0.83)  | .                   | .                    | .                   | .                   |
| 2 | 0.69 (0.34 to 1.36) | Induction + L-CRT   | .                     | 0.87 (0.51 to 1.48) | 1.70 (0.16 to 18.19) | .                   | .                    | .                   | .                   |
| 3 | 0.59 (0.11 to 3.04) | 0.86 (0.16 to 4.55) | L-CRT + consolidation | 1.06 (0.15 to 7.33) | 0.93 (0.06 to 14.49) | .                   | .                    | .                   | .                   |
| 4 | 0.62 (0.39 to 0.96) | 0.90 (0.53 to 1.52) | 1.04 (0.21 to 5.07)   | L-CRT1              | 0.93 (0.73 to 1.18)  | 1.00 (0.49 to 2.07) | 1.28 (0.39 to 4.15)  | 1.18 (0.33 to 4.21) | 0.58 (0.17 to 1.93) |
| 5 | 0.57 (0.36 to 0.92) | 0.83 (0.47 to 1.47) | 0.97 (0.20 to 4.73)   | 0.93 (0.74 to 1.17) | L-CRT2               | .                   | 0.64 (0.27 to 1.51)  | .                   | .                   |
| 6 | 0.62 (0.26 to 1.45) | 0.90 (0.37 to 2.21) | 1.05 (0.18 to 5.95)   | 1.00 (0.49 to 2.07) | 1.08 (0.50 to 2.31)  | L-RT                | .                    | .                   | .                   |
| 7 | 0.48 (0.21 to 1.10) | 0.70 (0.29 to 1.68) | 0.81 (0.14 to 4.55)   | 0.78 (0.38 to 1.58) | 0.83 (0.41 to 1.68)  | 0.77 (0.28 to 2.14) | S-RT + consolidation | .                   | .                   |
| 8 | 0.73 (0.19 to 2.80) | 1.06 (0.27 to 4.20) | 1.23 (0.16 to 9.36)   | 1.18 (0.33 to 4.21) | 1.27 (0.35 to 4.63)  | 1.18 (0.27 to 5.09) | 1.52 (0.35 to 6.54)  | S-RTdelayed         | .                   |
| 9 | 0.35 (0.10 to 1.28) | 0.52 (0.14 to 1.93) | 0.60 (0.08 to 4.38)   | 0.58 (0.17 to 1.93) | 0.62 (0.18 to 2.12)  | 0.57 (0.14 to 2.35) | 0.74 (0.18 to 3.01)  | 0.49 (0.08 to 2.82) | S-RTearly           |

**Forest plot** L-CRT-1 was used as a common comparator. RRs above 1 favor the strategy over the common comparator (L-CRT1).

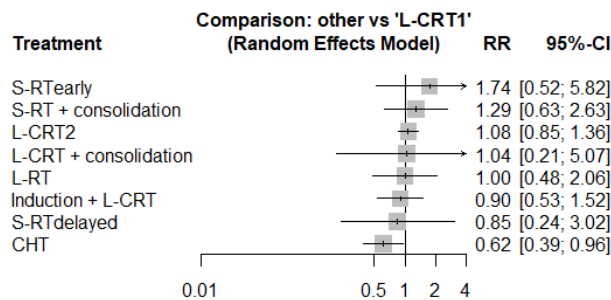

### Assessment of heterogeneity and consistency

#### Global heterogeneity

We interpreted  $\tau^2$  as follows: heterogeneity low with  $\tau^2 \leq 0.010$ , moderate with  $0.010 < \tau^2 \leq 0.242$ , high with  $\tau^2 > 0.242$ , and  $I^2$  statistics as follows: not important (0%-40%), moderate (30%-60%), substantial (50%-90%), considerable (75%-100%).

$\tau^2 = 0$  ;  $\tau = 0$

$I^2 = 0\%$  ( 0 % to 60.23 %)

Consistency: global approach

Q statistic to assess consistency under the assumption of a full design-by-treatment interaction random effects model

Q statistics to assess homogeneity / consistency

|                 | Q    | df | p-value |
|-----------------|------|----|---------|
| Total           | 5.88 | 10 | 0.8251  |
| Within designs  | 1.00 | 5  | 0.9624  |
| Between designs | 4.88 | 5  | 0.4308  |

Design-specific decomposition of within-designs Q statistic

| Design                       | Q    | df | p-value |
|------------------------------|------|----|---------|
| L-CRT1:Induction + L-CRT     | 0.02 | 1  | 0.8947  |
| L-CRT1:L-CRT + consolidation | 0.01 | 1  | 0.9159  |
| L-CRT1:L-CRT2                | 0.97 | 3  | 0.8077  |

Between-designs Q statistic after detaching of single designs

| Detached design              | Q    | df | p-value |
|------------------------------|------|----|---------|
| Induction + L-CRT:L-CRT2     | 4.51 | 4  | 0.3414  |
| L-CRT + consolidation:L-CRT2 | 4.88 | 4  | 0.3000  |
| L-CRT1:CHT                   | 1.85 | 4  | 0.7641  |
| L-CRT1:Induction + L-CRT     | 4.51 | 4  | 0.3414  |
| L-CRT1:L-CRT + consolidation | 4.88 | 4  | 0.3000  |
| L-CRT1:L-CRT2                | 4.48 | 4  | 0.3454  |
| L-CRT1:S-RT + consolidation  | 3.79 | 4  | 0.4346  |
| L-CRT2:S-RT + consolidation  | 3.79 | 4  | 0.4346  |
| L-CRT1:CHT:L-CRT2            | 1.54 | 3  | 0.6739  |

Q statistic to assess consistency under the assumption of a full design-by-treatment interaction random effects model

|                 | Q    | df | p-value | tau.within | tau2.within |
|-----------------|------|----|---------|------------|-------------|
| Between designs | 4.88 | 5  | 0.4308  | 0          | 0           |

Consistency: local approach

Separate indirect from direct evidence (SIDE) using back-calculation method

Random effects model:

| comparison                   | k | prop | nma  | direct | indir. | RoR  | z     | p-value |
|------------------------------|---|------|------|--------|--------|------|-------|---------|
| L-CRT1:CHT                   | 2 | 0.94 | 1.62 | 1.64   | 1.39   | 1.18 | 0.16  | 0.8712  |
| CHT:L-CRT2                   | 1 | 0.55 | 0.57 | 0.44   | 0.80   | 0.55 | -1.24 | 0.2159  |
| L-CRT1:Induction + L-CRT     | 2 | 0.95 | 1.11 | 1.15   | 0.54   | 2.13 | 0.61  | 0.5431  |
| Induction + L-CRT:L-CRT2     | 1 | 0.06 | 0.83 | 1.70   | 0.80   | 2.13 | 0.61  | 0.5431  |
| L-CRT1:L-CRT + consolidation | 2 | 0.67 | 0.96 | 0.94   | 1.00   | 0.94 | -0.04 | 0.9714  |
| L-CRT + consolidation:L-CRT2 | 1 | 0.33 | 0.97 | 0.93   | 0.99   | 0.94 | -0.04 | 0.9714  |
| L-CRT1:L-CRT2                | 5 | 0.95 | 0.93 | 0.93   | 0.93   | 1.00 | -0.00 | 0.9966  |
| L-CRT1:S-RT + consolidation  | 1 | 0.36 | 0.78 | 1.28   | 0.58   | 2.20 | 1.04  | 0.2975  |
| L-CRT2:S-RT + consolidation  | 1 | 0.66 | 0.83 | 0.64   | 1.40   | 0.46 | -1.04 | 0.2975  |

Legend:

comparison - Treatment comparison  
k - Number of studies providing direct evidence  
prop - Direct evidence proportion

nma - Estimated treatment effect (RR) in network meta-analysis  
 direct - Estimated treatment effect (RR) derived from direct evidence  
 indir. - Estimated treatment effect (RR) derived from indirect evidence  
 RoR - Ratio of Ratios (direct versus indirect)  
 z - z-value of test for disagreement (direct versus indirect)  
 p-value - p-value of test for disagreement (direct versus indirect)

**Netrank** Higher p-score values indicate higher ranking of treatments

|                       | P-score |
|-----------------------|---------|
| S-RTearly             | 0.7871  |
| S-RT + consolidation  | 0.6921  |
| L-CRT2                | 0.5900  |
| L-CRT + consolidation | 0.5152  |
| L-RT                  | 0.4965  |
| L-CRT1                | 0.4893  |
| S-RTdelayed           | 0.4042  |
| Induction + L-CRT     | 0.4023  |
| CHT                   | 0.1233  |

## eAppendix 17. Locoregional recurrence at 3 years

### Characteristics of the network

Number of treatments:

7

Number of studies:

11

Number of individuals included:

5749

Number of individuals randomized to each treatment:

|   | Treatment name        | N. individuals randomized |
|---|-----------------------|---------------------------|
| 1 | CHT                   | 165                       |
| 2 | Induction + L-CRT     | 387                       |
| 3 | L-CRT + consolidation | 210                       |
| 4 | L-CRT1                | 2319                      |
| 5 | L-CRT2                | 1486                      |
| 6 | S-RT + consolidation  | 1021                      |
| 7 | S-RTearly             | 161                       |

### Pairwise meta-analysis

Risk ratios above 1 favor the first treatment of the comparison.

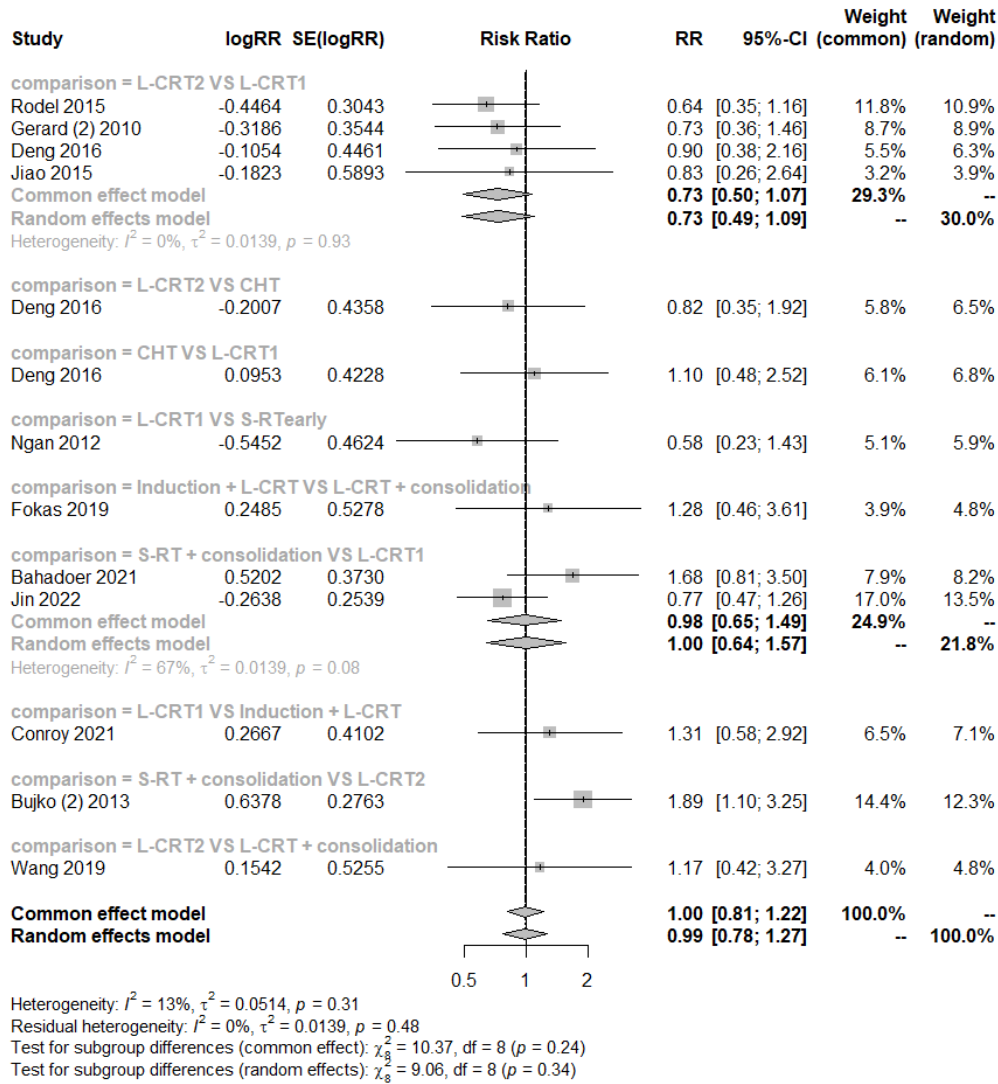

**Network map** The thickness of lines is proportional to the number of studies comparing the two treatments and the size of circles is proportional to the number of individuals for each treatment.



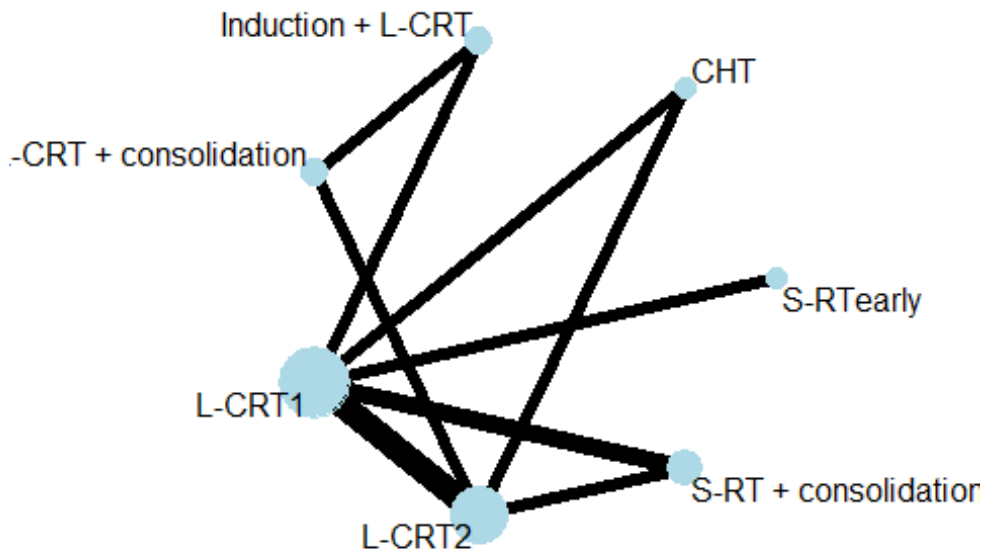

**Netleague table** Relative risks (RRs) and 95% confidence intervals (CIs) are reported. Results of the network meta-analysis are reported in the lower left part of the table and results from the pairwise meta-analysis are reported in the upper right part of the table. RRs higher than 1 favor the column-defining treatment.

|   | V1                  | V2                  | V3                    | V4                  | V5                  | V6                   | V7                  |
|---|---------------------|---------------------|-----------------------|---------------------|---------------------|----------------------|---------------------|
| 1 | CHT                 | .                   | .                     | 1.10 (0.48 to 2.52) | 1.22 (0.52 to 2.87) | .                    | .                   |
| 2 | 1.26 (0.46 to 3.46) | Induction + L-CRT   | 1.28 (0.46 to 3.61)   | 0.77 (0.34 to 1.71) | .                   | .                    | .                   |
| 3 | 1.64 (0.55 to 4.85) | 1.30 (0.57 to 2.95) | L-CRT + consolidation | .                   | 0.86 (0.31 to 2.40) | .                    | .                   |
| 4 | 0.96 (0.46 to 2.00) | 0.76 (0.37 to 1.54) | 0.59 (0.25 to 1.35)   | L-CRT1              | 1.37 (0.94 to 2.00) | 1.02 (0.67 to 1.53)  | 0.58 (0.23 to 1.43) |
| 5 | 1.42 (0.68 to 2.98) | 1.13 (0.53 to 2.38) | 0.87 (0.38 to 1.97)   | 1.48 (1.07 to 2.05) | L-CRT2              | 0.53 (0.31 to 0.91)  | .                   |
| 6 | 0.89 (0.40 to 1.95) | 0.70 (0.32 to 1.53) | 0.54 (0.22 to 1.30)   | 0.92 (0.65 to 1.31) | 0.62 (0.42 to 0.92) | S-RT + consolidation | .                   |
| 7 | 0.56 (0.17 to 1.79) | 0.44 (0.14 to 1.39) | 0.34 (0.10 to 1.16)   | 0.58 (0.23 to 1.43) | 0.39 (0.15 to 1.02) | 0.63 (0.24 to 1.66)  | S-RTearly           |

**Forest plot** L-CRT-1 was used as a common comparator. RRs above 1 favor the strategy over the common comparator (L-CRT1).

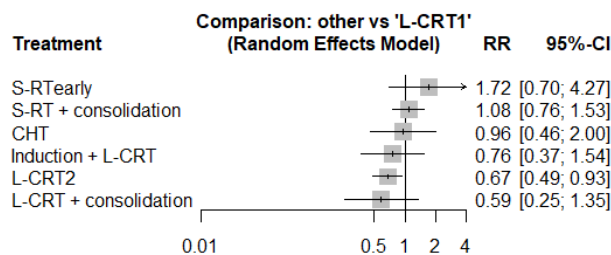

### Assessment of heterogeneity and consistency

#### Global heterogeneity

We interpreted  $\tau^2$  as follows: heterogeneity low with  $\tau^2 \leq 0.010$ , moderate with  $0.010 < \tau^2 \leq 0.242$ , high with  $\tau^2 > 0.242$ , and  $I^2$  statistics as follows: not important (0%-40%), moderate (30%-60%), substantial (50%-90%), considerable (75%-100%).

$\tau^2 = 0$  ;  $\tau = 0$

$I^2 = 0\%$  ( 0 % to 70.81 %)

Consistency: global approach

Q statistic to assess consistency under the assumption of a full design-by-treatment interaction random effects model

Q statistics to assess homogeneity / consistency

|                 | Q    | df | p-value |
|-----------------|------|----|---------|
| Total           | 4.20 | 6  | 0.6495  |
| Within designs  | 3.20 | 3  | 0.3613  |
| Between designs | 1.00 | 3  | 0.8018  |

Design-specific decomposition of within-designs Q statistic

| Design                      | Q    | df | p-value |
|-----------------------------|------|----|---------|
| L-CRT1:L-CRT2               | 0.18 | 2  | 0.9117  |
| L-CRT1:S-RT + consolidation | 3.02 | 1  | 0.0823  |

Between-designs Q statistic after detaching of single designs

| Detached design                         | Q    | df | p-value |
|-----------------------------------------|------|----|---------|
| Induction + L-CRT:L-CRT + consolidation | 1.00 | 2  | 0.6077  |
| L-CRT + consolidation:L-CRT2            | 1.00 | 2  | 0.6077  |
| L-CRT1:Induction + L-CRT                | 1.00 | 2  | 0.6077  |
| L-CRT1:L-CRT2                           | 0.95 | 2  | 0.6221  |
| L-CRT1:S-RT + consolidation             | 0.28 | 2  | 0.8711  |
| L-CRT2:S-RT + consolidation             | 0.28 | 2  | 0.8711  |

Q statistic to assess consistency under the assumption of a full design-by-treatment interaction random effects model

|                 | Q    | df | p-value | $\tau$ .within | $\tau^2$ .within |
|-----------------|------|----|---------|----------------|------------------|
| Between designs | 0.88 | 3  | 0.8308  | 0.0945         | 0.0089           |

Consistency: local approach

Separate indirect from direct evidence (SIDE) using back-calculation method

Random effects model:

| comparison                              | k | prop | nma  | direct | indir. | RoR  | z     | p-value |
|-----------------------------------------|---|------|------|--------|--------|------|-------|---------|
| L-CRT1:CHT                              | 1 | 0.79 | 1.04 | 0.91   | 1.72   | 0.53 | -0.70 | 0.4852  |
| CHT:L-CRT2                              | 1 | 0.75 | 1.42 | 1.22   | 2.24   | 0.55 | -0.70 | 0.4852  |
| Induction + L-CRT:L-CRT + consolidation | 1 | 0.63 | 1.30 | 1.28   | 1.33   | 0.97 | -0.04 | 0.9681  |
| L-CRT1:Induction + L-CRT                | 1 | 0.78 | 1.32 | 1.31   | 1.35   | 0.97 | -0.04 | 0.9681  |
| L-CRT + consolidation:L-CRT2            | 1 | 0.63 | 0.87 | 0.86   | 0.89   | 0.97 | -0.04 | 0.9681  |
| L-CRT1:L-CRT2                           | 4 | 0.73 | 1.48 | 1.37   | 1.84   | 0.74 | -0.79 | 0.4299  |
| L-CRT1:S-RT + consolidation             | 2 | 0.72 | 0.92 | 1.02   | 0.73   | 1.40 | 0.85  | 0.3956  |
| L-CRT2:S-RT + consolidation             | 1 | 0.51 | 0.62 | 0.53   | 0.74   | 0.71 | -0.85 | 0.3956  |

Legend:

- comparison - Treatment comparison
- k - Number of studies providing direct evidence
- prop - Direct evidence proportion
- nma - Estimated treatment effect (RR) in network meta-analysis
- direct - Estimated treatment effect (RR) derived from direct evidence
- indir. - Estimated treatment effect (RR) derived from indirect evidence
- RoR - Ratio of Ratios (direct versus indirect)

z - z-value of test for disagreement (direct versus indirect)  
p-value - p-value of test for disagreement (direct versus indirect)

**Netrank** Higher p-score values indicate higher ranking of treatments

|                       | P-score |
|-----------------------|---------|
| S-RTearly             | 0.8989  |
| S-RT + consolidation  | 0.6972  |
| L-CRT1                | 0.6090  |
| CHT                   | 0.5527  |
| Induction + L-CRT     | 0.3623  |
| L-CRT2                | 0.2047  |
| L-CRT + consolidation | 0.1751  |

## eAppendix 18. Locoregional recurrence at 5 years

### Characteristics of the network

Number of treatments:

7

Number of studies:

7

Number of individuals included:

4886

Number of individuals randomized to each treatment:

| Treatment name         | N. individuals randomized |
|------------------------|---------------------------|
| 1 CHT                  | 585                       |
| 2 Induction + L-CRT    | 54                        |
| 3 L-CRT1               | 2370                      |
| 4 L-CRT2               | 887                       |
| 5 L-RT                 | 367                       |
| 6 S-RT + consolidation | 462                       |
| 7 S-RTearly            | 161                       |

### Pairwise meta-analysis

Risk ratios above 1 favor the first treatment of the comparison.

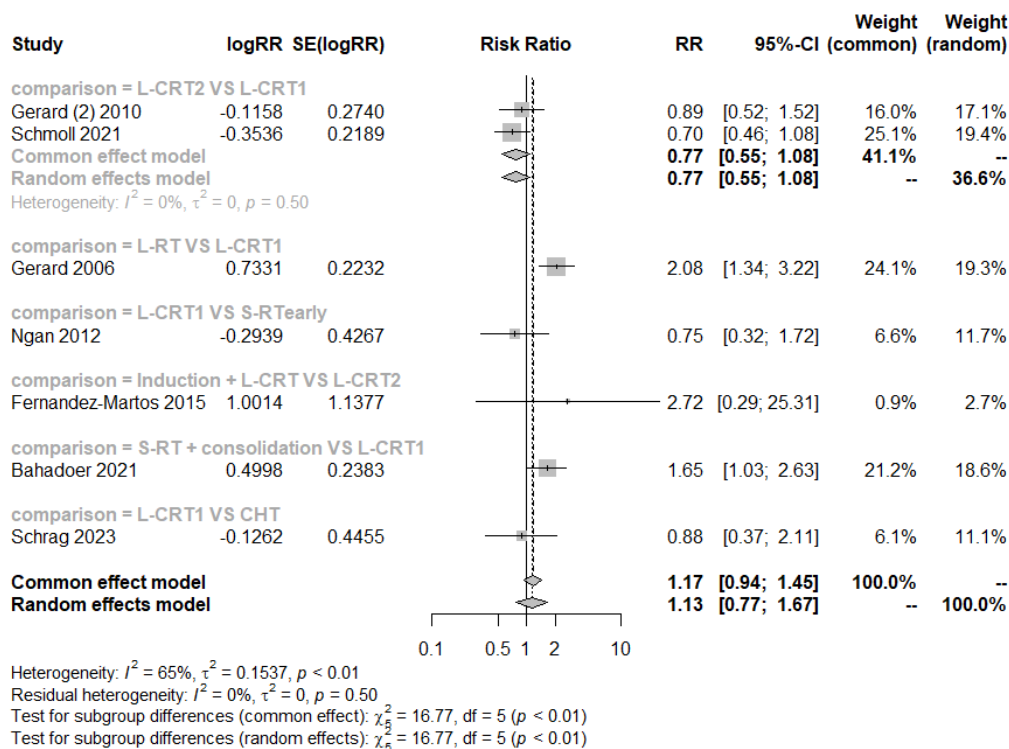

**Network map** The thickness of lines is proportional to the number of studies comparing the two treatments and the size of circles is proportional to the number of individuals for each treatment.

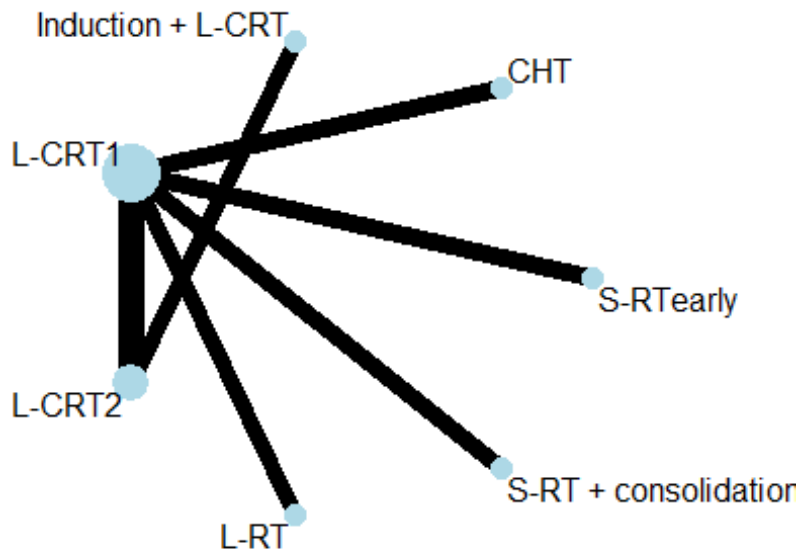

**Netleague table** Relative risks (RRs) and 95% confidence intervals (CIs) are reported. Results of the network meta-analysis are reported in the lower left part of the table and results from the pairwise meta-analysis are reported in the upper right part of the table. RRs higher than 1 favor the column-defining treatment.

|   | V1                  | V2                   | V3                  | V4                   | V5                  | V6                   | V7                  |
|---|---------------------|----------------------|---------------------|----------------------|---------------------|----------------------|---------------------|
| 1 | CHT                 | .                    | 1.13 (0.47 to 2.72) | .                    | .                   | .                    | .                   |
| 2 | 0.54 (0.05 to 6.07) | Induction + L-CRT    | .                   | 2.72 (0.29 to 25.31) | .                   | .                    | .                   |
| 3 | 1.13 (0.47 to 2.72) | 2.10 (0.22 to 19.99) | L-CRT1              | 1.30 (0.93 to 1.82)  | 0.48 (0.31 to 0.74) | 0.61 (0.38 to 0.97)  | 0.75 (0.32 to 1.72) |
| 4 | 1.47 (0.58 to 3.75) | 2.72 (0.29 to 25.31) | 1.30 (0.93 to 1.82) | L-CRT2               | .                   | .                    | .                   |
| 5 | 0.55 (0.21 to 1.45) | 1.01 (0.10 to 10.02) | 0.48 (0.31 to 0.74) | 0.37 (0.21 to 0.64)  | L-RT                | .                    | .                   |
| 6 | 0.69 (0.26 to 1.85) | 1.27 (0.13 to 12.72) | 0.61 (0.38 to 0.97) | 0.47 (0.26 to 0.83)  | 1.26 (0.67 to 2.39) | S-RT + consolidation | .                   |
| 7 | 0.85 (0.25 to 2.83) | 1.56 (0.14 to 17.32) | 0.75 (0.32 to 1.72) | 0.57 (0.23 to 1.41)  | 1.55 (0.60 to 3.99) | 1.23 (0.47 to 3.20)  | S-RTearly           |

**Forest plot** L-CRT-1 was used as a common comparator. RRs above 1 favor the strategy over the common comparator (L-CRT1).

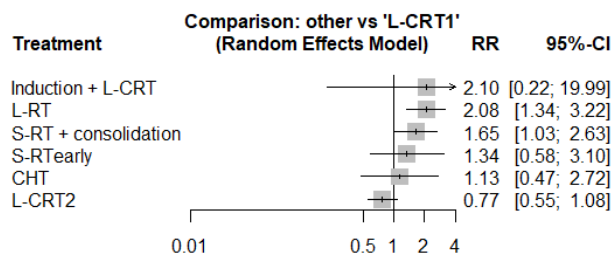

### Assessment of heterogeneity and consistency

#### Global heterogeneity

We interpreted  $\tau^2$  as follows: heterogeneity low with  $\tau^2 \leq 0.010$ , moderate with  $0.010 < \tau^2 \leq 0.242$ , high with  $\tau^2 > 0.242$ , and  $I^2$  statistics as follows: not important (0%-40%), moderate (30%-60%), substantial (50%-90%), considerable (75%-100%).

$\tau^2 = 0$  ;  $\tau = 0$

$I^2 = 0\%$  ( NA % to NA %)

Consistency: global approach

Q statistic to assess consistency under the assumption of a full design-by-treatment interaction random effects model

Q statistics to assess homogeneity / consistency

|                 | Q    | df | p-value |
|-----------------|------|----|---------|
| Total           | 0.46 | 1  | 0.4976  |
| Within designs  | 0.46 | 1  | 0.4976  |
| Between designs | 0.00 | 0  | --      |

Design-specific decomposition of within-designs Q statistic

| Design        | Q    | df | p-value |
|---------------|------|----|---------|
| L-CRT1:L-CRT2 | 0.46 | 1  | 0.4976  |

Q statistic to assess consistency under the assumption of a full design-by-treatment interaction random effects model

|                 | Q    | df | p-value | $\tau^2$ .within | $\tau^2$ .within |
|-----------------|------|----|---------|------------------|------------------|
| Between designs | 0.00 | 0  | --      | 0                | 0                |

Consistency: local approach

Separate indirect from direct evidence (SIDE) using back-calculation method

Random effects model:

comparison k nma direct indir. RoR z p-value

Legend:

comparison - Treatment comparison  
k - Number of studies providing direct evidence  
nma - Estimated treatment effect (RR) in network meta-analysis  
direct - Estimated treatment effect (RR) derived from direct evidence  
indir. - Estimated treatment effect (RR) derived from indirect evidence  
RoR - Ratio of Ratios (direct versus indirect)  
z - z-value of test for disagreement (direct versus indirect)  
p-value - p-value of test for disagreement (direct versus indirect)

**Netrank** Higher p-score values indicate higher ranking of treatments

|                      | P-score |
|----------------------|---------|
| L-RT                 | 0.8278  |
| S-RT + consolidation | 0.6778  |
| Induction + L-CRT    | 0.6612  |
| S-RTearly            | 0.5206  |
| CHT                  | 0.4077  |
| L-CRT1               | 0.3081  |
| L-CRT2               | 0.0967  |

## eAppendix 19. Locoregional failure at 3 years

### Characteristics of the network

Number of treatments:

7

Number of studies:

10

Number of individuals included:

5234

Number of individuals randomized to each treatment:

|   | Treatment name        | N. individuals randomized |
|---|-----------------------|---------------------------|
| 1 | CHT                   | 165                       |
| 2 | Induction + L-CRT     | 387                       |
| 3 | L-CRT + consolidation | 210                       |
| 4 | L-CRT1                | 2319                      |
| 5 | L-CRT2                | 1232                      |
| 6 | S-RT + consolidation  | 760                       |
| 7 | S-RTearly             | 161                       |

### Pairwise meta-analysis

Risk ratios above 1 favor the first treatment of the comparison.

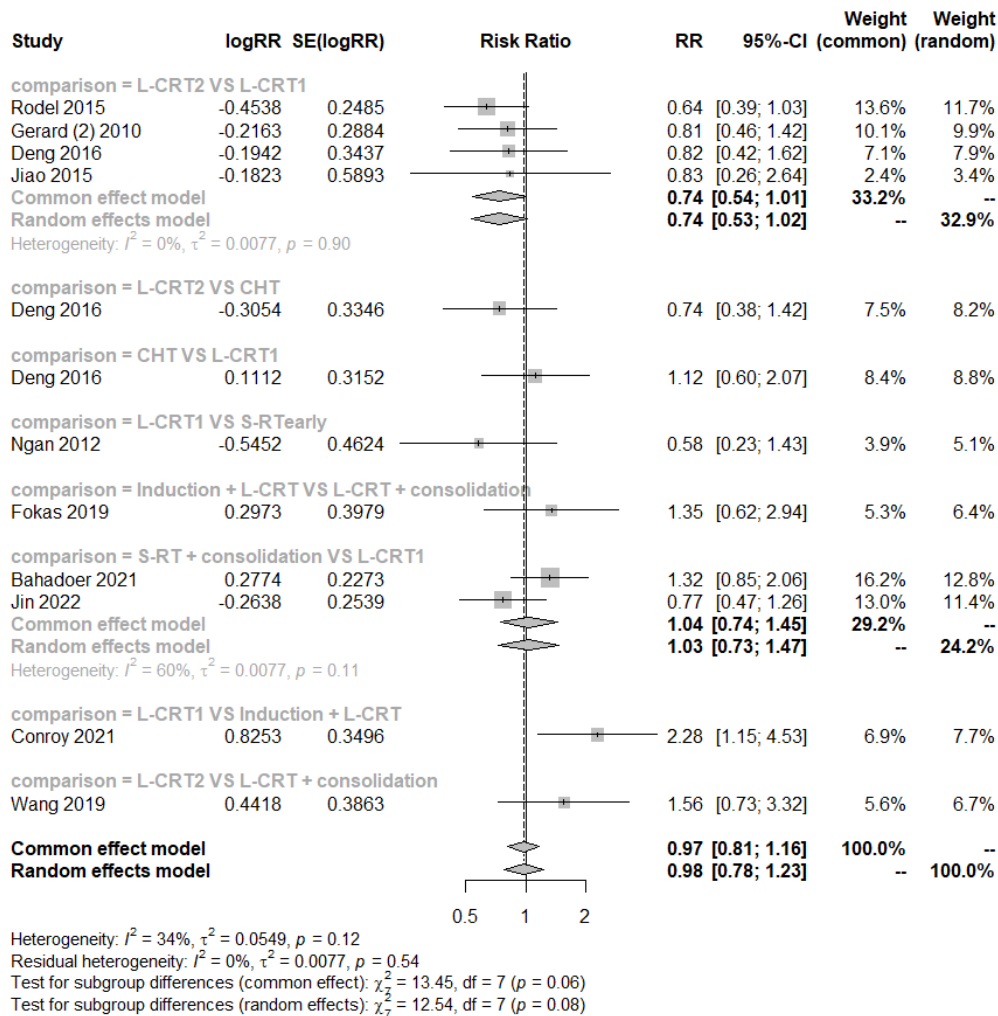

**Network map** The thickness of lines is proportional to the number of studies comparing the two treatments and the size of circles is proportional to the number of individuals for each treatment.



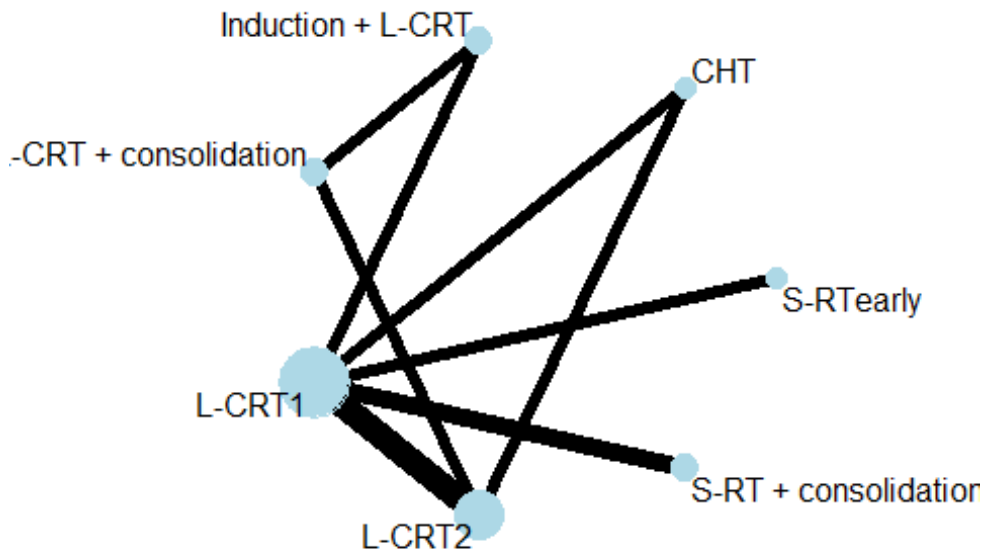

**Netleague table** Relative risks (RRs) and 95% confidence intervals (CIs) are reported. Results of the network meta-analysis are reported in the lower left part of the table and results from the pairwise meta-analysis are reported in the upper right part of the table. RRs higher than 1 favor the column-defining treatment.

|   | V1                  | V2                  | V3                    | V4                  | V5                  | V6                   | V7                  |
|---|---------------------|---------------------|-----------------------|---------------------|---------------------|----------------------|---------------------|
| 1 | CHT                 | .                   | .                     | 1.12 (0.60 to 2.07) | 1.36 (0.70 to 2.61) | .                    | .                   |
| 2 | 2.17 (0.98 to 4.81) | Induction + L-CRT   | 1.35 (0.62 to 2.94)   | 0.44 (0.22 to 0.87) | .                   | .                    | .                   |
| 3 | 2.57 (1.13 to 5.82) | 1.18 (0.63 to 2.22) | L-CRT + consolidation | .                   | 0.64 (0.30 to 1.37) | .                    | .                   |
| 4 | 1.05 (0.60 to 1.84) | 0.48 (0.27 to 0.87) | 0.41 (0.22 to 0.78)   | L-CRT1              | 1.36 (0.99 to 1.86) | 0.96 (0.69 to 1.34)  | 0.58 (0.23 to 1.43) |
| 5 | 1.46 (0.83 to 2.57) | 0.67 (0.36 to 1.25) | 0.57 (0.31 to 1.06)   | 1.39 (1.02 to 1.88) | L-CRT2              | .                    | .                   |
| 6 | 1.02 (0.53 to 1.94) | 0.47 (0.24 to 0.92) | 0.40 (0.19 to 0.81)   | 0.96 (0.69 to 1.34) | 0.70 (0.44 to 1.09) | S-RT + consolidation | .                   |
| 7 | 0.61 (0.21 to 1.77) | 0.28 (0.10 to 0.83) | 0.24 (0.08 to 0.72)   | 0.58 (0.23 to 1.43) | 0.42 (0.16 to 1.09) | 0.60 (0.23 to 1.58)  | S-RTearly           |

**Forest plot** L-CRT-1 was used as a common comparator. RRs above 1 favor the strategy over the common comparator (L-CRT1).

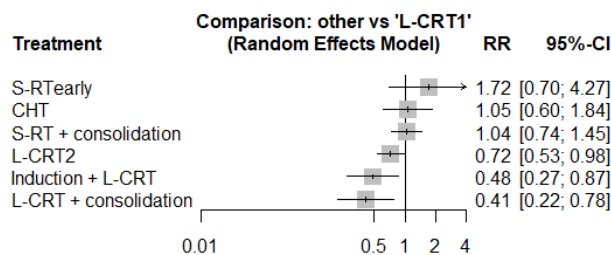

**Assessment of heterogeneity and consistency**

*Global heterogeneity*

We interpreted  $\tau^2$  as follows: heterogeneity low with  $\tau^2 \leq 0.010$ , moderate with  $0.010 < \tau^2 \leq 0.242$ , high with  $\tau^2 > 0.242$ , and  $I^2$  statistics as follows: not important (0%-40%), moderate (30%-60%), substantial (50%-90%), considerable (75%-100%).

$\tau^2 = 0$  ;  $\tau = 0$

$I^2 = 0\%$  ( 0 % to 74.62 %)

Consistency: *global approach*

Q statistic to assess consistency under the assumption of a full design-by-treatment interaction random effects model

Q statistics to assess homogeneity / consistency

|                 | Q    | df | p-value |
|-----------------|------|----|---------|
| Total           | 3.43 | 5  | 0.6341  |
| Within designs  | 2.99 | 3  | 0.3938  |
| Between designs | 0.44 | 2  | 0.8011  |

Design-specific decomposition of within-designs Q statistic

| Design                      | Q    | df | p-value |
|-----------------------------|------|----|---------|
| L-CRT1:L-CRT2               | 0.47 | 2  | 0.7925  |
| L-CRT1:S-RT + consolidation | 2.52 | 1  | 0.1123  |

Between-designs Q statistic after detaching of single designs

| Detached design                         | Q    | df | p-value |
|-----------------------------------------|------|----|---------|
| Induction + L-CRT:L-CRT + consolidation | 0.14 | 1  | 0.7129  |
| L-CRT + consolidation:L-CRT2            | 0.14 | 1  | 0.7129  |
| L-CRT1:Induction + L-CRT                | 0.14 | 1  | 0.7129  |
| L-CRT1:L-CRT2                           | 0.43 | 1  | 0.5110  |

Q statistic to assess consistency under the assumption of a full design-by-treatment interaction random effects model

|                 | Q    | df | p-value | $\tau$ .within | $\tau^2$ .within |
|-----------------|------|----|---------|----------------|------------------|
| Between designs | 0.44 | 2  | 0.8011  | 0              | 0                |

Consistency: *local approach*

Separate indirect from direct evidence (SIDE) using back-calculation method

Random effects model:

| comparison                              | k | prop | nma  | direct | indir. | RoR  | z     | p-value |
|-----------------------------------------|---|------|------|--------|--------|------|-------|---------|
| L-CRT1:CHT                              | 1 | 0.81 | 0.95 | 0.89   | 1.22   | 0.73 | -0.43 | 0.6650  |
| CHT:L-CRT2                              | 1 | 0.74 | 1.46 | 1.36   | 1.81   | 0.75 | -0.43 | 0.6650  |
| Induction + L-CRT:L-CRT + consolidation | 1 | 0.65 | 1.18 | 1.35   | 0.93   | 1.45 | 0.56  | 0.5788  |
| L-CRT1:Induction + L-CRT                | 1 | 0.73 | 2.06 | 2.28   | 1.57   | 1.45 | 0.56  | 0.5788  |
| L-CRT + consolidation:L-CRT2            | 1 | 0.67 | 0.57 | 0.64   | 0.44   | 1.45 | 0.56  | 0.5788  |
| L-CRT1:L-CRT2                           | 4 | 0.94 | 1.39 | 1.36   | 1.98   | 0.69 | -0.56 | 0.5788  |

Legend:

- comparison - Treatment comparison
- k - Number of studies providing direct evidence
- prop - Direct evidence proportion
- nma - Estimated treatment effect (RR) in network meta-analysis
- direct - Estimated treatment effect (RR) derived from direct evidence
- indir. - Estimated treatment effect (RR) derived from indirect evidence
- RoR - Ratio of Ratios (direct versus indirect)
- z - z-value of test for disagreement (direct versus indirect)
- p-value - p-value of test for disagreement (direct versus indirect)

**Netrank** Higher p-score values indicate higher ranking of treatments

|                       | P-score |
|-----------------------|---------|
| S-RTearly             | 0.9159  |
| S-RT + consolidation  | 0.6904  |
| CHT                   | 0.6898  |
| L-CRT1                | 0.6555  |
| L-CRT2                | 0.3439  |
| Induction + L-CRT     | 0.1436  |
| L-CRT + consolidation | 0.0610  |

## eAppendix 20. Locoregional failure at 5 years

### Characteristics of the network

Number of treatments:

7

Number of studies:

6

Number of individuals included:

3792

Number of individuals randomized to each treatment:

| Treatment name         | N. individuals randomized |
|------------------------|---------------------------|
| 1 CHT                  | 585                       |
| 2 Induction + L-CRT    | 54                        |
| 3 L-CRT1               | 1823                      |
| 4 L-CRT2               | 340                       |
| 5 L-RT                 | 367                       |
| 6 S-RT + consolidation | 462                       |
| 7 S-RTearly            | 161                       |

### Pairwise meta-analysis

Risk ratios above 1 favor the first treatment of the comparison.

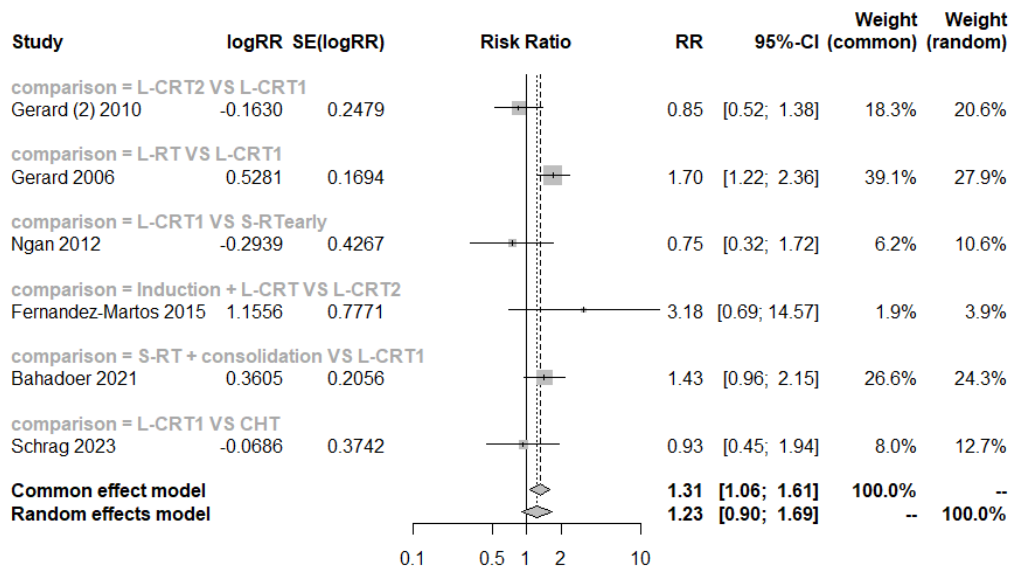

Heterogeneity:  $I^2 = 47\%$ ,  $\tau^2 = 0.0648$ ,  $p = 0.09$

Residual heterogeneity:  $I^2 = \text{NA}\%$ ,  $\tau^2 = 0$ ,  $p = \text{NA}$

Test for subgroup differences (common effect):  $\chi^2_5 = 9.43$ ,  $df = 5$  ( $p = 0.09$ )

Test for subgroup differences (random effects):  $\chi^2_5 = 9.43$ ,  $df = 5$  ( $p = 0.09$ )

**Network map** The thickness of lines is proportional to the number of studies comparing the two treatments and the size of circles is proportional to the number of individuals for each treatment.

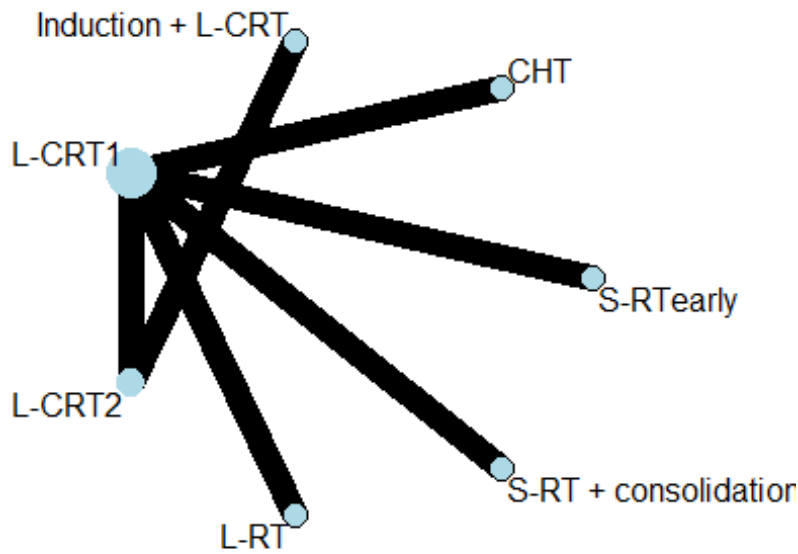

**Netleague table** Relative risks (RRs) and 95% confidence intervals (Cis) are reported. Results of the network meta-analysis are reported in the lower left part of the table and results from the pairwise meta-analysis are reported in the upper right part of the table. RRs higher than 1 favor the column-defining treatment.

|   | V1                  | V2                   | V3                  | V4                   | V5                  | V6                   | V7                  |
|---|---------------------|----------------------|---------------------|----------------------|---------------------|----------------------|---------------------|
| 1 | CHT                 | .                    | 1.07 (0.51 to 2.23) | .                    | .                   | .                    | .                   |
| 2 | 0.40 (0.07 to 2.30) | Induction + L-CRT    | .                   | 3.18 (0.69 to 14.57) | .                   | .                    | .                   |
| 3 | 1.07 (0.51 to 2.23) | 2.70 (0.55 to 13.35) | L-CRT1              | 1.18 (0.72 to 1.91)  | 0.59 (0.42 to 0.82) | 0.70 (0.47 to 1.04)  | 0.75 (0.32 to 1.72) |
| 4 | 1.26 (0.52 to 3.04) | 3.18 (0.69 to 14.57) | 1.18 (0.72 to 1.91) | L-CRT2               | .                   | .                    | .                   |
| 5 | 0.63 (0.28 to 1.41) | 1.59 (0.31 to 8.14)  | 0.59 (0.42 to 0.82) | 0.50 (0.28 to 0.90)  | L-RT                | .                    | .                   |
| 6 | 0.75 (0.32 to 1.72) | 1.88 (0.36 to 9.78)  | 0.70 (0.47 to 1.04) | 0.59 (0.32 to 1.11)  | 1.18 (0.70 to 1.99) | S-RT + consolidation | .                   |
| 7 | 0.80 (0.26 to 2.43) | 2.01 (0.33 to 12.22) | 0.75 (0.32 to 1.72) | 0.63 (0.24 to 1.67)  | 1.26 (0.51 to 3.11) | 1.07 (0.42 to 2.70)  | S-RTearly           |

**Forest plot** L-CRT-1 was used as a common comparator. RRs above 1 favor the strategy over the common comparator (L-CRT1).

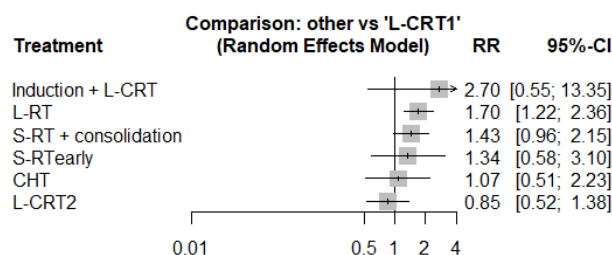

### Assessment of heterogeneity and consistency

#### Global heterogeneity

We interpreted  $\tau^2$  as follows: heterogeneity low with  $\tau^2 \leq 0.010$ , moderate with  $0.010 < \tau^2 \leq 0.242$ , high with  $\tau^2 > 0.242$ , and  $I^2$  statistics as follows: not important (0%-40%), moderate (30%-60%), substantial (50%-90%), considerable (75%-100%).

Tau<sup>2</sup>= NA ; tau= NA

I<sup>2</sup>= NA % ( NA % to NA %)

Consistency: global approach

Q statistic to assess consistency under the assumption of a full design-by-treatment interaction random effects model

Q statistics to assess homogeneity / consistency

|                 | Q    | df | p-value |
|-----------------|------|----|---------|
| Total           | 0.00 | 0  | --      |
| Within designs  | 0.00 | 0  | --      |
| Between designs | 0.00 | 0  | --      |

Q statistic to assess consistency under the assumption of a full design-by-treatment interaction random effects model

|                 | Q    | df | p-value | tau.within | tau2.within |
|-----------------|------|----|---------|------------|-------------|
| Between designs | 0.00 | 0  | --      | 0          | 0           |

Consistency: local approach

Separate indirect from direct evidence (SIDE) using back-calculation method

Random effects model:

comparison k nma direct indir. RoR z p-value

Legend:

- comparison – Treatment comparison
- k – Number of studies providing direct evidence
- nma – Estimated treatment effect (RR) in network meta-analysis
- direct – Estimated treatment effect (RR) derived from direct evidence
- indir. – Estimated treatment effect (RR) derived from indirect evidence
- RoR – Ratio of Ratios (direct versus indirect)
- z – z-value of test for disagreement (direct versus indirect)
- p-value – p-value of test for disagreement (direct versus indirect)

**Netrank** Higher p-score values indicate higher ranking of treatments

|                      | P-score |
|----------------------|---------|
| Induction + L-CRT    | 0.8215  |
| L-RT                 | 0.7627  |
| S-RT + consolidation | 0.6180  |
| S-Rtearly            | 0.5341  |
| CHT                  | 0.3577  |
| L-CRT1               | 0.2617  |
| L-CRT2               | 0.1444  |

## eAppendix 21. Distant recurrence rate at 3 years

### Characteristics of the network

Number of treatments:

5

Number of studies:

8

Number of individuals included:

4811

Number of individuals randomized to each treatment:

| Treatment name          | N. individuals randomized |
|-------------------------|---------------------------|
| 1 Induction + L-CRT     | 387                       |
| 2 L-CRT + consolidation | 150                       |
| 3 L-CRT1                | 1992                      |
| 4 L-CRT2                | 1261                      |
| 5 S-RT + consolidation  | 1021                      |

### Pairwise meta-analysis

Risk ratios above 1 favor the first treatment of the comparison.

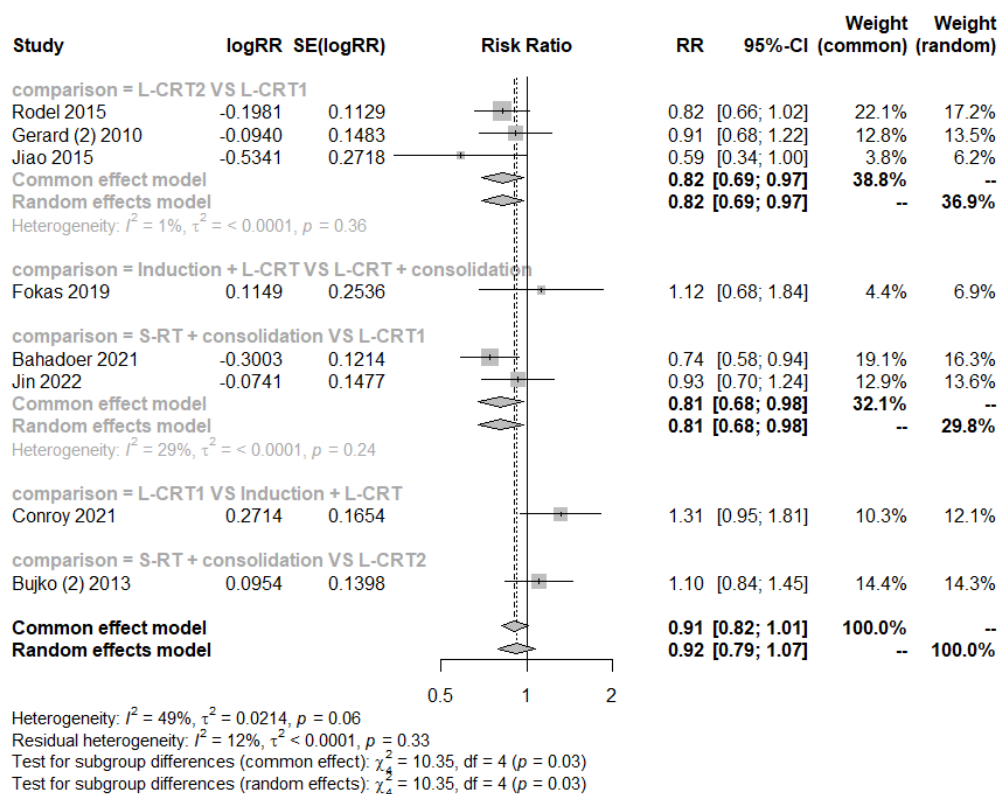

**Network map** The thickness of lines is proportional to the number of studies comparing the two treatments and the size of circles is proportional to the number of individuals for each treatment.

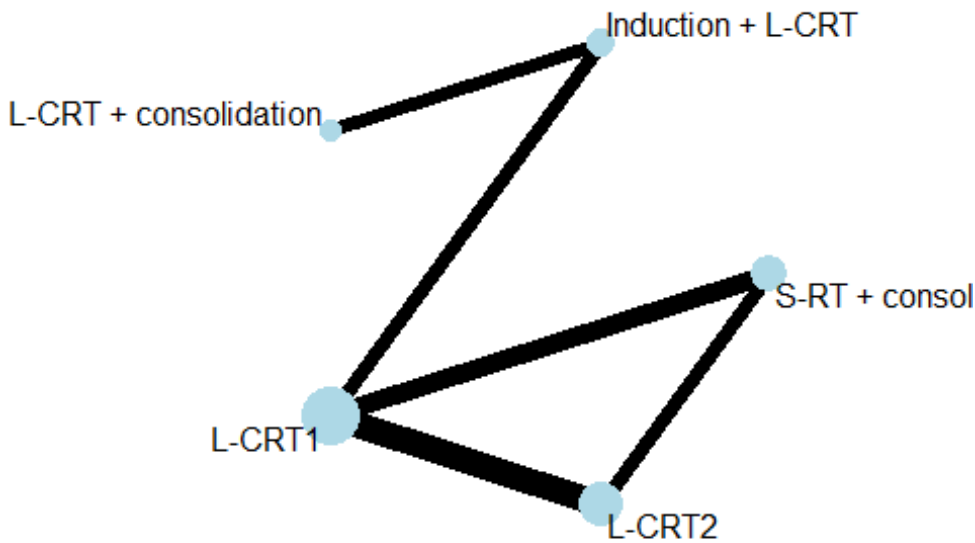

**Netleague table** Relative risks (RRs) and 95% confidence intervals (CIs) are reported. Results of the network meta-analysis are reported in the lower left part of the table and results from the pairwise meta-analysis are reported in the upper right part of the table. RRs higher than 1 favor the column-defining treatment.

|   | V1                  | V2                    | V3                  | V4                  | V5                   |
|---|---------------------|-----------------------|---------------------|---------------------|----------------------|
| 1 | Induction + L-CRT   | 1.12 (0.68 to 1.84)   | 0.76 (0.55 to 1.05) | .                   | .                    |
| 2 | 1.12 (0.68 to 1.84) | L-CRT + consolidation | .                   | .                   | .                    |
| 3 | 0.76 (0.55 to 1.05) | 0.68 (0.38 to 1.23)   | L-CRT1              | 1.22 (1.03 to 1.44) | 1.23 (1.03 to 1.48)  |
| 4 | 0.95 (0.66 to 1.36) | 0.85 (0.46 to 1.56)   | 1.24 (1.07 to 1.44) | L-CRT2              | 0.91 (0.69 to 1.20)  |
| 5 | 0.91 (0.64 to 1.31) | 0.82 (0.44 to 1.51)   | 1.20 (1.02 to 1.41) | 0.96 (0.80 to 1.16) | S-RT + consolidation |

**Forest plot** L-CRT-1 was used as a common comparator. RRs above 1 favor the strategy over the common comparator (L-CRT1).

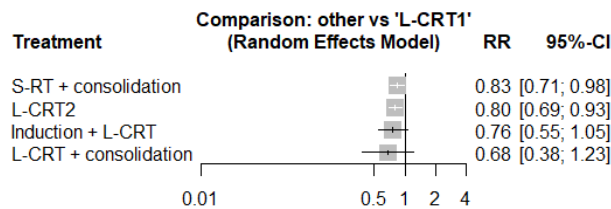

### Assessment of heterogeneity and consistency

#### Global heterogeneity

We interpreted  $\tau^2$  as follows: heterogeneity low with  $\tau^2 \leq 0.010$ , moderate with  $0.010 < \tau^2 \leq 0.242$ , high with  $\tau^2 > 0.242$ , and  $I^2$  statistics as follows: not important (0%-40%), moderate (30%-60%), substantial (50%-90%), considerable (75%-100%).



$\tau^2 = 0$  ;  $\tau = 0$

$I^2 = 0\%$  ( 0 % to 79.2 %)

Consistency: *global approach*

Q statistic to assess consistency under the assumption of a full design-by-treatment interaction random effects model

Q statistics to assess homogeneity / consistency

|                 | Q    | df | p-value |
|-----------------|------|----|---------|
| Total           | 3.75 | 4  | 0.4415  |
| Within designs  | 3.42 | 3  | 0.3313  |
| Between designs | 0.33 | 1  | 0.5680  |

Design-specific decomposition of within-designs Q statistic

| Design                      | Q    | df | p-value |
|-----------------------------|------|----|---------|
| L-CRT1:L-CRT2               | 2.02 | 2  | 0.3641  |
| L-CRT1:S-RT + consolidation | 1.40 | 1  | 0.2368  |

Between-designs Q statistic after detaching of single designs

| Detached design             | Q    | df | p-value |
|-----------------------------|------|----|---------|
| L-CRT1:L-CRT2               | 0.00 | 0  | --      |
| L-CRT1:S-RT + consolidation | 0.00 | 0  | --      |
| L-CRT2:S-RT + consolidation | 0.00 | 0  | --      |

Q statistic to assess consistency under the assumption of a full design-by-treatment interaction random effects model

|                 | Q    | df | p-value | $\tau$ .within | $\tau^2$ .within |
|-----------------|------|----|---------|----------------|------------------|
| Between designs | 0.24 | 1  | 0.6210  | 0.0566         | 0.0032           |

Consistency: *local approach*

Separate indirect from direct evidence (SIDE) using back-calculation method

Random effects model:

| comparison                  | k | prop | nma  | direct | indir. | RoR  | z     | p-value |
|-----------------------------|---|------|------|--------|--------|------|-------|---------|
| L-CRT1:L-CRT2               | 3 | 0.80 | 1.24 | 1.22   | 1.36   | 0.90 | -0.57 | 0.5680  |
| L-CRT1:S-RT + consolidation | 2 | 0.75 | 1.20 | 1.23   | 1.11   | 1.11 | 0.57  | 0.5680  |
| L-CRT2:S-RT + consolidation | 1 | 0.45 | 0.96 | 0.91   | 1.01   | 0.90 | -0.57 | 0.5680  |

Legend:

- comparison - Treatment comparison
- k - Number of studies providing direct evidence
- prop - Direct evidence proportion
- nma - Estimated treatment effect (RR) in network meta-analysis
- direct - Estimated treatment effect (RR) derived from direct evidence
- indir. - Estimated treatment effect (RR) derived from indirect evidence
- RoR - Ratio of Ratios (direct versus indirect)
- z - z-value of test for disagreement (direct versus indirect)
- p-value - p-value of test for disagreement (direct versus indirect)

**Netrank** Higher p-score values indicate higher ranking of treatments

|                      | P-score |
|----------------------|---------|
| L-CRT1               | 0.9585  |
| S-RT + consolidation | 0.5226  |
| L-CRT2               | 0.4174  |

|                       |        |
|-----------------------|--------|
| Induction + L-CRT     | 0.3565 |
| L-CRT + consolidation | 0.2449 |

## eAppendix 22. Distant recurrence rate at 5 years

### Characteristics of the network

Number of treatments:

5

Number of studies:

5

Number of individuals included:

3016

Number of individuals randomized to each treatment:

| Treatment name         | N. individuals randomized |
|------------------------|---------------------------|
| 1 Induction + L-CRT    | 54                        |
| 2 L-CRT1               | 1452                      |
| 3 L-CRT2               | 887                       |
| 4 S-RT + consolidation | 462                       |
| 5 S-RTearylly          | 161                       |

### Pairwise meta-analysis

Risk ratios above 1 favor the first treatment of the comparison.

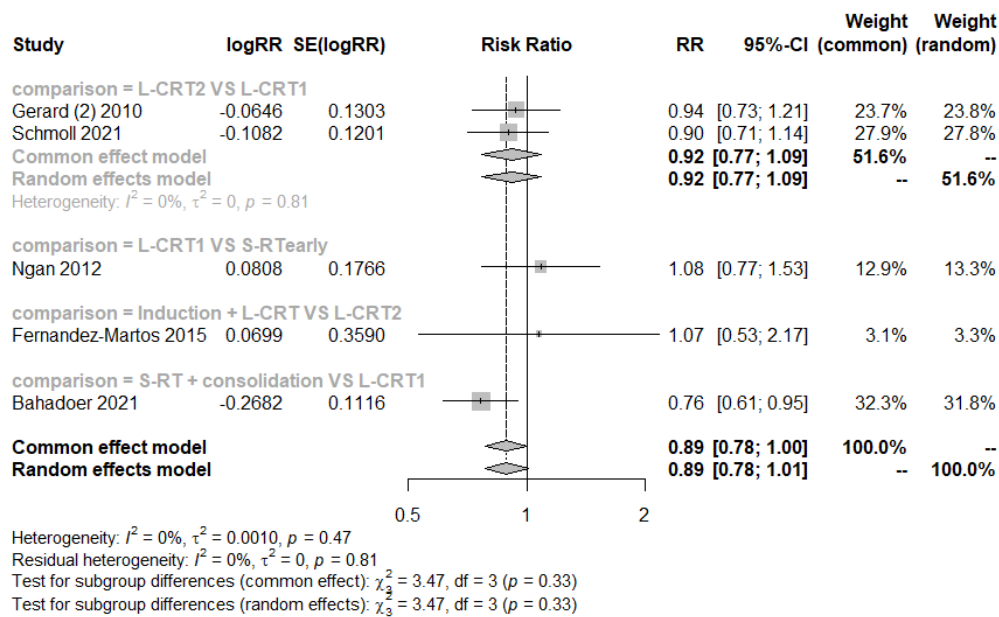

**Network map** The thickness of lines is proportional to the number of studies comparing the two treatments and the size of circles is proportional to the number of individuals for each treatment.

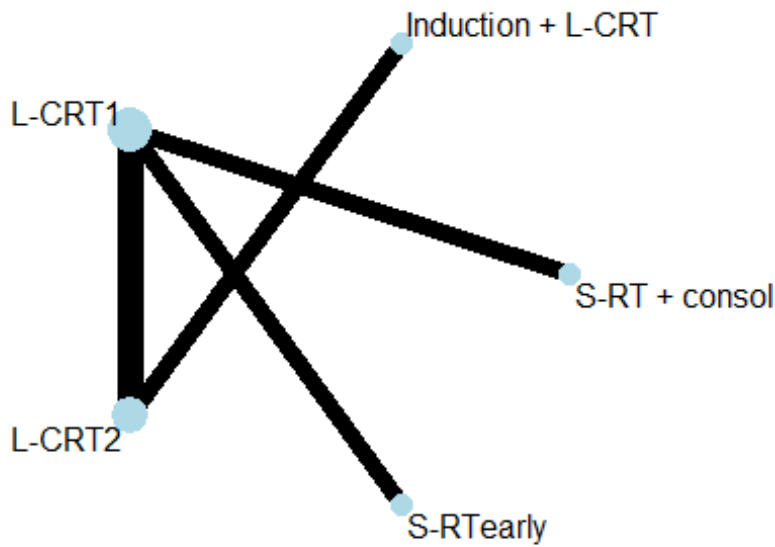

**Netleague table** Relative risks (RRs) and 95% confidence intervals (CIs) are reported. Results of the network meta-analysis are reported in the lower left part of the table and results from the pairwise meta-analysis are reported in the upper right part of the table. RRs higher than 1 favor the column-defining treatment.

|   | V1                  | V2                  | V3                  | V4                  | V5                   |
|---|---------------------|---------------------|---------------------|---------------------|----------------------|
| 1 | Induction + L-CRT   | .                   | 1.07 (0.53 to 2.17) | .                   | .                    |
| 2 | 0.98 (0.48 to 2.03) | L-CRT1              | 1.09 (0.92 to 1.30) | 1.08 (0.77 to 1.53) | 1.31 (1.05 to 1.63)  |
| 3 | 1.07 (0.53 to 2.17) | 1.09 (0.92 to 1.30) | L-CRT2              | .                   | .                    |
| 4 | 1.06 (0.48 to 2.38) | 1.08 (0.77 to 1.53) | 0.99 (0.67 to 1.46) | S-RTearly           | .                    |
| 5 | 1.28 (0.60 to 2.74) | 1.31 (1.05 to 1.63) | 1.20 (0.91 to 1.58) | 1.21 (0.80 to 1.82) | S-RT + consolidation |

**Forest plot** L-CRT-1 was used as a common comparator. RRs above 1 favor the strategy over the common comparator (L-CRT1).

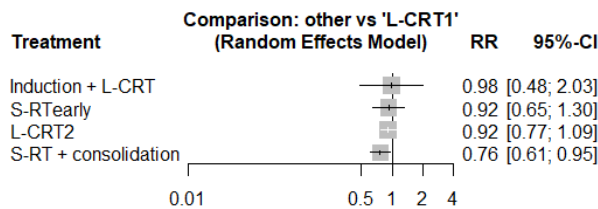

### Assessment of heterogeneity and consistency

#### Global heterogeneity

We interpreted  $\tau^2$  as follows: heterogeneity low with  $\tau^2 \leq 0.010$ , moderate with  $0.010 < \tau^2 \leq 0.242$ , high with  $\tau^2 > 0.242$ , and  $I^2$  statistics as follows: not important (0%-40%), moderate (30%-60%), substantial (50%-90%), considerable (75%-100%).

$\tau^2 = 0$  ;  $\tau = 0$

$I^2 = 0\%$  ( NA % to NA %)

Consistency: global approach

Q statistic to assess consistency under the assumption of a full design-by-treatment interaction random effects model

Q statistics to assess homogeneity / consistency

|                 | Q    | df | p-value |
|-----------------|------|----|---------|
| Total           | 0.06 | 1  | 0.8056  |
| Within designs  | 0.06 | 1  | 0.8056  |
| Between designs | 0.00 | 0  | --      |

Design-specific decomposition of within-designs Q statistic

| Design        | Q    | df | p-value |
|---------------|------|----|---------|
| L-CRT1:L-CRT2 | 0.06 | 1  | 0.8056  |

Q statistic to assess consistency under the assumption of a full design-by-treatment interaction random effects model

|                 | Q    | df | p-value | $\tau^2$ .within | $\tau^2$ .within |
|-----------------|------|----|---------|------------------|------------------|
| Between designs | 0.00 | 0  | --      | 0                | 0                |

Consistency: local approach

Separate indirect from direct evidence (SIDE) using back-calculation method

Random effects model:

comparison k nma direct indir. RoR z p-value

Legend:

comparison - Treatment comparison  
k - Number of studies providing direct evidence  
nma - Estimated treatment effect (RR) in network meta-analysis  
direct - Estimated treatment effect (RR) derived from direct evidence  
indir. - Estimated treatment effect (RR) derived from indirect evidence  
RoR - Ratio of Ratios (direct versus indirect)  
z - z-value of test for disagreement (direct versus indirect)  
p-value - p-value of test for disagreement (direct versus indirect)

**Netrank** Higher p-score values indicate higher ranking of treatments

|                      | P-score |
|----------------------|---------|
| L-CRT1               | 0.7573  |
| Induction + L-CRT    | 0.5898  |
| S-RTearly            | 0.5232  |
| L-CRT2               | 0.4910  |
| S-RT + consolidation | 0.1387  |

## eAppendix 23. Disease-Free Survival at 3 years

### Characteristics of the network

Number of treatments:

7

Number of studies:

13

Number of individuals included:

7409

Number of individuals randomized to each treatment:

|   | Treatment name        | N. individuals randomized |
|---|-----------------------|---------------------------|
| 1 | CHT                   | 165                       |
| 2 | Induction + L-CRT     | 387                       |
| 3 | L-CRT + consolidation | 210                       |
| 4 | L-CRT1                | 3156                      |
| 5 | L-CRT2                | 2395                      |
| 6 | S-RT + consolidation  | 1021                      |
| 7 | S-RTdelayed           | 75                        |

### Pairwise meta-analysis

Risk ratios above 1 favor the first treatment of the comparison.

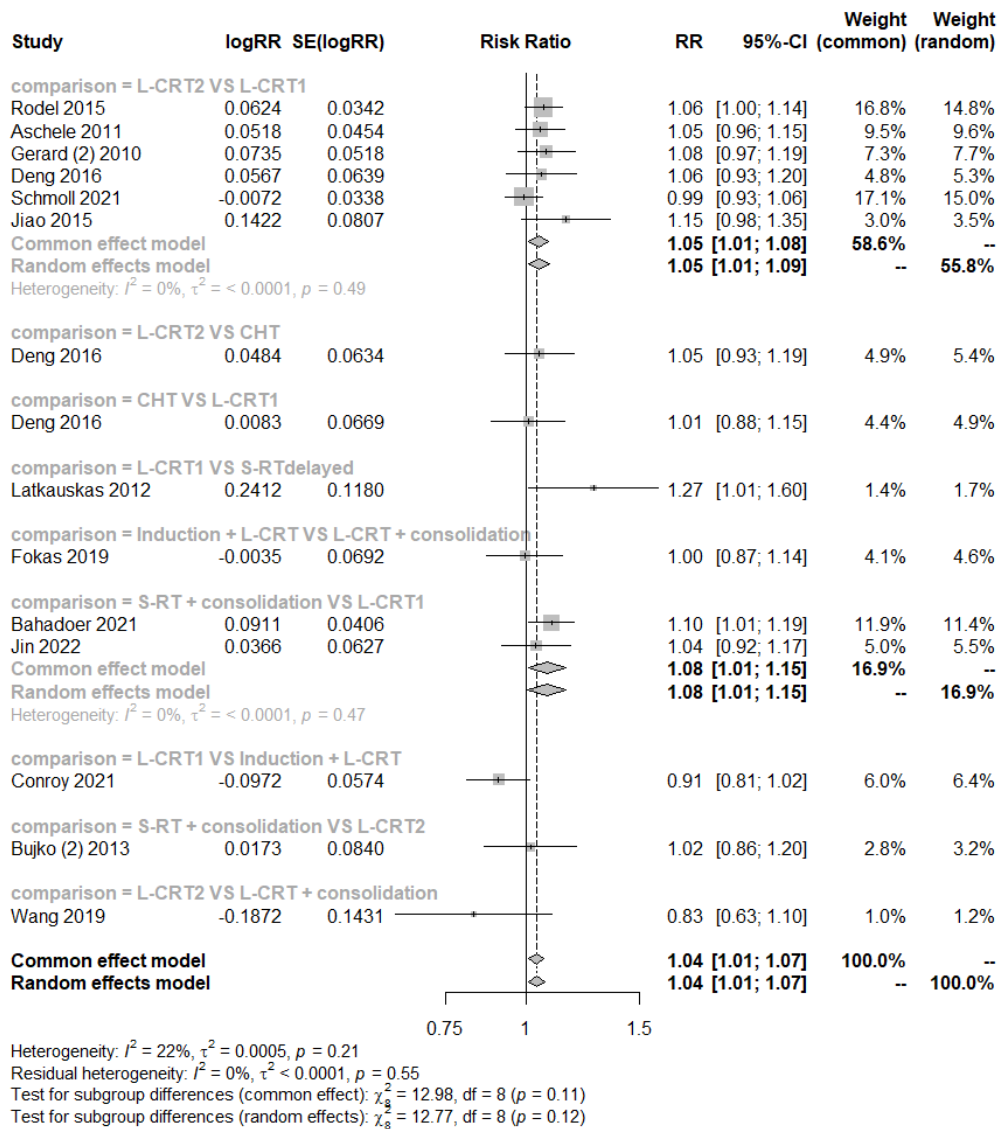

**Network map** The thickness of lines is proportional to the number of studies comparing the two treatments and the size of circles is proportional to the number of individuals for each treatment.

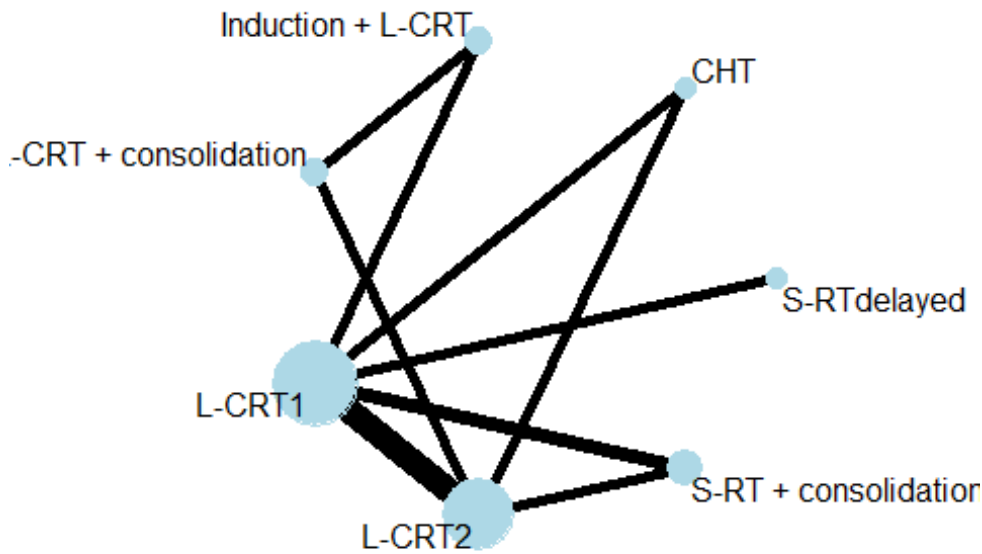

**Netleague table** Relative risks (RRs) and 95% confidence intervals (CIs) are reported. Results of the network meta-analysis are reported in the lower left part of the table and results from the pairwise meta-analysis are reported in the upper right part of the table. RRs higher than 1 favor the column-defining treatment.

|   | V1                  | V2                  | V3                    | V4                  | V5                  | V6                   | V7                  |
|---|---------------------|---------------------|-----------------------|---------------------|---------------------|----------------------|---------------------|
| 1 | CHT                 | .                   | .                     | 1.01 (0.88 to 1.15) | 0.95 (0.84 to 1.08) | .                    | .                   |
| 2 | 0.90 (0.77 to 1.04) | Induction + L-CRT   | 1.00 (0.87 to 1.14)   | 1.10 (0.98 to 1.23) | .                   | .                    | .                   |
| 3 | 0.87 (0.72 to 1.05) | 0.97 (0.86 to 1.10) | L-CRT + consolidation | .                   | 1.21 (0.91 to 1.60) | .                    | .                   |
| 4 | 1.00 (0.89 to 1.12) | 1.12 (1.01 to 1.24) | 1.15 (0.99 to 1.33)   | L-CRT1              | 0.96 (0.92 to 0.99) | 0.93 (0.87 to 0.99)  | 1.27 (1.01 to 1.60) |
| 5 | 0.96 (0.86 to 1.07) | 1.07 (0.96 to 1.20) | 1.10 (0.94 to 1.28)   | 0.96 (0.92 to 0.99) | L-CRT2              | 0.98 (0.83 to 1.16)  | .                   |
| 6 | 0.93 (0.82 to 1.06) | 1.04 (0.92 to 1.18) | 1.07 (0.91 to 1.25)   | 0.93 (0.87 to 0.99) | 0.97 (0.91 to 1.04) | S-RT + consolidation | .                   |
| 7 | 1.27 (0.99 to 1.65) | 1.42 (1.10 to 1.84) | 1.46 (1.11 to 1.92)   | 1.27 (1.01 to 1.60) | 1.33 (1.05 to 1.68) | 1.37 (1.08 to 1.74)  | S-RTdelayed         |

**Forest plot** L-CRT-1 was used as a common comparator. RRs above 1 favor the strategy over the common comparator (L-CRT1).

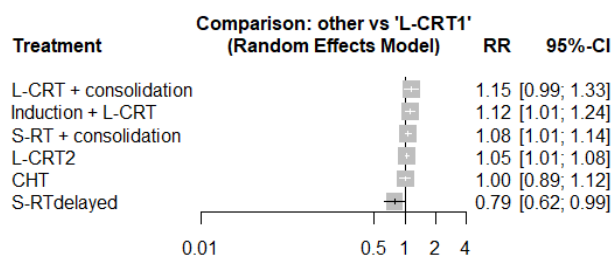

### Assessment of heterogeneity and consistency

#### Global heterogeneity

We interpreted  $\tau^2$  as follows: heterogeneity low with  $\tau^2 \leq 0.010$ , moderate with  $0.010 < \tau^2 \leq 0.242$ , high with  $\tau^2 > 0.242$ , and  $I^2$  statistics as follows: not important (0%-40%), moderate (30%-60%), substantial (50%-90%), considerable (75%-100%).



$\tau^2 = 0$  ;  $\tau = 0$

$I^2 = 0\%$  ( 0 % to 64.8 %)

Consistency: global approach

Q statistic to assess consistency under the assumption of a full design-by-treatment interaction random effects model

Q statistics to assess homogeneity / consistency

|                 | Q    | df | p-value |
|-----------------|------|----|---------|
| Total           | 5.60 | 8  | 0.6917  |
| Within designs  | 4.94 | 5  | 0.4228  |
| Between designs | 0.66 | 3  | 0.8829  |

Design-specific decomposition of within-designs Q statistic

| Design                      | Q    | df | p-value |
|-----------------------------|------|----|---------|
| L-CRT1:L-CRT2               | 4.41 | 4  | 0.3532  |
| L-CRT1:S-RT + consolidation | 0.53 | 1  | 0.4654  |

Between-designs Q statistic after detaching of single designs

| Detached design                         | Q    | df | p-value |
|-----------------------------------------|------|----|---------|
| Induction + L-CRT:L-CRT + consolidation | 0.05 | 2  | 0.9742  |
| L-CRT + consolidation:L-CRT2            | 0.05 | 2  | 0.9742  |
| L-CRT1:Induction + L-CRT                | 0.05 | 2  | 0.9742  |
| L-CRT1:L-CRT2                           | 0.66 | 2  | 0.7195  |
| L-CRT1:S-RT + consolidation             | 0.64 | 2  | 0.7276  |
| L-CRT2:S-RT + consolidation             | 0.64 | 2  | 0.7276  |

Q statistic to assess consistency under the assumption of a full design-by-treatment interaction random effects model

|                 | Q    | df | p-value | $\tau$ .within | $\tau^2$ .within |
|-----------------|------|----|---------|----------------|------------------|
| Between designs | 0.66 | 3  | 0.8829  | 0              | 0                |

Consistency: local approach

Separate indirect from direct evidence (SIDE) using back-calculation method

Random effects model:

| comparison                              | k | prop | nma  | direct | indir. | RoR  | z     | p-value |
|-----------------------------------------|---|------|------|--------|--------|------|-------|---------|
| L-CRT1:CHT                              | 1 | 0.74 | 1.00 | 0.99   | 1.02   | 0.97 | -0.20 | 0.8408  |
| CHT:L-CRT2                              | 1 | 0.82 | 0.96 | 0.95   | 0.98   | 0.97 | -0.20 | 0.8408  |
| Induction + L-CRT:L-CRT + consolidation | 1 | 0.83 | 0.97 | 1.00   | 0.87   | 1.14 | 0.78  | 0.4362  |
| L-CRT1:Induction + L-CRT                | 1 | 0.89 | 0.89 | 0.91   | 0.79   | 1.14 | 0.78  | 0.4362  |
| L-CRT + consolidation:L-CRT2            | 1 | 0.29 | 1.10 | 1.21   | 1.06   | 1.14 | 0.78  | 0.4362  |
| L-CRT1:L-CRT2                           | 6 | 0.95 | 0.96 | 0.96   | 0.97   | 0.98 | -0.24 | 0.8087  |
| L-CRT1:S-RT + consolidation             | 2 | 0.86 | 0.93 | 0.93   | 0.94   | 0.99 | -0.15 | 0.8804  |
| L-CRT2:S-RT + consolidation             | 1 | 0.17 | 0.97 | 0.98   | 0.97   | 1.01 | 0.15  | 0.8804  |

Legend:

- comparison - Treatment comparison
- k - Number of studies providing direct evidence
- prop - Direct evidence proportion
- nma - Estimated treatment effect (RR) in network meta-analysis
- direct - Estimated treatment effect (RR) derived from direct evidence
- indir. - Estimated treatment effect (RR) derived from indirect evidence
- RoR - Ratio of Ratios (direct versus indirect)

z - z-value of test for disagreement (direct versus indirect)  
p-value - p-value of test for disagreement (direct versus indirect)

**Netrank** Higher p-score values indicate higher ranking of treatments

|                       | P-score |
|-----------------------|---------|
| L-CRT + consolidation | 0.8687  |
| Induction + L-CRT     | 0.8106  |
| S-RT + consolidation  | 0.6872  |
| L-CRT2                | 0.5319  |
| CHT                   | 0.3326  |
| L-CRT1                | 0.2568  |
| S-RTdelayed           | 0.0121  |

## eAppendix 24. Disease-Free Survival at 5 years

### Characteristics of the network

Number of treatments:

6

Number of studies:

7

Number of individuals included:

5302

Number of individuals randomized to each treatment:

| Treatment name         | N. individuals randomized |
|------------------------|---------------------------|
| 1 CHT                  | 585                       |
| 2 Induction + L-CRT    | 54                        |
| 3 L-CRT1               | 2585                      |
| 4 L-CRT2               | 1249                      |
| 5 L-RT                 | 367                       |
| 6 S-RT + consolidation | 462                       |

### Pairwise meta-analysis

Risk ratios above 1 favor the first treatment of the comparison.

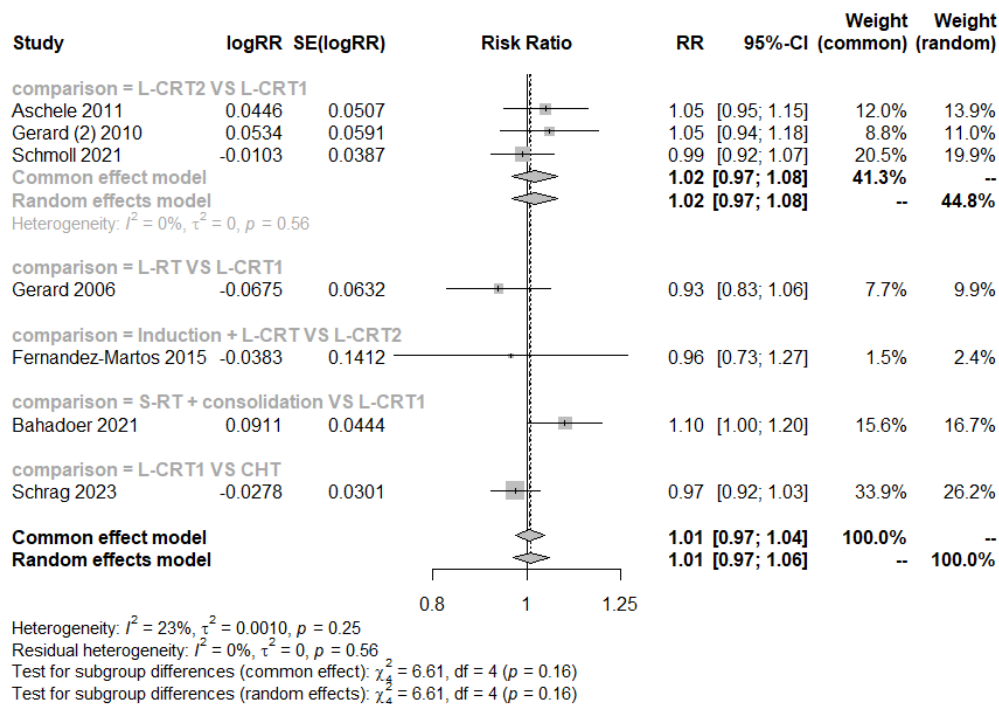

**Network map** The thickness of lines is proportional to the number of studies comparing the two treatments and the size of circles is proportional to the number of individuals for each treatment.

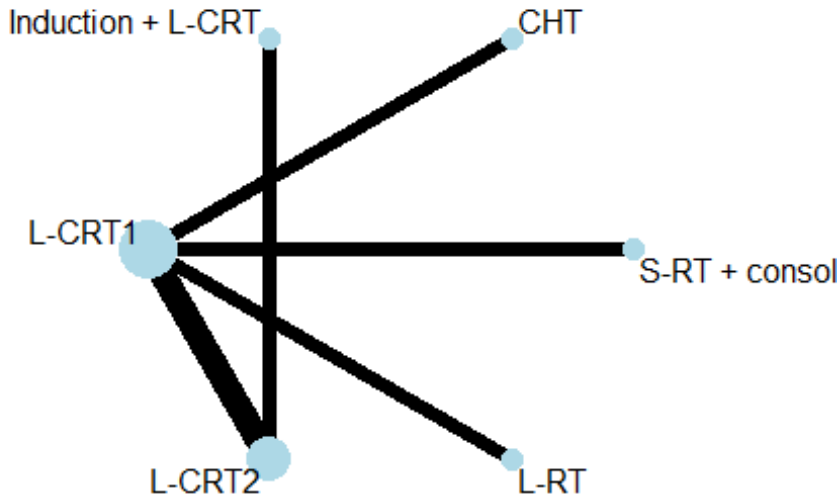

**Netleague table** Relative risks (RRs) and 95% confidence intervals (CIs) are reported. Results of the network meta-analysis are reported in the lower left part of the table and results from the pairwise meta-analysis are reported in the upper right part of the table. RRs higher than 1 favor the column-defining treatment.

|   | V1                  | V2                  | V3                  | V4                  | V5                  | V6                   |
|---|---------------------|---------------------|---------------------|---------------------|---------------------|----------------------|
| 1 | CHT                 |                     | 1.03 (0.97 to 1.09) |                     |                     |                      |
| 2 | 1.05 (0.79 to 1.40) | Induction + L-CRT   |                     | 0.96 (0.73 to 1.27) |                     |                      |
| 3 | 1.03 (0.97 to 1.09) | 0.98 (0.74 to 1.30) | L-CRT1              | 0.98 (0.93 to 1.03) | 1.07 (0.95 to 1.21) | 0.91 (0.84 to 1.00)  |
| 4 | 1.01 (0.93 to 1.09) | 0.96 (0.73 to 1.27) | 0.98 (0.93 to 1.03) | L-CRT2              |                     |                      |
| 5 | 1.10 (0.96 to 1.26) | 1.05 (0.77 to 1.43) | 1.07 (0.95 to 1.21) | 1.09 (0.95 to 1.25) | L-RT                |                      |
| 6 | 0.94 (0.84 to 1.04) | 0.90 (0.67 to 1.20) | 0.91 (0.84 to 1.00) | 0.93 (0.84 to 1.03) | 0.85 (0.73 to 0.99) | S-RT + consolidation |

**Forest plot** L-CRT-1 was used as a common comparator. RRs above 1 favor the strategy over the common comparator (L-CRT1).

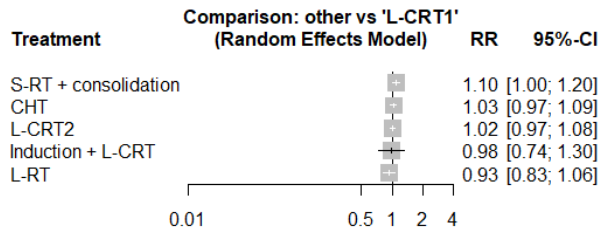

**Assessment of heterogeneity and consistency**

*Global heterogeneity*

We interpreted  $\tau^2$  as follows: heterogeneity low with  $\tau^2 \leq 0.010$ , moderate with  $0.010 < \tau^2 \leq 0.242$ , high with  $\tau^2 > 0.242$ , and  $I^2$  statistics as follows: not important (0%-40%), moderate (30%-60%), substantial (50%-90%), considerable (75%-100%).

$\tau^2 = 0$  ;  $\tau = 0$

$I^2 = 0\%$  ( 0 % to 89.6 %)

Consistency: global approach

Q statistic to assess consistency under the assumption of a full design-by-treatment interaction random effects model

Q statistics to assess homogeneity / consistency

|                 | Q    | df | p-value |
|-----------------|------|----|---------|
| Total           | 1.17 | 2  | 0.5581  |
| Within designs  | 1.17 | 2  | 0.5581  |
| Between designs | 0.00 | 0  | --      |

Design-specific decomposition of within-designs Q statistic

| Design        | Q    | df | p-value |
|---------------|------|----|---------|
| L-CRT1:L-CRT2 | 1.17 | 2  | 0.5581  |

Q statistic to assess consistency under the assumption of a full design-by-treatment interaction random effects model

|                 | Q    | df | p-value | $\tau$ .within | $\tau^2$ .within |
|-----------------|------|----|---------|----------------|------------------|
| Between designs | 0.00 | 0  | --      | 0              | 0                |

Consistency: local approach

Separate indirect from direct evidence (SIDE) using back-calculation method

Random effects model:

comparison k nma direct indir. RoR z p-value

Legend:

comparison - Treatment comparison  
k - Number of studies providing direct evidence  
nma - Estimated treatment effect (RR) in network meta-analysis  
direct - Estimated treatment effect (RR) derived from direct evidence  
indir. - Estimated treatment effect (RR) derived from indirect evidence  
RoR - Ratio of Ratios (direct versus indirect)  
z - z-value of test for disagreement (direct versus indirect)  
p-value - p-value of test for disagreement (direct versus indirect)

**Netrank** Higher p-score values indicate higher ranking of treatments

|                      | P-score |
|----------------------|---------|
| S-RT + consolidation | 0.9049  |
| CHT                  | 0.6128  |
| L-CRT2               | 0.5523  |
| Induction + L-CRT    | 0.4135  |
| L-CRT1               | 0.3698  |
| L-RT                 | 0.1465  |

## eAppendix 25. Overall survival at 3 years

### Characteristics of the network

Number of treatments:

7

Number of studies:

11

Number of individuals included:

5576

Number of individuals randomized to each treatment:

|   | Treatment name        | N. individuals randomized |
|---|-----------------------|---------------------------|
| 1 | CHT                   | 165                       |
| 2 | Induction + L-CRT     | 387                       |
| 3 | L-CRT + consolidation | 210                       |
| 4 | L-CRT1                | 2232                      |
| 5 | L-CRT2                | 1486                      |
| 6 | S-RT + consolidation  | 1021                      |
| 7 | S-RTdelayed           | 75                        |

### Pairwise meta-analysis

Risk ratios above 1 favor the first treatment of the comparison.

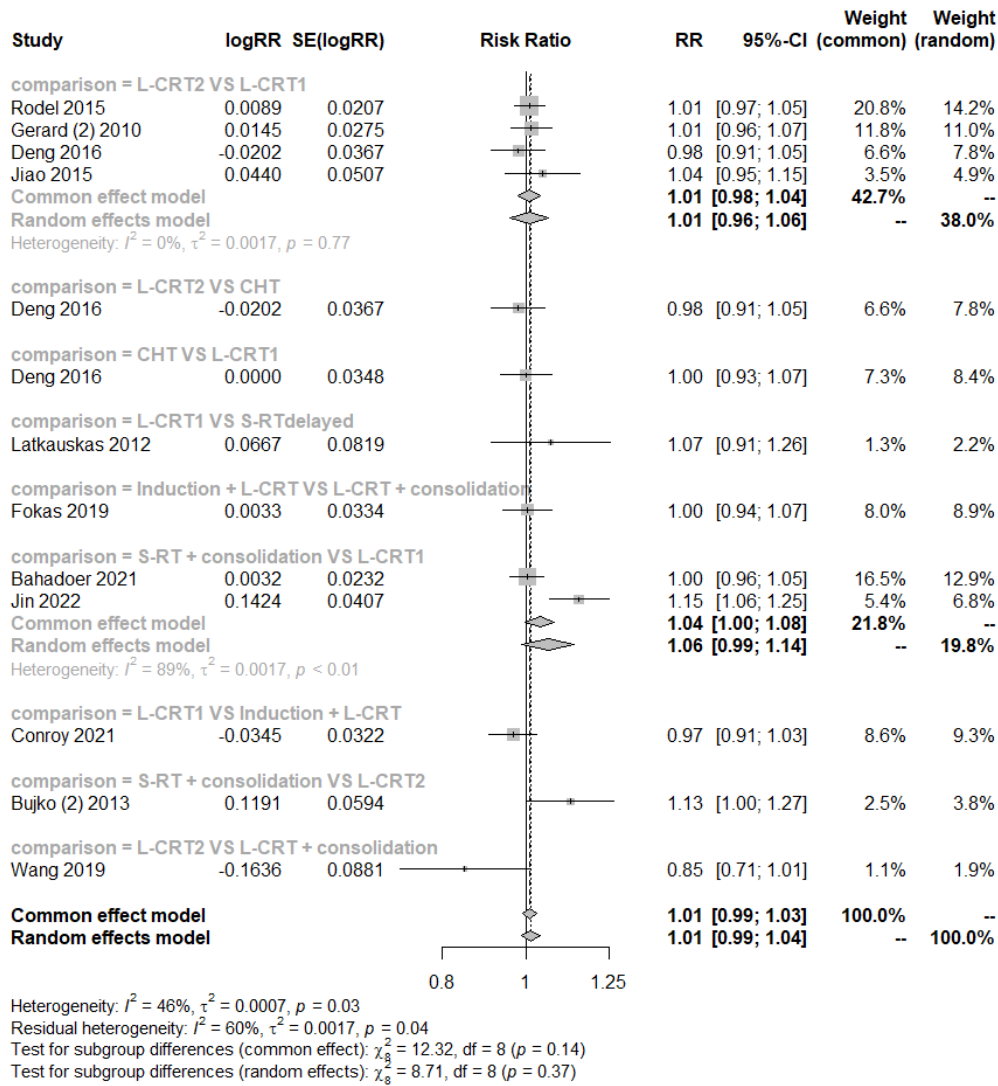

**Network map** The thickness of lines is proportional to the number of studies comparing the two treatments and the size of circles is proportional to the number of individuals for each treatment.

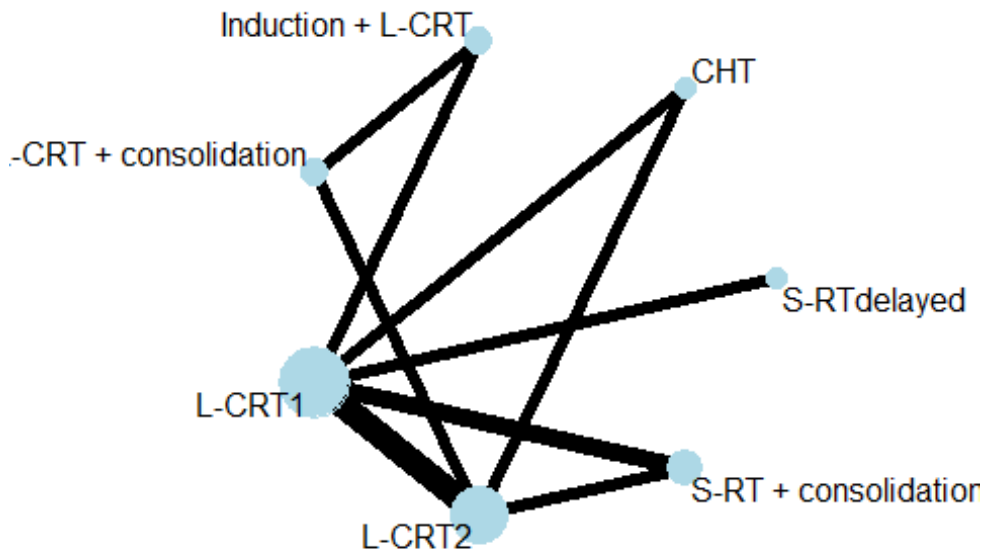

**Netleague table** Relative risks (RRs) and 95% confidence intervals (CIs) are reported. Results of the network meta-analysis are reported in the lower left part of the table and results from the pairwise meta-analysis are reported in the upper right part of the table. RRs higher than 1 favor the column-defining treatment.

|   | V1                  | V2                  | V3                    | V4                  | V5                  | V6                   | V7                  |
|---|---------------------|---------------------|-----------------------|---------------------|---------------------|----------------------|---------------------|
| 1 | CHT                 | .                   | .                     | 1.00 (0.90 to 1.11) | 1.02 (0.92 to 1.14) | .                    | .                   |
| 2 | 0.95 (0.84 to 1.08) | Induction + L-CRT   | 1.00 (0.91 to 1.11)   | 1.04 (0.94 to 1.14) | .                   | .                    | .                   |
| 3 | 0.93 (0.81 to 1.08) | 0.98 (0.89 to 1.07) | L-CRT + consolidation | .                   | 1.18 (0.97 to 1.42) | .                    | .                   |
| 4 | 1.01 (0.92 to 1.11) | 1.06 (0.97 to 1.16) | 1.08 (0.96 to 1.21)   | L-CRT1              | 0.99 (0.94 to 1.04) | 0.94 (0.88 to 1.01)  | 1.07 (0.89 to 1.28) |
| 5 | 1.01 (0.92 to 1.11) | 1.06 (0.96 to 1.17) | 1.08 (0.96 to 1.22)   | 1.00 (0.96 to 1.05) | L-CRT2              | 0.89 (0.77 to 1.02)  | .                   |
| 6 | 0.94 (0.84 to 1.05) | 0.99 (0.88 to 1.10) | 1.01 (0.88 to 1.15)   | 0.93 (0.87 to 0.99) | 0.93 (0.86 to 1.00) | S-RT + consolidation | .                   |
| 7 | 1.08 (0.88 to 1.32) | 1.13 (0.93 to 1.38) | 1.16 (0.93 to 1.43)   | 1.07 (0.89 to 1.28) | 1.07 (0.89 to 1.28) | 1.15 (0.95 to 1.39)  | S-RTdelayed         |

**Forest plot** L-CRT-1 was used as a common comparator. RRs above 1 favor the strategy over the common comparator (L-CRT1).

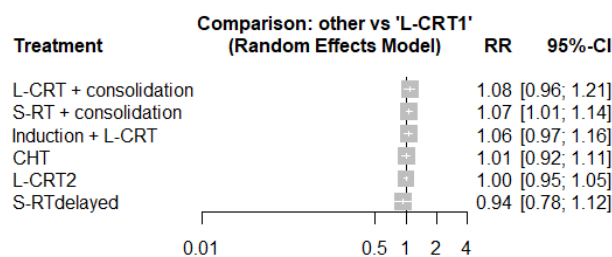

### Assessment of heterogeneity and consistency

#### Global heterogeneity

We interpreted  $\tau^2$  as follows: heterogeneity low with  $\tau^2 \leq 0.010$ , moderate with  $0.010 < \tau^2 \leq 0.242$ , high with  $\tau^2 > 0.242$ , and  $I^2$  statistics as follows: not important (0%-40%), moderate (30%-60%), substantial (50%-90%), considerable (75%-100%).



$\tau^2 = 0.0016$  ;  $\tau = 0.0401$

$I^2 = 56.51\%$  ( 0 % to 81.28 %)

Consistency: *global approach*

Q statistic to assess consistency under the assumption of a full design-by-treatment interaction random effects model

Q statistics to assess homogeneity / consistency

|                 | Q     | df | p-value |
|-----------------|-------|----|---------|
| Total           | 13.80 | 6  | 0.0320  |
| Within designs  | 9.24  | 3  | 0.0262  |
| Between designs | 4.55  | 3  | 0.2074  |

Design-specific decomposition of within-designs Q statistic

| Design                      | Q    | df | p-value |
|-----------------------------|------|----|---------|
| L-CRT1:L-CRT2               | 0.41 | 2  | 0.8140  |
| L-CRT1:S-RT + consolidation | 8.83 | 1  | 0.0030  |

Between-designs Q statistic after detaching of single designs

| Detached design                         | Q    | df | p-value |
|-----------------------------------------|------|----|---------|
| Induction + L-CRT:L-CRT + consolidation | 2.71 | 2  | 0.2584  |
| L-CRT + consolidation:L-CRT2            | 2.71 | 2  | 0.2584  |
| L-CRT1:Induction + L-CRT                | 2.71 | 2  | 0.2584  |
| L-CRT1:L-CRT2                           | 1.57 | 2  | 0.4564  |
| L-CRT1:S-RT + consolidation             | 2.71 | 2  | 0.2583  |
| L-CRT2:S-RT + consolidation             | 2.71 | 2  | 0.2583  |

Q statistic to assess consistency under the assumption of a full design-by-treatment interaction random effects model

|                 | Q    | df | p-value | $\tau$ .within | $\tau^2$ .within |
|-----------------|------|----|---------|----------------|------------------|
| Between designs | 2.06 | 3  | 0.5604  | 0.0446         | 0.0020           |

Consistency: *local approach*

Separate indirect from direct evidence (SIDE) using back-calculation method

Random effects model:

| comparison                              | k | prop | nma  | direct | indir. | RoR  | z     | p-value |
|-----------------------------------------|---|------|------|--------|--------|------|-------|---------|
| L-CRT1:CHT                              | 1 | 0.81 | 0.99 | 1.00   | 0.96   | 1.05 | 0.36  | 0.7159  |
| CHT:L-CRT2                              | 1 | 0.78 | 1.01 | 1.02   | 0.98   | 1.04 | 0.36  | 0.7159  |
| Induction + L-CRT:L-CRT + consolidation | 1 | 0.82 | 0.98 | 1.00   | 0.88   | 1.14 | 1.09  | 0.2743  |
| L-CRT1:Induction + L-CRT                | 1 | 0.83 | 0.94 | 0.97   | 0.84   | 1.14 | 1.09  | 0.2743  |
| L-CRT + consolidation:L-CRT2            | 1 | 0.39 | 1.08 | 1.18   | 1.03   | 1.14 | 1.09  | 0.2743  |
| L-CRT1:L-CRT2                           | 4 | 0.87 | 1.00 | 0.99   | 1.09   | 0.91 | -1.28 | 0.1998  |
| L-CRT1:S-RT + consolidation             | 2 | 0.82 | 0.93 | 0.94   | 0.88   | 1.07 | 0.76  | 0.4468  |
| L-CRT2:S-RT + consolidation             | 1 | 0.27 | 0.93 | 0.89   | 0.95   | 0.94 | -0.76 | 0.4468  |

Legend:

- comparison - Treatment comparison
- k - Number of studies providing direct evidence
- prop - Direct evidence proportion
- nma - Estimated treatment effect (RR) in network meta-analysis
- direct - Estimated treatment effect (RR) derived from direct evidence
- indir. - Estimated treatment effect (RR) derived from indirect evidence
- RoR - Ratio of Ratios (direct versus indirect)

z - z-value of test for disagreement (direct versus indirect)  
p-value - p-value of test for disagreement (direct versus indirect)

**Netrank** Higher p-score values indicate higher ranking of treatments

|                       | P-score |
|-----------------------|---------|
| S-RT + consolidation  | 0.7965  |
| L-CRT + consolidation | 0.7953  |
| Induction + L-CRT     | 0.6967  |
| CHT                   | 0.4112  |
| L-CRT1                | 0.3256  |
| L-CRT2                | 0.3090  |
| S-RTdelayed           | 0.1657  |

## eAppendix 26. Overall survival at 5 years

### Characteristics of the network

Number of treatments:

7

Number of studies:

8

Number of individuals included:

5625

Number of individuals randomized to each treatment:

| Treatment name         | N. individuals randomized |
|------------------------|---------------------------|
| 1 CHT                  | 585                       |
| 2 Induction + L-CRT    | 54                        |
| 3 L-CRT1               | 2747                      |
| 4 L-CRT2               | 1249                      |
| 5 L-RT                 | 367                       |
| 6 S-RT + consolidation | 462                       |
| 7 S-RTearly            | 161                       |

### Pairwise meta-analysis

Risk ratios above 1 favor the first treatment of the comparison.

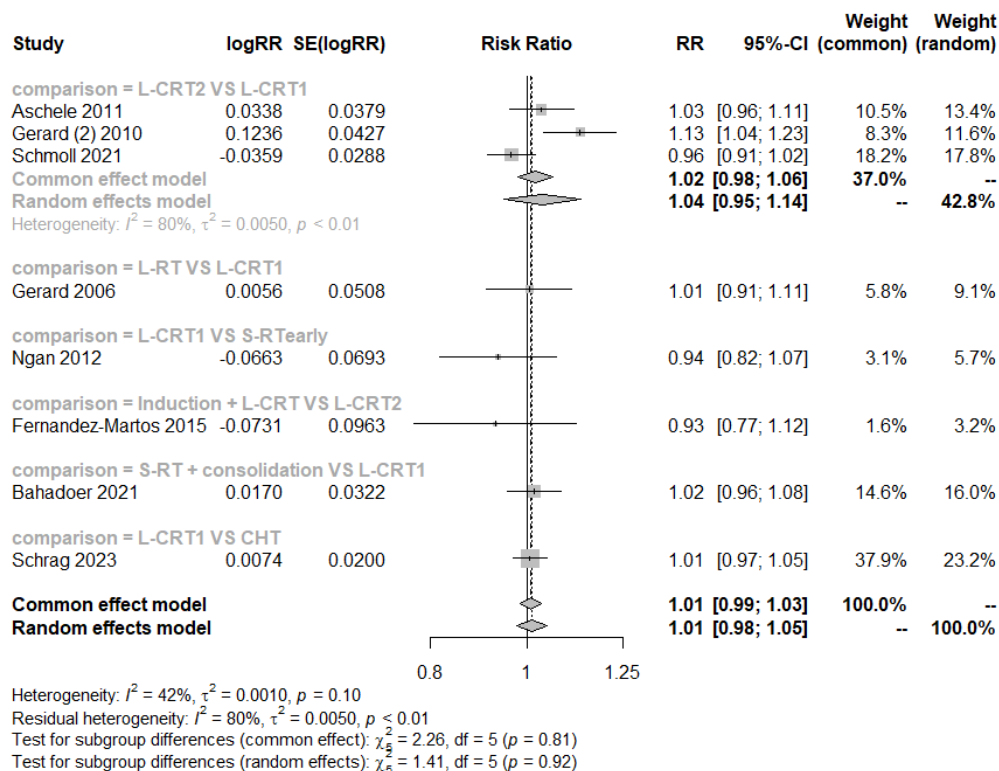

**Network map** The thickness of lines is proportional to the number of studies comparing the two treatments and the size of circles is proportional to the number of individuals for each treatment.

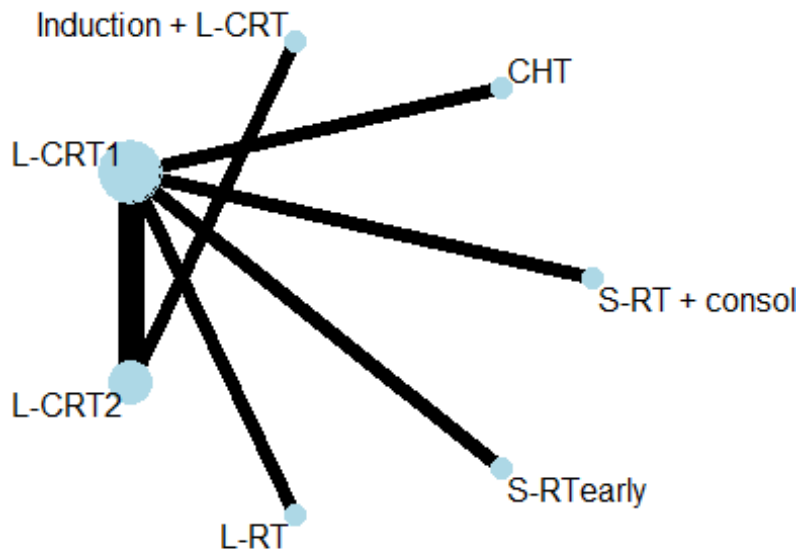

**Netleague table** Relative risks (RRs) and 95% confidence intervals (CIs) are reported. Results of the network meta-analysis are reported in the lower left part of the table and results from the pairwise meta-analysis are reported in the upper right part of the table. RRs higher than 1 favor the column-defining treatment.

|   | V1                  | V2                  | V3                  | V4                  | V5                  | V6                  | V7                   |
|---|---------------------|---------------------|---------------------|---------------------|---------------------|---------------------|----------------------|
| 1 | CHT                 | .                   | 0.99 (0.86 to 1.15) | .                   | .                   | .                   | .                    |
| 2 | 1.03 (0.77 to 1.38) | Induction + L-CRT   | .                   | 0.93 (0.74 to 1.18) | .                   | .                   | .                    |
| 3 | 0.99 (0.86 to 1.15) | 0.96 (0.75 to 1.24) | L-CRT1              | 0.96 (0.88 to 1.06) | 0.99 (0.84 to 1.18) | 0.94 (0.77 to 1.14) | 0.98 (0.84 to 1.15)  |
| 4 | 0.96 (0.81 to 1.14) | 0.93 (0.74 to 1.18) | 0.96 (0.88 to 1.06) | L-CRT2              | .                   | .                   | .                    |
| 5 | 0.99 (0.79 to 1.24) | 0.96 (0.71 to 1.30) | 0.99 (0.84 to 1.18) | 1.03 (0.85 to 1.25) | L-RT                | .                   | .                    |
| 6 | 0.93 (0.73 to 1.18) | 0.90 (0.66 to 1.24) | 0.94 (0.77 to 1.14) | 0.97 (0.78 to 1.20) | 0.94 (0.73 to 1.22) | S-RTearly           | .                    |
| 7 | 0.98 (0.79 to 1.20) | 0.95 (0.71 to 1.27) | 0.98 (0.84 to 1.15) | 1.02 (0.85 to 1.22) | 0.99 (0.79 to 1.24) | 1.05 (0.82 to 1.35) | S-RT + consolidation |

**Forest plot** L-CRT-1 was used as a common comparator. RRs above 1 favor the strategy over the common comparator (L-CRT1).

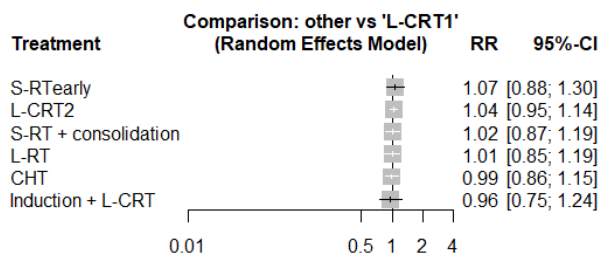

### Assessment of heterogeneity and consistency

#### Global heterogeneity

We interpreted  $\tau^2$  as follows: heterogeneity low with  $\tau^2 \leq 0.010$ , moderate with  $0.010 < \tau^2 \leq 0.242$ , high with  $\tau^2 > 0.242$ , and  $I^2$  statistics as follows: not important (0%-40%), moderate (30%-60%), substantial (50%-90%), considerable (75%-100%).

$\tau^2 = 0.0051$  ;  $\tau = 0.0712$

$I^2 = 79.58\%$  ( 35.15 % to 93.57 %)

Consistency: global approach

Q statistic to assess consistency under the assumption of a full design-by-treatment interaction random effects model

Q statistics to assess homogeneity / consistency

|                 | Q    | df | p-value |
|-----------------|------|----|---------|
| Total           | 9.80 | 2  | 0.0075  |
| Within designs  | 9.80 | 2  | 0.0075  |
| Between designs | 0.00 | 0  | --      |

Design-specific decomposition of within-designs Q statistic

| Design        | Q    | df | p-value |
|---------------|------|----|---------|
| L-CRT1:L-CRT2 | 9.80 | 2  | 0.0075  |

Q statistic to assess consistency under the assumption of a full design-by-treatment interaction random effects model

|                 | Q    | df | p-value | $\tau$ .within | $\tau^2$ .within |
|-----------------|------|----|---------|----------------|------------------|
| Between designs | 0.00 | 0  | --      | 0.0712         | 0.0051           |

Consistency: local approach

Separate indirect from direct evidence (SIDE) using back-calculation method

Random effects model:

comparison k nma direct indir. RoR z p-value

Legend:

comparison - Treatment comparison  
k - Number of studies providing direct evidence  
nma - Estimated treatment effect (RR) in network meta-analysis  
direct - Estimated treatment effect (RR) derived from direct evidence  
indir. - Estimated treatment effect (RR) derived from indirect evidence  
RoR - Ratio of Ratios (direct versus indirect)  
z - z-value of test for disagreement (direct versus indirect)  
p-value - p-value of test for disagreement (direct versus indirect)

**Netrank** Higher p-score values indicate higher ranking of treatments

|                      | P-score |
|----------------------|---------|
| S-RTearly            | 0.6908  |
| L-CRT2               | 0.6342  |
| S-RT + consolidation | 0.5198  |
| L-RT                 | 0.4734  |
| L-CRT1               | 0.4180  |
| CHT                  | 0.4144  |
| Induction + L-CRT    | 0.3494  |

## eReferences

1. Higgins JPT, Thomas J, Chandler J. *Cochrane Handbook for Systematic Reviews of Interventions, 2nd Edition*. (Wiley, ed.). Chichester; 2019. <https://training.cochrane.org/handbook/current>. Accessed March 7, 2023.
2. Cook RJ, Sackett DL. The number needed to treat: a clinically useful measure of treatment effect. *BMJ*. 1995;310(6977):452. doi:10.1136/BMJ.310.6977.452
3. Veroniki AA, Bender R, Glasziou P, Straus SE, Tricco AC. The number needed to treat in pairwise and network meta-analysis and its graphical representation. *J Clin Epidemiol*. 2019;111:11-22. doi:10.1016/J.JCLINEPI.2019.03.007
4. Lu G, Ades AE. Combination of direct and indirect evidence in mixed treatment comparisons. *Stat Med*. 2004;23(20):3105-3124. doi:10.1002/sim.1875
5. Shim SR, Kim SJ, Lee J, Rücker G. Network meta-analysis: application and practice using R software. *Epidemiol Health*. 2019;41:e2019013. doi:10.4178/EPIH.E2019013
6. Higgins J, Thomas J, Chandler J, et al. *Cochrane Handbook for Systematic Reviews of Interventions Version 6.3 (Updated February 2022)*.; 2022. [www.training.cochrane.org/handbook](http://www.training.cochrane.org/handbook).
7. Cipriani A, Higgins JPT, Geddes JR, Salanti G. Conceptual and technical challenges in network meta-analysis. *Ann Intern Med*. 2013;159(2):130-137. doi:10.7326/0003-4819-159-2-201307160-00008
8. Ostuzzi G, Schneider-Thoma J, Tedeschi F, Leucht S, Barbui C. Crossroads of methodological choices in research synthesis: insights from two network meta-analyses on preventing relapse in schizophrenia. *BMJ Ment Heal*. 2023;26(1):e300677. doi:10.1136/BMJMENT-2023-300677
9. Ostuzzi G, Bertolini F, Tedeschi F, et al. Oral and long-acting antipsychotics for relapse prevention in schizophrenia-spectrum disorders: a network meta-analysis of 92 randomized trials including 22,645 participants. *World Psychiatry*. 2022;21(2):295-307. doi:10.1002/wps.20972
10. Bucher HC, Guyatt GH, Griffith LE, Walter SD. The results of direct and indirect treatment comparisons in meta-analysis of randomized controlled trials. *J Clin Epidemiol*. 1997;50(6):683-691. doi:10.1016/S0895-4356(97)00049-8
11. Higgins JPT, Jackson D, Barrett JK, Lu G, Ades AE, White IR. Consistency and inconsistency in network meta-analysis: concepts and models for multi-arm studies. *Res Synth Methods*. 2012;3(2):98-110. doi:10.1002/JRSM.1044
12. White IR, Barrett JK, Jackson D, Higgins JPT. Consistency and inconsistency in network meta-analysis: model estimation using multivariate meta-regression. *Res Synth Methods*. 2012;3(2):111-125. doi:10.1002/JRSM.1045
13. Chaimani A, Higgins JPT, Mavridis D, Spyridonos P, Salanti G. Graphical tools for network meta-analysis in STATA. *PLoS One*. 2013;8(10). doi:10.1371/JOURNAL.PONE.0076654
14. White IR. Network meta-analysis. *Stata J*. 2015;15(4):951-985. doi:10.1177/1536867x1501500403
15. Egger M, Smith GD, Schneider M, Minder C. Bias in meta-analysis detected by a simple, graphical test. *BMJ*. 1997;315(7109):629-634. doi:10.1136/BMJ.315.7109.629
16. Salanti G, Giovane C Del, Chaimani A, Caldwell DM, Higgins JPT. Evaluating the quality of evidence from a network meta-analysis. *PLoS One*. 2014;9(7). doi:10.1371/journal.pone.0099682
17. Nikolakopoulou A, Higgins JPT, Papakonstantinou T, et al. Cinema: An approach for assessing confidence in the results of a network meta-analysis. *PLoS Med*. 2020;17(4). doi:10.1371/JOURNAL.PMED.1003082
