# Supplementary material for: Treatment of Locally Advanced Rectal Cancer in the Era of Total Neoadjuvant Therapy: A Systematic Review and Network Meta-Analysis
Source: PubMed Central journal article supplement (PMC11151159; doi:10.1001/jamanetworkopen.2024.14702), 2024-06-04
Supplement: jamanetwopen-e2414702-s002.pdf [file jamanetwopen-e2414702-s002.pdf]

## Data Sharing Statement

Turri. Treatment of Locally Advanced Rectal Cancer in the Era of Total Neoadjuvant Therapy. *JAMA Netw Open*. Published June 04, 2024. doi:10.1001/jamanetworkopen.2024.14702

### Data

**Data available:** Yes

**Data types:** Other (please specify)

**Additional Information:** Data extracted from randomized clinical trials will be made available upon reasonable request to the corresponding author.

**How to access data:** Data extracted from randomized clinical trials will be made available upon reasonable request to the corresponding author.

**When available:** With publication

### Supporting Documents

**Document types:** None

### Additional Information

**Who can access the data:** Data extracted from randomized clinical trials will be made available upon reasonable request to the corresponding author.

**Types of analyses:** Data extracted from randomized clinical trials will be made available upon reasonable request to the corresponding author.

**Mechanisms of data availability:** Data extracted from randomized clinical trials will be made available upon reasonable request to the corresponding author.
